# Supplementary material for: Integrated metabolome and transcriptome analyses provide insight into the effect of red and blue LEDs on the quality of sweet potato leaves
Source: Front Plant Sci. 2023 May 30;14:1181680. doi: 10.3389/fpls.2023.1181680 (PMC10266350; doi:10.3389/fpls.2023.1181680)
Supplement: Supplementary file 2 [file Table_1.xlsx]

## Sheet: Table S1
Supplementary Table 1: Primers used for real time quantitative PCR for validation
S/No	Gene name	Gene ID	Left primer	right primer
1	petE1	Ipomoea_batatas_newGene_26854	GGAAGCCACAGAGAGGTCAC	ACAGACATCCATTGCCACGT
2	psbS1	Tai6.18802	TCGTGTGGCTATGCTTGGTT	TGGCTCCCAGCAGATTGAAG
3	psbS2	Tai6.19673	CGTGTGGATAGATCTGGGCC	ACAAGGCAACAACCTGACCA
4	psbS3	Tai6.25776	ATCTGACTGAGGCTCGGCTA	AAACGAGGCAGGTACAGTGG
5	psbS4	Tai6.28593	CTTCAATCTGCTGGGAGCCA	ACTGGAGTTGCCTCGGATTG
6	psbS5	Tai6.47726	TCAGCCTCGCTTTGCTCTAG	TAGTCGAGCCTCGGTCAGAT
7	Lhcb1	Tai6.24470	AATTCCCCGCCCAACATGAT	GGATCCCGAACACCTCACTG
8	Lhcb2	Tai6.35269	CGGTTCAGGGAATGTGAGCT	AGGTCACAAGGCGGGATTTT
9	Lhcb3	Tai6.48554	GAACCAGGATAGAGAGCGCC	ATCTTGTGCGGACTAAGGCC
10	β-actin	EU250003.1	GTTATGGTTGGGATGGGACA	GTGCCTCGGTAAGAAGGACA

## Sheet: Table S2
Supplementary Table S2: Total number of metabolites detected in red (R) and blue (B) LED light and quality control sample (mixture of both R and B samples) treated leafy vegetable sweet potato (Fushu-18). All analyses were done in triplicates.
Index	Compounds	Class I	Class II	CAS	Level	R1	R2	R3	Average R	B1	B2	B3	Average B	mix01	mix02	mix03	Average mix	cpd_ID	kegg_map
mws0217	L-Glycine	Amino acids and derivatives	Amino acids and derivatives	56-40-6	3	122410	137820	185500	148577	52735	30929	42608	42090.7	134320	105220	119580	119707	C00037	ko00230,ko00260,ko00310,ko00440,ko00460,ko00480,ko00630,ko00730,ko00860,ko00970,ko01100,ko01110,ko01200,ko01230,ko01240,ko02010
pme1974	Pyruvic acid	Organic acids	Organic acids	127-17-3	3	287080	176510	213310	225633	232400	229150	258900	240150	294970	252130	303790	283630	C00022	ko00010,ko00020,ko00030,ko00040,ko00053,ko00250,ko00260,ko00261,ko00270,ko00290,ko00330,ko00350,ko00360,ko00430,ko00440,ko00620,ko00630,ko00650,ko00660,ko00710,ko00730,ko00760,ko00770,ko00900,ko01100,ko01110,ko01200,ko01210,ko01230,ko01240
pmf0512	Oxamic acid	Amino acids and derivatives	Amino acids and derivatives	471-47-6	3	145550	105410	99649	116870	99675	76548	160120	112114	136200	139430	105790	127140	C01444	ko00230,ko01100
MWS2040	Methanesulfonic acid	Organic acids	Organic acids	75-75-2	3	285990	319440	310000	305143	308350	565070	423570	432330	314980	377930	337370	343427	C11145	ko00920,ko01100
Lmqp000873	Succinic anhydride	Organic acids	Organic acids	108-30-5	3	507320	379220	291140	392560	658030	439820	485300	527717	423820	406220	372150	400730	C19524	--
mws4052	1-Aminocyclopropane-1-carboxylic acid	Organic acids	Organic acids	22059-21-8	3	1336900	1049100	972550	1.11952e+06	1420400	1336800	1323800	1.36033e+06	1208200	1218700	1254100	1227000	C01234	ko00270,ko01100,ko01110
pmf0256	3-Methyl-1-pentanol	Others	Saccharides and Alcohols	589-35-5	3	218560	586740	780720	528673	1172400	385050	260100	605850	590800	523000	572020	561940	--	--
pme3033	N,N-Dimethylglycine	Amino acids and derivatives	Amino acids and derivatives	1118-68-9	3	489310	430170	545780	488420	420110	468960	480080	456383	375590	400370	466600	414187	C01026	ko00260,ko01100
pme3017	2-Aminoisobutyric acid	Organic acids	Organic acids	62-57-7	2	8262400	7989000	7745600	7999000	8576500	8651900	9512900	8.91377e+06	8653500	8491400	8193200	8.44603e+06	C03665	--
pme3011	γ-Aminobutyric acid	Organic acids	Organic acids	56-12-2	3	158620	104270	123400	128763	90958	170680	46502	102713	118920	113910	109550	114127	C00334	ko00250,ko00330,ko00410,ko00650,ko00760,ko01100
MWSmce585	Methyl 3-aminopropanoate	Amino acids and derivatives	Amino acids and derivatives	4138-35-6	2	7129100	6648000	7761800	7.17963e+06	7042500	7117200	8275000	7.47823e+06	6754500	7161600	7034600	6.98357e+06	--	--
ML10172161	Hydroxypyruvic acid	Organic acids	Organic acids	1113-60-6	3	1623300	1078900	568190	1090130	972260	1225500	1474500	1.22409e+06	1096900	1085100	1072900	1.08497e+06	C00168	ko00260,ko00630,ko01100,ko01110,ko01200
Lmbn000193	Tartronate semialdehyde	Organic acids	Organic acids	2480-77-5	3	1577100	1093800	582270	1084390	1010400	1090100	1511600	1.20403e+06	1053900	1142700	1115900	1.10417e+06	C01146	ko00053,ko00630,ko01100
mws0576	3-Hydroxybutyric acid	Organic acids	Organic acids	300-85-6	3	6255900	4614600	2704000	4.52483e+06	3534700	4367900	5204200	4.36893e+06	4186800	3854400	4481800	4.17433e+06	C01089	ko00072,ko00650,ko01100
pme1975	Malonic acid	Organic acids	Organic acids	141-82-2	3	5561900	4360800	2610200	4.17763e+06	3451100	4276000	4867200	4198100	3766500	3830400	3770600	3.78917e+06	C00383	ko00061,ko00240,ko00410,ko01100,ko01212
pme0010	L-Serine	Amino acids and derivatives	Amino acids and derivatives	56-45-1	3	4982000	4146400	5320200	4816200	3598400	3516000	2755100	3.28983e+06	4172800	3867500	4264300	4.10153e+06	C00065	ko00260,ko00261,ko00270,ko00460,ko00564,ko00600,ko00630,ko00920,ko00970,ko01100,ko01110,ko01200,ko01230,ko01240,ko02010
HJAP104	Benzaldehyde	Phenolic acids	Phenolic acids	100-52-7	3	223710	266970	150260	213647	569740	227680	254760	350727	281390	268920	245970	265427	C00261	ko01100
MWS1776	m-Cresol	Phenolic acids	Phenolic acids	108-39-4	3	158250	193460	175280	175663	71980	149050	93658	104896	112320	122310	127780	120803	C01467	--
MWS5173	Isocytosine	Nucleotides and derivatives	Nucleotides and derivatives	108-53-2	3	1593900	1586600	1528000	1569500	1372800	1238900	1160800	1257500	1269900	1312900	1454500	1.34577e+06	--	--
mws0255	Cytosine	Nucleotides and derivatives	Nucleotides and derivatives	71-30-7	2	4067200	4459000	4837900	4454700	2855400	5954400	2379600	3729800	4656100	3809300	3464600	3.97667e+06	C00380	ko00240,ko01100
mws0177	2-Furoic acid	Organic acids	Organic acids	88-14-2	3	174760	332040	152080	219627	112110	179520	77689	123106	196050	115470	206860	172793	C01546	ko01100
pme0257	Uracil	Nucleotides and derivatives	Nucleotides and derivatives	66-22-8	3	1309700	1227600	1983500	1.50693e+06	1627600	1740800	1198200	1522200	1440600	1455600	1409200	1.43513e+06	C00106	ko00240,ko00410,ko00770,ko01100
pme1936	Creatinine	Organic acids	Organic acids	60-27-5	3	818000	813350	864070	831807	823060	798140	807970	809723	815720	765630	789850	790400	C00791	ko00330,ko01100
MWS5172	2-Methyl-4-pentenoic Acid	Organic acids	Organic acids	1575-74-2	3	569270	490150	299160	452860	559170	494130	606190	553163	514610	506080	514190	511627	--	--
pme0006	L-Proline	Amino acids and derivatives	Amino acids and derivatives	147-85-3	3	72116000	40996000	48925000	5.40123e+07	65772000	48405000	49111000	5.44293e+07	49820000	50017000	51831000	50556000	C00148	ko00330,ko00332,ko00970,ko01100,ko01110,ko01230,ko02010
mws0376	Fumaric acid	Organic acids	Organic acids	110-17-8	1	4232600	3588100	1848300	3223000	2426800	2911500	3444200	2927500	2956400	2864400	3180200	3.00033e+06	C00122	ko00020,ko00190,ko00220,ko00250,ko00350,ko00360,ko00620,ko00650,ko00760,ko01100,ko01110,ko01200
MWS2085	Ethyl isobutyrate	Organic acids	Organic acids	97-62-1	3	334310	157470	182240	224673	191210	340350	423610	318390	300240	292460	337250	309983	--	--
MWS1752	Ethyl butyrate	Organic acids	Organic acids	105-54-4	3	329510	111590	217330	219477	210320	401020	432540	347960	251130	284570	297760	277820	--	--
pme3193	N-Acetyl-L-glycine	Amino acids and derivatives	Amino acids and derivatives	543-24-8	3	181100	120020	158970	153363	60219	96142	33778	63379.7	108160	106250	138710	117707	--	--
mws2628	N-Methyl-4-aminobutyric acid	Organic acids	Organic acids	1119-48-8	3	207140	76123	94402	125888	141020	193270	84390	139560	145890	113560	115320	124923	C15987	ko00760,ko01100
MWS5209	N-Methyl-α-aminoisobutyric acid	Amino acids and derivatives	Amino acids and derivatives	2566-34-9	1	645450000	669700000	526530000	6.13893e+08	578170000	622110000	658990000	6.19757e+08	630940000	629910000	618810000	6.26553e+08	--	--
mws0256	L-Valine	Amino acids and derivatives	Amino acids and derivatives	72-18-4	2	263570000	134650000	185890000	1.94703e+08	92512000	104910000	98442000	9.86213e+07	141390000	143120000	141580000	142030000	C00183	ko00280,ko00290,ko00311,ko00460,ko00770,ko00966,ko00970,ko01100,ko01110,ko01210,ko01230,ko01240,ko02010
pme0120	5-Aminovaleric acid	Organic acids	Organic acids	660-88-8	3	148430	75537	177350	133772	103020	80527	68054	83867	102730	105940	94158	100943	C00431	ko00310,ko00330,ko01100
mws0192	Succinic acid	Organic acids	Organic acids	110-15-6	1	241750000	185650000	159000000	1.95467e+08	220330000	208950000	227060000	218780000	193310000	195810000	205630000	198250000	C00042	ko00020,ko00190,ko00250,ko00310,ko00350,ko00360,ko00620,ko00630,ko00640,ko00650,ko00760,ko00920,ko01100,ko01110,ko01200
mws0470	Methylmalonic acid	Organic acids	Organic acids	516-05-2	2	236500000	179990000	160960000	1.92483e+08	220350000	208420000	227340000	2.18703e+08	192320000	193340000	203380000	1.96347e+08	C02170	ko00240,ko00280,ko00640,ko01100
pme1730	D-Erythronolactone	Organic acids	Organic acids	15667-21-7	3	127620	143140	247120	172627	291760	278530	169220	246503	186880	169290	176870	177680	--	--
mws0147	β-Hydroxyisovaleric acid	Organic acids	Organic acids	625-08-1	3	13614000	10850000	5713800	1.00593e+07	4317100	4184700	6101300	4867700	7315300	7115800	7512600	7.31457e+06	C20827	ko00280,ko01100
pme3096	Aminomalonic acid	Organic acids	Organic acids	1068-84-4	3	8564900	6464700	5617800	6.88247e+06	7627200	7416500	8228400	7.75737e+06	6968400	7018500	7259500	7.08213e+06	C00872	--
mws0230	L-Threonine	Amino acids and derivatives	Amino acids and derivatives	72-19-5	3	9524500	5728800	9847700	8367000	6353100	5820900	6354300	6176100	7323300	7392000	7102100	7.27247e+06	C00188	ko00260,ko00261,ko00290,ko00860,ko00970,ko01100,ko01110,ko01230,ko02010
mws0671	L-Homoserine	Amino acids and derivatives	Amino acids and derivatives	672-15-1	3	9513500	5390500	9097400	8.00047e+06	6033600	5903700	6100200	6012500	6827200	6914600	7005800	6.91587e+06	C00263	ko00260,ko00270,ko00300,ko00920,ko01100,ko01110,ko01230
pma0134	D-Threose	Others	Saccharides and Alcohols	95-43-2	3	1695400	16704000	15743000	11380800	7797000	7315400	766240	5292880	8020300	8389100	8273000	8.22747e+06	C06463	--
MWS4305	Erythrose	Others	Saccharides and Alcohols	583-50-6	3	1768200	1306500	1668500	1.58107e+06	1543600	1688600	1778300	1.67017e+06	1491300	1307700	1770500	1.52317e+06	C01796	--
pmb0069	Benzamide	Phenolic acids	Phenolic acids	55-21-0	3	1991000	910350	2245400	1.71558e+06	1400600	1575900	1206400	1394300	1468000	1454500	1476800	1.46643e+06	C09815	--
Lmgp002593	3-hydroxybenzaldehyde	Phenolic acids	Phenolic acids	100-83-4	3	4591700	4638100	3864700	4.36483e+06	3356600	4125700	4574300	4.01887e+06	3839800	3938600	3935200	3.90453e+06	C03067	--
pme0241	Benzoic acid	Phenolic acids	Phenolic acids	65-85-0	3	535850	502890	455190	497977	557330	587460	569810	571533	605750	526170	498180	543367	C00180	ko00360,ko01100,ko01110
mws0628	4-Hydroxybenzaldehyde	Phenolic acids	Phenolic acids	123-08-0	3	2804500	2966000	2815100	2.86187e+06	2248700	2847300	1651900	2249300	2470100	2580400	2485600	2.51203e+06	C00633	ko01100
Lmbn001930	2-Hydroxybenzaldehyde (Salicylaldehyde)	Phenolic acids	Phenolic acids	90-02-8	3	619490	868350	858400	782080	496700	695710	659070	617160	678530	723750	722150	708143	C06202	ko01100
mws0133	Nicotinamide	Others	Vitamin	98-92-0	2	39658000	15486000	26333000	27159000	33721000	35904000	25380000	3.16683e+07	28087000	28700000	28146000	28311000	C00153	ko00760,ko01100,ko01240
ML10179289	2-Phenylethanol	Phenolic acids	Phenolic acids	60-12-8	3	4444100	1626400	4477300	3.51593e+06	3296700	3081500	2973900	3.11737e+06	3038400	3076400	3218100	3.11097e+06	C05853	ko00360
Lmbp000668	Isonicotinic acid	Others	Vitamin	55-22-1	2	7959000	9407200	7018100	8128100	6207700	5725400	5477500	5.80353e+06	6420400	6905100	6635500	6.65367e+06	C07446	--
pme0490	Nicotinic acid (Vitamin B3)	Others	Vitamin	59-67-6	2	6749800	8224200	6692400	7.22213e+06	6137800	5214800	5492400	5615000	5976300	6402200	6108600	6.16237e+06	C00253	ko00760,ko00960,ko01100,ko01110,ko01240
pme1216	2-Picolinic acid	Organic acids	Organic acids	98-98-6	3	208270	167900	294100	223423	205600	136700	165000	169100	173540	174230	156910	168227	C10164	ko00380,ko01100
Lmyp003371	3,5-Dihydroxytoluene	Phenolic acids	Phenolic acids	504-15-4	3	119720	208790	192950	173820	85307	131450	104840	107199	135680	143970	134780	138143	C00727	--
mws0236	2-Aminoethanesulfonic acid	Organic acids	Organic acids	107-35-7	3	363090	493630	405760	420827	267110	440140	246020	317757	454670	400480	369670	408273	C00245	ko00430,ko00920,ko01100,ko02010
pmb0302	2-Aminoethylphosphonate	Lipids	Glycerol ester	2041-14-7	3	261240	325630	300610	295827	367850	362480	237820	322717	285570	307900	287840	293770	C03557	ko00440,ko01100,ko02010
mws0572	5-Methylcytosine	Nucleotides and derivatives	Nucleotides and derivatives	554-01-8	1	293810	281800	321930	299180	152240	314170	179000	215137	190460	173080	211830	191790	C02376	ko00240,ko01100
Zmgn000216	2-Hydroxyethylphosphonic acid	Organic acids	Organic acids	22987-21-9	3	143180	101490	93871	112847	121500	188610	124140	144750	114720	133550	110350	119540	C06451	ko00440,ko00998,ko01100,ko01110
NK10264324	1,3,5-Benzenetriol	Phenolic acids	Phenolic acids	108-73-6	2	1647300	1664200	1736400	1.68263e+06	1394000	1532400	1953200	1.62653e+06	1704100	1523700	1854800	1694200	C02183	--
mws0025	Pyrogallol	Phenolic acids	Phenolic acids	87-66-1	3	339110	495170	416950	417077	127780	428700	200480	252320	366690	345830	350320	354280	C01108	--
MWSmce536	Methyl 2-furoate	Organic acids	Organic acids	611-13-2	3	289560	264190	194510	249420	160130	233760	295570	229820	180180	210020	251600	213933	--	--
mws0251	Thymine	Nucleotides and derivatives	Nucleotides and derivatives	65-71-4	3	3570500	726240	2708900	2.33521e+06	2386700	2474000	2139700	2.33347e+06	2131700	2135200	2258800	2.17523e+06	C00178	ko00240,ko01100
MWSmce448	Imidazol-1-yl-acetic acid*	Organic acids	Organic acids	22884-10-2	3	931060	1091600	1512400	1.17835e+06	1044500	1225200	821010	1.03024e+06	1045500	1077800	1129400	1.08423e+06	--	--
MWSmce118	Imidazole-4-Acetic Acid*	Organic acids	Organic acids	645-65-8	3	924220	937590	1610600	1157470	1268600	1141300	586000	998633	972850	1266900	1321600	1.18712e+06	C02835	ko00340,ko01100
MWS2027	Barbituric acid;Malonylurea;2,4,6-Pyrimidinetrione	Nucleotides and derivatives	Nucleotides and derivatives	67-52-7	2	41752000	54880000	37748000	4.47933e+07	49625000	44404000	49806000	47945000	42222000	49999000	45574000	4.59317e+07	C00813	ko00240,ko01100
MWSmce706	Cyclo(Ala-Gly)	Amino acids and derivatives	Amino acids and derivatives	4526-77-6	2	2929000	3972900	3108200	3336700	4024200	3917600	4092500	4.01143e+06	4495100	3988800	3446300	3.97673e+06	--	--
pme0152	5,6-Dihydro-5-methyluracil	Nucleotides and derivatives	Nucleotides and derivatives	696-04-8	2	158910	238800	472020	289910	186770	291130	84927	187609	203170	223690	228250	218370	C00906	--
MWS0811	L-Pipecolic Acid	Organic acids	Organic acids	3105-95-1	1	122130000	50863000	33100000	6.86977e+07	45356000	46226000	39438000	4.36733e+07	41459000	57226000	52656000	50447000	C00408	ko00310,ko00960,ko01100,ko01110
ML10181668	Cycloleucine	Amino acids and derivatives	Amino acids and derivatives	52-52-8	1	412420000	331380000	275430000	3.39743e+08	329360000	352620000	390410000	3.57463e+08	329420000	332460000	345120000	3.35667e+08	C03969	--
Zmgn000217	Methylenesuccinic acid	Organic acids	Organic acids	97-65-4	1	692870	688350	521840	634353	666010	604710	812670	694463	625540	688880	610300	641573	C00490	ko00660,ko01100
mws0425	Citraconic acid	Organic acids	Organic acids	498-23-7	2	4570900	827130	2351900	2583310	3525400	2604500	3344900	3.15827e+06	2472200	2559300	2487600	2.50637e+06	C02226	ko00290,ko00660,ko01100,ko01210
MWS2413	N-acetyl-beta-alanine	Amino acids and derivatives	Amino acids and derivatives	3025-95-4	3	69812	125190	151840	115614	74143	112890	84866	90633	126080	103970	97025	109025	C01073	ko00410
mws0712	N-Propionylglycine	Amino acids and derivatives	Amino acids and derivatives	21709-90-0	3	225520	288380	245840	253247	255660	245650	325550	275620	293680	321390	210610	275227	--	--
mws0216	Trans-4-Hydroxy-L-proline	Amino acids and derivatives	Amino acids and derivatives	51-35-4	2	118340000	59451000	89958000	8.92497e+07	32810000	49290000	39845000	4.06483e+07	78100000	56628000	74772000	6.98333e+07	C01157	ko00330,ko01100,ko02010
ML10197929	Creatine	Organic acids	Organic acids	57-00-1	2	1893600	2054300	2507600	2.15183e+06	1271200	2180600	1343100	1598300	1859700	1938900	1848200	1.88227e+06	C00300	ko00260,ko00330,ko01100
mws1587	L-Norleucine*	Amino acids and derivatives	Amino acids and derivatives	327-57-1	1	717810000	566710000	638710000	6.41077e+08	493940000	534460000	501900000	510100000	603700000	608300000	583490000	5.98497e+08	C01933	--
mws0227	L-Leucine*	Amino acids and derivatives	Amino acids and derivatives	61-90-5	1	745060000	582300000	655890000	6.61083e+08	509530000	554400000	518130000	5.27353e+08	630940000	633730000	604120000	622930000	C00123	ko00280,ko00290,ko00966,ko00970,ko01100,ko01110,ko01210,ko01230,ko02010
mws0258	L-Isoleucine*	Amino acids and derivatives	Amino acids and derivatives	73-32-5	1	729530000	574250000	645080000	649620000	499010000	539310000	506920000	515080000	621880000	620270000	588260000	6.10137e+08	C00407	ko00280,ko00290,ko00460,ko00960,ko00966,ko00970,ko01100,ko01110,ko01210,ko01230,ko02010
pme2679	L-Allo-isoleucine	Amino acids and derivatives	Amino acids and derivatives	1509-34-8	3	150120000	69919000	103150000	1.0773e+08	38940000	55982000	46828000	47250000	87749000	67128000	86437000	80438000	C21096	--
pme0274	6-Aminocaproic acid	Organic acids	Organic acids	60-32-2	2	26123000	11998000	17098000	1.84063e+07	6275600	9320000	7991800	7.86247e+06	15598000	11619000	14362000	1.38597e+07	C02378	ko01100
mws1167	Oxaloacetic acid	Organic acids	Organic acids	328-42-7	3	259220	154730	79513	164488	224330	253450	301190	259657	194420	203820	213390	203877	C00036	ko00010,ko00020,ko00250,ko00620,ko00630,ko00710,ko01100,ko01110,ko01200,ko01210,ko01230,ko01240
Lmmn000806	Dimethylmalonic acid	Organic acids	Organic acids	595-46-0	1	3659600	5178800	2157500	3665300	2542900	2315500	4539400	3132600	3205300	3349700	3279000	3278000	--	--
pme0243	Glutaric acid	Organic acids	Organic acids	110-94-1	3	3566500	2660200	2200700	2.80913e+06	2703300	2444300	2734900	2627500	2478300	2663200	2582700	2.57473e+06	C00489	ko00071,ko00310,ko01100
Lmbn001288	2-Hydroxy-2-methyl-3-oxobutanoic acid	Organic acids	Organic acids	71698-08-3	1	3743200	5248100	2191300	3.72753e+06	2533500	2260700	4657800	3.15067e+06	3255000	3430900	3446200	3.37737e+06	C06010	ko00290,ko00650,ko00660,ko00770,ko01100,ko01110,ko01210,ko01230
mws0473	2-Methylsuccinic acid	Organic acids	Organic acids	498-21-5	1	33982000	47520000	19068000	3.35233e+07	22948000	21763000	41100000	2.86037e+07	30171000	30262000	31446000	3.06263e+07	--	--
Lmmn002164	Monomethyl succinate	Organic acids	Organic acids	3878-55-5	1	3543700	4912800	2141400	3.53263e+06	2431000	2333600	4417800	3060800	3030800	3248300	3286400	3188500	--	--
Lmgn000160	3-Ureidopropionic Acid	Organic acids	Organic acids	462-88-4	1	1951200	3800700	5342800	3.69823e+06	552550	1167300	814000	844617	2304000	2384100	2355700	2.34793e+06	C02642	ko00240,ko00410,ko00770,ko01100
mws0001	L-Asparagine	Amino acids and derivatives	Amino acids and derivatives	70-47-3	1	33127000	63735000	98294000	65052000	11179000	18894000	16314000	1.54623e+07	45445000	43197000	44070000	4.42373e+07	C00152	ko00250,ko00460,ko00970,ko01100,ko01110,ko01230
mws1503	Cinnamaldehyde	Phenolic acids	Phenolic acids	14371-10-9	2	323840	372130	291290	329087	106680	288700	137750	177710	269440	271480	266840	269253	C00903	ko00940,ko01100,ko01110
Lmrn002746	2-Hydroxy-4-methylpentanoic acid	Organic acids	Organic acids	498-36-2	3	275820	264060	257780	265887	120320	185990	173860	160057	214330	217390	211740	214487	--	--
mws0972	6-Hydroxyhexanoic acid	Organic acids	Organic acids	1191-25-9	3	540680	413970	314470	423040	16164000	262310	155300	5.5272e+06	4216200	4198400	4433100	4.28257e+06	C06103	--
mws0341	2-Hydroxyisocaproic acid	Organic acids	Organic acids	20312-37-2	3	315630	252520	229900	266017	235470	169650	118840	174653	218970	262570	245800	242447	C03264	--
MWS1882	Iminodiacetic acid	Organic acids	Organic acids	142-73-4	2	1191600	924050	1076300	1.06398e+06	1796700	1452000	1289200	1.51263e+06	1242700	1302100	1269700	1271500	C19911	--
mws0219	L-Aspartic Acid	Amino acids and derivatives	Amino acids and derivatives	56-84-8	1	9723000	8114200	8938200	8.92513e+06	13923000	11765000	10067000	1.19183e+07	10026000	9931700	10094000	1.00172e+07	C00049	ko00220,ko00250,ko00260,ko00261,ko00270,ko00300,ko00340,ko00410,ko00460,ko00710,ko00760,ko00770,ko00970,ko01100,ko01110,ko01200,ko01210,ko01230,ko01240,ko02010
MWS1709	D-Malic acid	Organic acids	Organic acids	636-61-3	1	78866000	63730000	42800000	6.17987e+07	45881000	61489000	72714000	60028000	55387000	56886000	56533000	5.62687e+07	C00497	ko00650,ko01100
mws0275	L-Malic acid	Organic acids	Organic acids	97-67-6	1	258210000	216480000	146300000	2.06997e+08	155420000	206240000	240200000	200620000	186200000	190640000	187100000	187980000	C00149	ko00020,ko00620,ko00630,ko00710,ko01100,ko01110,ko01200
Lmbn000198	3-Dehydro-L-Threonic Acid	Others	Saccharides and Alcohols	-	1	78528000	64857000	42856000	6.20803e+07	46960000	62295000	74357000	61204000	56082000	57189000	56728000	5.66663e+07	C03064	ko00053,ko01100
Zmgn000503	2,3-Dihydroxy-3-Methylbutanoic Acid	Organic acids	Organic acids	1756-18-9	2	15959000	17022000	14315000	1.57653e+07	10943000	11971000	14262000	12392000	12890000	13478000	13693000	1.33537e+07	C04039	--
Zmdp000972	S-Methyl-L-cysteine	Amino acids and derivatives	Amino acids and derivatives	1187-84-4	2	191520000	248290000	163990000	2.01267e+08	82568000	143640000	85315000	103841000	165940000	168390000	162760000	1.65697e+08	C22040	ko02010
pme0057	L-Homocysteine	Amino acids and derivatives	Amino acids and derivatives	6027-13-0	3	3361600	5340800	2657600	3.78667e+06	1058300	2247700	904130	1.40338e+06	2615300	2609300	2698300	2.64097e+06	C00155	ko00270,ko00920,ko01100,ko01110,ko01230
pme0040	Adenine	Nucleotides and derivatives	Nucleotides and derivatives	73-24-5	2	143170000	121720000	126820000	130570000	116540000	140780000	79378000	1.12233e+08	118880000	121050000	117950000	1.19293e+08	C00147	ko00230,ko00908,ko01100
pmb0374	2-Aminopurine	Nucleotides and derivatives	Nucleotides and derivatives	452-06-2	1	37451000	25435000	28911000	30599000	35400000	35395000	30922000	3.39057e+07	31371000	30296000	32366000	3.13443e+07	--	--
mws0889	D-Threonic Acid	Others	Saccharides and Alcohols	3909-12-4	1	1780500	1166200	1004100	1.31693e+06	1434800	1489300	1446200	1.45677e+06	1271200	1303700	1425700	1.33353e+06	C21649	--
pme0033	Hypoxanthine	Nucleotides and derivatives	Nucleotides and derivatives	68-94-0	3	2462000	2993900	1713500	2389800	1016500	1672400	842950	1.17728e+06	1633900	1746800	1792400	1.72437e+06	C00262	ko00230,ko01100
Smzp002588	4-Hydroxyacetophenone	Phenolic acids	Phenolic acids	99-93-4	3	720840	369120	334800	474920	209360	346590	382640	312863	390670	411690	381310	394557	C10700	ko01100
MWS2099	4-Methylbenzoic acid	Phenolic acids	Phenolic acids	99-94-5	2	855960	419040	432050	569017	354410	338050	439360	377273	411930	470900	507330	463387	C01454	ko01100
MWS1852	4-Methoxybenzaldehyde	Phenolic acids	Phenolic acids	123-11-5	3	449260	421940	188530	353243	592760	482150	553240	542717	314120	377920	407130	366390	C10761	--
pme1724	Benzoic acid methyl ester	Phenolic acids	Phenolic acids	93-58-3	2	590080	461690	540670	530813	518370	525140	573520	539010	543620	511830	530760	528737	C20645	--
mws1078	Anthranilic Acid	Phenolic acids	Phenolic acids	118-92-3	3	246670	175270	190830	204257	223190	244360	169410	212320	212380	227800	204180	214787	C00108	ko00380,ko00400,ko00998,ko01058,ko01100,ko01110,ko01230
mws1336	4-Aminobenzoic acid	Phenolic acids	Phenolic acids	150-13-0	3	283830	421630	360130	355197	89413	210100	118240	139251	231460	231680	243980	235707	C00568	ko00790,ko01100,ko01240
Hmgn001653	Protocatechualdehyde	Phenolic acids	Phenolic acids	139-85-5	1	2940900	2908300	1546900	2.46537e+06	1306200	2148900	777210	1410770	1989300	2160300	2228200	2.12593e+06	C16700	ko00950
Lmgn001670	Salicylic acid	Phenolic acids	Phenolic acids	69-72-7	1	7215100	5741600	6969500	6.64207e+06	6725700	6640200	7078800	6814900	6514900	6911000	6938000	6.78797e+06	C00805	ko00360,ko01100,ko01110,ko04075
Lmbn001981	2,5-Dihydroxybenzaldehyde	Phenolic acids	Phenolic acids	1194-98-5	1	2435500	2994700	1443800	2.29133e+06	1201300	2550000	814240	1.52185e+06	1872100	1909300	2026700	1.93603e+06	C05585	ko00350,ko01100
mws0749	4-Hydroxybenzoic acid	Phenolic acids	Phenolic acids	99-96-7	1	4709300	2727200	4246700	3894400	4888300	4603500	4111300	4.53437e+06	3811200	4185700	4217000	4071300	C00156	ko00130,ko00790,ko01100,ko01110,ko01240
mws2368	Tyrosol; 4-Hydroxyphenylethanol	Phenolic acids	Phenolic acids	501-94-0	2	911740	702250	834670	816220	828690	763310	782500	791500	789870	800550	867200	819207	C06044	ko00350,ko01100
pme2828	4-Nitrophenol	Phenolic acids	Phenolic acids	100-02-7	3	37641000	40121000	39309000	3.90237e+07	35868000	31282000	38650000	3.52667e+07	34909000	31135000	33847000	33297000	C00870	--
pme3207	Muconic acid	Organic acids	Organic acids	1119-72-8	3	6833700	7468500	16633000	1.03117e+07	25244000	14159000	8384600	15929200	12294000	13479000	13634000	1.31357e+07	C02480	ko01100
Lmgn003544	cis-3-Hexenyl acetate	Lipids	Free fatty acids	3681-71-8	3	7331100	5659800	5576300	6.18907e+06	5646200	5783600	6579200	6003000	8587800	8889400	8679300	8.71883e+06	C19757	ko00592,ko01110
MWSmce449	Cyclohexaneacetic acid	Organic acids	Organic acids	5292-21-7	3	7201600	5729300	5440700	6.12387e+06	6279000	5837800	6989900	6368900	8930100	9116200	9264800	9103700	--	--
Rfmb320	1-Methylpiperidine-2-carboxylic acid	Organic acids	Organic acids	7730-87-2	3	20001000	18230000	20702000	1.96443e+07	21812000	18323000	20002000	2.00457e+07	17959000	17944000	18870000	1.82577e+07	--	--
Hmsp000364	L-Cyclopentylglycine	Amino acids and derivatives	Amino acids and derivatives	2521-84-8	2	7242000	6827700	5769000	6612900	6057000	6964900	5788000	6.26997e+06	5629300	5916200	5909200	5.81823e+06	--	--
MWS4414	trans-2-Butene-1,4-dicarboxylic Acid	Organic acids	Organic acids	4436-74-2	3	353130	423200	239960	338763	120590	351170	270300	247353	275080	309750	266030	283620	--	--
Rfmb318	D-Proline betaine	Amino acids and derivatives	Amino acids and derivatives	1195-94-4	3	9859400	8624000	9749500	9.41097e+06	10845000	8829800	9973800	9.88287e+06	8878700	8737200	7865600	8.49383e+06	C21514	--
mws0851	Valproic Acid	Organic acids	Organic acids	99-66-1	3	2949400	3262900	3099200	3.10383e+06	2842800	3101400	2635000	2.85973e+06	3679500	3858500	3791800	3776600	C07185	--
pme3351	Allysine(6-Oxo DL-Norleucine)	Amino acids and derivatives	Amino acids and derivatives	1962-83-0	3	662590	413810	257920	444773	660000	675150	961330	765493	647490	577840	623140	616157	C04076	ko00300,ko00310,ko00960,ko01100,ko01110,ko01230
Lmqp000427	N-Methyl-Trans-4-Hydroxy-L-Proline	Amino acids and derivatives	Amino acids and derivatives	4252-82-8	1	364830000	382950000	403820000	3.83867e+08	290090000	341020000	328080000	319730000	356970000	347190000	356200000	3.53453e+08	--	--
pme0295	4-Acetamidobutyric acid	Organic acids	Organic acids	3025-96-5	3	817120	900850	540920	752963	892580	756650	721160	790130	750790	904000	748310	801033	C02946	ko00330,ko01100
mws0567	4-Guanidinobutyric acid	Organic acids	Organic acids	463-00-3	2	3886000	4005700	3571400	3.82103e+06	2129600	2169800	2132900	2144100	2420300	2375100	3069000	2.62147e+06	C01035	ko00330,ko01100
Lmgn000224	2-Methyl-3-oxosuccinic acid	Organic acids	Organic acids	-	1	1249500	868430	1218200	1.11204e+06	1215800	1016800	1671500	1.30137e+06	1046800	1148600	1016900	1.07077e+06	C06030	ko00660
pme2380	α-Ketoglutaric acid	Organic acids	Organic acids	328-50-7	3	7146700	5436000	8045400	6.87603e+06	6935200	5498600	8358700	6.93083e+06	6580000	6937000	6576500	6.69783e+06	C00026	ko00020,ko00040,ko00053,ko00220,ko00250,ko00300,ko00310,ko00340,ko00430,ko00630,ko00650,ko00660,ko01100,ko01110,ko01200,ko01210,ko01230,ko01240
mws0924	2-Methylglutaric acid	Organic acids	Organic acids	617-62-9	3	4614000	6530000	2389300	4511100	3051200	3609700	3363400	3.34143e+06	3793900	3825400	3924000	3.84777e+06	--	--
MWS5136	Mono-Methyl Glutarate	Organic acids	Organic acids	1501-27-5	3	143240	145300	71747	120096	88150	81839	175160	115050	102340	111190	105890	106473	--	--
mws0208	Adipic Acid	Organic acids	Organic acids	124-04-9	3	4892000	6711400	2441500	4.68163e+06	3008200	3641000	3413300	3.35417e+06	3814000	4093300	3799200	3.90217e+06	C06104	ko01100
Lmbn001609	2-Acetyl-2-Hydroxybutanoic Acid	Organic acids	Organic acids	-	3	183520	289960	101030	191503	150600	168860	163340	160933	175020	164700	148300	162673	C06006	ko00290,ko01100,ko01110,ko01210,ko01230
Lmbn001676	3-Hydroxy-3-Methyl-2-Oxopentanoic Acid	Organic acids	Organic acids	-	3	159380	139960	65047	121462	72416	78666	156960	102681	95808	91080	125330	104073	C14463	ko00290,ko01110,ko01210
Wmzn000227	2,2-Dimethylsuccinic acid	Organic acids	Organic acids	597-43-3	3	266300	121880	174070	187417	66788	79735	66581	71034.7	119320	115740	119250	118103	--	--
pme0193	L-Glutamine	Amino acids and derivatives	Amino acids and derivatives	56-85-9	3	8110800	7051800	10527000	8563200	5028300	8603200	5781900	6.47113e+06	7499900	7667100	7415800	7527600	C00064	ko00220,ko00230,ko00240,ko00250,ko00630,ko00750,ko00910,ko00970,ko01100,ko01230,ko01240,ko02010
pme0026	L-Lysine	Amino acids and derivatives	Amino acids and derivatives	56-87-1	3	8071900	6775500	10556000	8467800	4763500	8202700	5765300	6.24383e+06	7535400	7278600	7899900	7571300	C00047	ko00300,ko00310,ko00780,ko00960,ko00970,ko01100,ko01110,ko01210,ko01230,ko02010
mws1050	O-Acetylserine	Amino acids and derivatives	Amino acids and derivatives	5147-00-2	3	2426000	2079900	2368400	2.29143e+06	1804500	1977900	1131200	1.63787e+06	1824300	2076600	2026200	1975700	C00979	ko00270,ko00908,ko00920,ko01100,ko01110,ko01200,ko01230,ko04122
Zmzn000113	L-threo-3-Methylaspartate	Amino acids and derivatives	Amino acids and derivatives	6061-13-8	1	4700500	3379700	3472400	3.85087e+06	4110200	5275300	3683300	4.35627e+06	3823400	3988800	4020500	3.94423e+06	C03618	ko00630,ko00660,ko01100,ko01200
pme0014	L-Glutamic acid	Amino acids and derivatives	Amino acids and derivatives	56-86-0	1	211850000	149110000	174450000	178470000	264560000	221970000	195720000	2.27417e+08	204540000	189340000	192560000	195480000	C00025	ko00220,ko00250,ko00330,ko00332,ko00340,ko00430,ko00480,ko00524,ko00630,ko00650,ko00660,ko00860,ko00910,ko00970,ko01100,ko01110,ko01200,ko01210,ko01230,ko01240,ko02010
MWSmce608	4-Hydoxy-L-Isoleucine	Amino acids and derivatives	Amino acids and derivatives	781658-23-9	3	1108500	808120	779420	898680	942050	905280	895810	914380	890430	939270	964090	931263	--	--
pmp001285	Phthalic anhydride	Phenolic acids	Phenolic acids	85-44-9	1	20133000	23828000	19917000	2.12927e+07	17717000	21589000	22804000	2.07033e+07	16582000	25601000	17304000	19829000	--	--
pmb2826	L-Citramalic acid	Organic acids	Organic acids	6236-09-5	1	3548500	3756600	2685300	3.33013e+06	3841900	3560300	4681400	4.02787e+06	3381100	3374700	3731300	3495700	C02614	ko00660,ko01100
ML10171848	D-Arabinono-1,4-lactone	Others	Saccharides and Alcohols	2782-09-4	2	4130900	2857100	2245000	3.07767e+06	2688500	2505400	2777700	2657200	2960300	2988200	2560500	2.83633e+06	C00652	ko00053
Lmbn000216	3-Methylmalic acid	Organic acids	Organic acids	152204-30-3	1	2479000	2416800	1792500	2.22943e+06	2802500	2458500	3088900	2783300	2233800	2410500	2390400	2344900	C06032	ko00290,ko00660,ko01100,ko01210,ko01230
Zmyn000230	2-Dehydro-3-deoxy-L-arabinonate	Others	Saccharides and Alcohols	-	1	2504600	2801400	2099700	2.46857e+06	2357700	2456000	2900500	2571400	2277400	2424000	2232900	2.31143e+06	C00684	ko00053,ko01100
MWS3036	3-Hydroxyglutaric acid	Organic acids	Organic acids	638-18-6	2	4406300	3504200	2313300	3.40793e+06	2731500	2832200	2600400	2.72137e+06	2823000	3161900	2921600	2.96883e+06	--	--
Zmyn000247	2-Hydroxyglutaric Acid	Organic acids	Organic acids	13095-48-2	1	2491600	2560200	1949300	2333700	2706600	2461100	3066100	2744600	2207000	2406900	2378800	2330900	C03196	ko00310,ko01100
MWS20194	Cinnamic acid	Phenolic acids	Phenolic acids	140-10-3	3	811620	354930	440860	535803	610360	654930	634720	633337	602170	569460	575300	582310	C00423	ko00130,ko00360,ko00940,ko00998,ko01100,ko01110
Lmbn001034	2,3-Dihydroxy-3-methylpentanoic acid	Organic acids	Organic acids	562-43-6	1	224350	150790	130160	168433	64988	105200	101040	90409.3	152050	130680	126860	136530	C06007	ko00290,ko01100,ko01110,ko01210,ko01230
pme3154	Mevalonic acid	Organic acids	Organic acids	150-97-0	2	1702100	1198200	935270	1.27852e+06	1079300	1073700	1408300	1187100	988340	1412900	1136600	1179280	C00418	ko00900,ko01100,ko01110
mws0224	DL-Methionine	Amino acids and derivatives	Amino acids and derivatives	59-51-8	3	15332000	6978100	12211000	1.1507e+07	10851000	6861900	8461500	8724800	9270300	9237500	9838800	9.44887e+06	--	--
pme1210	L-Methionine	Amino acids and derivatives	Amino acids and derivatives	63-68-3	1	12671000	5751500	10347000	9.58983e+06	10824000	5994800	8817400	8545400	7676800	8373400	8337900	8.12937e+06	C00073	ko00270,ko00966,ko00970,ko01100,ko01110,ko01210,ko01230,ko01240
mws0847	1-Methyladenine	Nucleotides and derivatives	Nucleotides and derivatives	5142-22-3	1	1168800	502160	1048400	906453	1262300	905690	980030	1049340	919090	915690	1004600	946460	C02216	--
mws0262	L-Tartaric acid	Organic acids	Organic acids	87-69-4	2	503860	434950	426990	455267	268300	364900	350820	328007	309280	387730	443990	380333	C00898	ko00630,ko01100
Zmgn000173	D-Ribose	Others	Saccharides and Alcohols	50-69-1	1	762200	588730	397460	582797	585230	550720	777870	637940	484050	491550	488830	488143	C00121	ko00030,ko01100,ko02010
MWSmce199	L-Xylose	Others	Saccharides and Alcohols	609-06-3	2	714710	546130	477920	579587	517840	728720	848740	698433	584190	611230	602130	599183	C01510	--
MWSmce676	D-Arabinose	Others	Saccharides and Alcohols	10323-20-3	2	698580	564730	567190	610167	705780	805850	998380	836670	661240	640150	685920	662437	C00216	ko00040,ko00053
mws0921	p-Coumaryl alcohol	Phenolic acids	Phenolic acids	3690-05-9	3	833810	2189900	1028200	1.35064e+06	175830	621420	135990	311080	816640	816310	837930	823627	C02646	ko00940,ko01100,ko01110
pmf0420	Benzyl acetate	Organic acids	Organic acids	140-11-4	3	567380	617460	685970	623603	1222400	961500	620260	934720	589800	555970	589160	578310	C15513	--
pme0183	Isoguanine	Nucleotides and derivatives	Nucleotides and derivatives	3373-53-3	3	8583500	9326500	6364300	8.09143e+06	5805000	7600100	4113500	5.83953e+06	7153600	6680000	6602800	6.81213e+06	--	--
pme1109	Guanine	Nucleotides and derivatives	Nucleotides and derivatives	73-40-5	1	48035000	58629000	34483000	47049000	22846000	36629000	18102000	25859000	33758000	33953000	34549000	3.40867e+07	C00242	ko00230,ko01100
pme0256	Xanthine	Nucleotides and derivatives	Nucleotides and derivatives	69-89-6	1	230500	955030	534310	573280	100850	182290	151920	145020	306030	457490	259050	340857	C00385	ko00230,ko00232,ko01100,ko01110
MWS2984	8-Azaguanine	Nucleotides and derivatives	Nucleotides and derivatives	134-58-7	3	4566900	5336400	3374000	4.42577e+06	2119200	3381600	1803100	2.43463e+06	2983200	3427300	3064000	3.15817e+06	--	--
MWSmce040	Isovanillin	Phenolic acids	Phenolic acids	621-59-0	2	2990600	6974800	4522100	4.82917e+06	465990	5080900	839250	2.12871e+06	3230200	3268700	3045600	3181500	--	--
MWS1846	Phenoxyacetic acid	Phenolic acids	Phenolic acids	122-59-8	2	4602200	13418000	6686300	8235500	290230	10185000	851260	3.7755e+06	4382400	4447300	4719300	4.51633e+06	C02181	--
pma0675	o-Anisic acid	Phenolic acids	Phenolic acids	579-75-9	3	108290	139170	143010	130157	40404	112450	73192	75348.7	93420	128280	91421	104374	--	--
MWS1734	Anisic acid; 4-Methoxybenzoic acid	Phenolic acids	Phenolic acids	100-09-4	3	96818	120800	81935	99851	100330	58917	265110	141452	115850	112090	124950	117630	C02519	--
mws0145	O-Anisic acid (2-Methoxybenzoic acid)	Phenolic acids	Phenolic acids	529-75-9	2	2073800	5807000	3115100	3665300	98832	5006500	355030	1.82012e+06	1752100	2101500	1894000	1.91587e+06	--	--
MWS3149	3-Methoxybenzoic acid	Phenolic acids	Phenolic acids	586-38-9	3	262350	373320	117040	250903	118280	120550	177230	138687	185220	205020	197950	196063	--	--
mws0458	Vanillin; 4-Hydroxy-3-Methoxybenzaldehyde	Phenolic acids	Phenolic acids	121-33-5	2	742860	1931700	1212800	1.29579e+06	74104	1262900	125320	487441	655670	611270	653260	640067	C00755	ko00998,ko01100,ko01110
mws0438	L-Arabitol	Others	Saccharides and Alcohols	7643-75-6	3	334830	276710	147900	253147	285270	392440	387990	355233	250930	302330	264030	272430	C00532	ko00040,ko01100
mws0213	Ribitol	Others	Saccharides and Alcohols	488-81-3	3	428230	434200	175980	346137	366880	461270	539150	455767	288910	374990	313520	325807	C00474	ko00040,ko00740,ko01100
mws0437	D-Arabitol	Others	Saccharides and Alcohols	488-82-4	3	516240	397290	174480	362670	500400	525250	666100	563917	477660	493200	406230	459030	C01904	ko00040,ko01100
pme0513	Xylitol	Others	Saccharides and Alcohols	87-99-0	3	374300	388780	160060	307713	328600	370980	432500	377360	260050	261250	299320	273540	C00379	ko00040,ko01100,ko02010
MWS1962	cis-Citral	Organic acids	Organic acids	5392-40-5	3	1132800	1676300	1204200	1.33777e+06	1192300	1090300	1179600	1.15407e+06	1175900	1222700	1216100	1204900	C09847	ko01110
ML10177402	4-Aminosalicylic acid	Phenolic acids	Phenolic acids	65-49-6	3	222470	323680	335880	294010	93350	378250	106980	192860	256830	260860	266410	261367	C02518	--
MWSslk102	6-Chloropurine	Nucleotides and derivatives	Nucleotides and derivatives	87-42-3	3	2684800	2462000	2637800	2.59487e+06	2958400	2840200	2686100	2.82823e+06	2714800	2558400	2587200	2.62013e+06	--	--
mws0885	2,4-Dihydroxybenzoic acid	Phenolic acids	Phenolic acids	89-86-1	3	705900	477060	321600	501520	688900	678630	795890	721140	626640	511810	620910	586453	--	--
mws0183	3,4-Dihydroxybenzoic acid (Protocatechuic acid)*	Phenolic acids	Phenolic acids	99-50-3	3	1564800	938340	851730	1118290	1147600	1137000	1101900	1.12883e+06	1008300	923400	978200	969967	C00230	ko01100,ko01110
mws0180	2,5-Dihydroxybenzoic acid; Gentisic Acid*	Phenolic acids	Phenolic acids	490-79-9	3	820500	337690	413190	523793	495590	475420	475690	482233	466360	517330	448060	477250	C00628	ko00350,ko01100
mws0639	2,3-Dihydroxybenzoic Acid*	Phenolic acids	Phenolic acids	303-38-8	3	2133000	1054100	974770	1387290	1411600	1272800	1075000	1.25313e+06	1154400	1057800	1314700	1.17563e+06	C00196	ko01110
Jmwp002208	3,4-dihydroxy phenylethanol	Phenolic acids	Phenolic acids	-	3	172640	150290	133450	152127	193750	174440	225890	198027	154390	155650	137450	149163	--	--
MWSmce264	Hydroxytyrosol	Phenolic acids	Phenolic acids	10597-60-1	3	166190	270350	249840	228793	369340	147890	63158	193463	253060	180200	234350	222537	--	--
MWSmce284	3,4-Dimethoxyphenol	Phenolic acids	Phenolic acids	2033-89-8	3	112040	262330	260550	211640	247920	188800	168800	201840	179230	211830	173270	188110	--	--
MWSmce663	Vanillyl alcohol	Phenolic acids	Phenolic acids	498-00-0	3	131570	128230	116280	125360	120570	132400	111830	121600	123690	115310	117460	118820	--	--
mws0254	L-Histidine	Amino acids and derivatives	Amino acids and derivatives	71-00-1	1	74289000	49911000	60751000	6.16503e+07	23429000	23428000	29762000	2.55397e+07	45360000	44664000	45001000	4.50083e+07	C00135	ko00340,ko00410,ko00970,ko01100,ko01110,ko01230,ko02010
mws2124	2-Phosphoglycolate	Organic acids	Organic acids	13147-57-4	3	1079300	1015600	837760	977553	1000700	1240700	1242800	1161400	1012600	1034400	987010	1.01134e+06	--	--
pme2165	Orotic acid (Vitamin B13)	Others	Vitamin	65-86-1	3	1643400	1450500	1509700	1.53453e+06	1262900	1583900	1580600	1475800	1667500	1432000	1507500	1.53567e+06	C00295	ko00240,ko01100,ko01240
MWS1837	TranexamicAcid	Organic acids	Organic acids	1197-18-8	3	179940	275620	153780	203113	129200	182840	169760	160600	173000	151750	188020	170923	--	--
MWS0205	Allantoin	Organic acids	Organic acids	97-59-6	2	122260	567220	900470	529983	37364	93739	156620	95907.7	380410	383940	395980	386777	C01551	--
Zmyn004238	Nonanoic Acid	Organic acids	Organic acids	112-05-0	3	267440	331180	352160	316927	286140	284660	283210	284670	359090	375580	422870	385847	C01601	--
pmf0175	2-Decanol*	Others	Saccharides and Alcohols	1120-06-5	3	3704100	7981400	6010700	5.89873e+06	2017900	2987500	1185700	2063700	3885100	3694800	3768000	3.78263e+06	--	--
pmf0174	1-Decanol*	Others	Saccharides and Alcohols	112-30-1	3	3700500	7897600	6182100	5.92673e+06	1948100	2932700	1190900	2023900	3779700	3705200	3883600	3789500	C01633	--
Lmbn001467	5-Acetamidopentanoic Acid	Organic acids	Organic acids	1072-10-2	2	2523900	2862600	3581100	2989200	1397000	2103900	1008400	1503100	2167300	2133600	2180200	2.16037e+06	C03087	ko00310,ko01100
Zmdp000917	δ-Guanidinovaleric acid	Organic acids	Organic acids	462-93-1	3	260110	198040	222050	226733	229020	300270	435330	321540	320180	297210	303820	307070	--	--
pme2589	2-Oxoadipic acid	Organic acids	Organic acids	3184-35-8	3	430980	430030	630980	497330	383190	424320	546980	451497	398820	494830	472970	455540	C00322	ko00300,ko00310,ko00380,ko01100,ko01110,ko01210,ko01230,ko01240
Lmbn002072	2-Propylsuccinic acid	Organic acids	Organic acids	618-57-5	2	164180	535820	1080400	593467	462110	432920	150050	348360	527570	442060	512470	494033	C16657	--
Zmjn001813	Pimelic acid	Organic acids	Organic acids	111-16-0	2	147370	518240	1124600	596737	528500	471910	192140	397517	490510	452420	512330	485087	C02656	ko00780,ko01100,ko01240
pme3382	N-Acetyl-L-threonine	Amino acids and derivatives	Amino acids and derivatives	17093-74-2	3	215190	408040	348530	323920	197960	300300	289960	262740	256710	336250	203960	265640	--	--
MWS0559	1,6-anhydro-β-D-glucose	Others	Saccharides and Alcohols	498-07-7	2	167330	153750	142230	154437	193700	191250	201190	195380	164790	139600	178720	161037	--	--
pme2914	3-Hydroxy-3-methylpentane-1,5-dioic acid	Amino acids and derivatives	Amino acids and derivatives	503-49-1	2	91378000	63464000	47345000	6.73957e+07	34407000	59728000	40341000	4.48253e+07	51933000	53634000	53357000	5.29747e+07	C03761	--
Lmqp008175	Methyl Cinnamate	Phenolic acids	Phenolic acids	103-26-4	3	543160	707880	583710	611583	385120	334190	572380	430563	494710	519290	491030	501677	C06358	--
pmf0440	4-MethoxycinnaMaldehyde	Phenolic acids	Phenolic acids	1963-36-6	3	197730	211270	194850	201283	178670	239590	134920	184393	130880	87316	143300	120499	C10475	--
pme2758	4-Hydroxy-L-glutamic acid	Amino acids and derivatives	Amino acids and derivatives	3913-68-6	3	165050	123690	46409	111716	113260	186240	209370	169623	142620	146030	170920	153190	C03079	--
pme1419	L-Methionine methyl ester	Amino acids and derivatives	Amino acids and derivatives	10332-17-9	3	278390	189670	291440	253167	325390	284040	297320	302250	248460	226350	223980	232930	--	--
Lmbp000123	L-Homomethionine	Amino acids and derivatives	Amino acids and derivatives	25148-30-5	3	3482600	2821400	5159100	3.82103e+06	1329000	3628700	1542800	2.16683e+06	2859900	2952100	2837700	2.88323e+06	C17213	ko00966,ko01110,ko01210
mws1641	Lumazine	Nucleotides and derivatives	Nucleotides and derivatives	487-21-8	3	323170	33042	169000	175071	290030	340010	134650	254897	195170	153910	187980	179020	C03212	--
pme1439	p-Coumaric acid	Phenolic acids	Phenolic acids	501-98-4	2	446970	381990	521210	450057	706750	379340	722640	602910	453640	454760	479720	462707	C00811	ko00130,ko00350,ko00940,ko00950,ko00998,ko01100,ko01110
Lmbn002648	α-Hydroxycinnamic Acid*	Phenolic acids	Phenolic acids	5801-57-0	3	333840	375930	233170	314313	422970	434940	706150	521353	400900	415330	371870	396033	C02763	ko00360,ko01100
Lmbn002739	3-Hydroxycinnamic Acid*	Phenolic acids	Phenolic acids	14755-02-3	3	351450	404120	294700	350090	369990	372830	677540	473453	435480	424890	486240	448870	C12621	ko00360,ko01100
pmb0142	Caffeic aldehyde	Phenolic acids	Phenolic acids	141632-15-7	3	896190	775490	828190	833290	1042500	1108300	805940	985580	854800	863630	860450	859627	C10945	ko00940,ko01110
mws0159	Phenylpyruvic acid	Organic acids	Organic acids	156-06-9	3	5843900	5332000	4546000	5.24063e+06	6767300	7167300	8060200	7331600	6359600	6576100	6752900	6.56287e+06	C00166	ko00360,ko00400,ko00960,ko01100,ko01110,ko01210,ko01230
pme2435	L-Fucose	Others	Saccharides and Alcohols	2438-80-4	3	133500	110490	122660	122217	95226	117620	146530	119792	155870	171070	139680	155540	C01019	ko00051,ko00520,ko01100
mws0854	Rhamnose	Others	Saccharides and Alcohols	3615-41-6	3	119990	110010	93437	107812	135630	157340	151670	148213	148460	132780	121000	134080	C00507	ko00051,ko01100
MWS5238	4-Phenylbutyric acid	Organic acids	Organic acids	1821-12-1	3	607710	482960	443590	511420	649120	552390	599780	600430	565290	546510	511300	541033	--	--
pme3083	2-(Formylamino)benzoic acid	Phenolic acids	Phenolic acids	3342-77-6	3	756890	494650	453060	568200	348250	494860	296780	379963	428740	464480	429700	440973	C05653	ko00380,ko01100
pme2617	L-Methionine Sulfoxide	Amino acids and derivatives	Amino acids and derivatives	3226-65-1	3	490710	484350	546160	507073	379430	529400	415250	441360	455750	478690	460570	465003	C02989	ko00270
MWS4525	6-O-methylguanine	Nucleotides and derivatives	Nucleotides and derivatives	20535-83-5	2	2635200	1180900	1762500	1.85953e+06	1998500	2235100	1591800	1941800	1957100	1870300	1616600	1.81467e+06	--	--
pme3968	7-Methylguanine	Nucleotides and derivatives	Nucleotides and derivatives	578-76-7	3	1806500	983160	1466900	1.41885e+06	1358600	1579200	956330	1.29804e+06	1345600	1343500	1210900	1300000	C02242	--
pme0021	L-Phenylalanine	Amino acids and derivatives	Amino acids and derivatives	63-91-2	1	419190000	421460000	430220000	4.23623e+08	401650000	402100000	374590000	392780000	414680000	404640000	407510000	4.08943e+08	C00079	ko00360,ko00400,ko00460,ko00940,ko00960,ko00966,ko00970,ko00998,ko01100,ko01110,ko01210,ko01230,ko02010
MWSmce583	Piperonylic acid	Organic acids	Organic acids	94-53-1	3	157550	164730	173060	165113	310720	247920	164330	240990	135140	146180	154980	145433	--	--
Zmhn001420	5,7-Dihydroxy-1(3H)-isobenzofuranone	Phenolic acids	Phenolic acids	27979-58-4	2	256270	366460	376720	333150	270240	238430	312160	273610	288360	277100	281890	282450	--	--
pmc0274	6-Methylmercaptopurine	Nucleotides and derivatives	Nucleotides and derivatives	50-66-8	3	167250000	132760000	149490000	1.49833e+08	102860000	118870000	96042000	105924000	123890000	127200000	127740000	1.26277e+08	C16614	--
mws0344	D-Xylonic acid	Others	Saccharides and Alcohols	526-91-0	1	32478000	24211000	21519000	2.60693e+07	22371000	37593000	28124000	2.93627e+07	28946000	27711000	28183000	28280000	C00502	ko00040,ko01100
pme0166	1-Methylxanthine	Nucleotides and derivatives	Nucleotides and derivatives	6136-37-4	3	103930	117570	249290	156930	231030	171650	126960	176547	154640	159790	158610	157680	C16358	ko00232,ko01100,ko01110
pme2801	7-Methylxanthine	Nucleotides and derivatives	Nucleotides and derivatives	552-62-5	3	351350	526760	744450	540853	790010	773710	403580	655767	510460	575030	590370	558620	C16353	ko00232,ko01100,ko01110
Lmrn003000	2-Hydroxy-3-phenylpropanoic acid	Phenolic acids	Phenolic acids	7326-19-4	3	485970	551780	612060	549937	914340	619050	434960	656117	549330	596580	559170	568360	C05607	ko00360,ko00960,ko01100
Lmbn005172	2,6-Dimethoxybenzaldehyde	Phenolic acids	Phenolic acids	3392-97-0	3	122720	151600	82404	118908	88053	144580	111590	114741	102330	107420	121920	110557	--	--
mws0467	3-(4-Hydroxyphenyl)-propionic acid	Phenolic acids	Phenolic acids	501-97-3	3	184050	221100	85813	163654	157700	184280	153100	165027	149280	185230	171850	168787	C01744	--
Lmgp002595	4'-Hydroxy-3'-methoxyacetophenone (Acetovanillone)	Phenolic acids	Phenolic acids	498-02-2	3	437580	1119800	778390	778590	475620	693610	249900	473043	803960	687850	639530	710447	C11380	--
MWS0274	DL-3-Phenyllactic acid	Organic acids	Organic acids	828-01-3	3	143230	165620	57232	122027	92359	108110	96101	98856.7	126800	127770	99980	118183	--	--
MWSmce165	L-Fucitol	Others	Saccharides and Alcohols	13074-06-1	2	3002000	2838200	2725800	2.85533e+06	2019600	3241500	2362700	2.54127e+06	2641000	2426000	2711900	2.59297e+06	--	--
pmn001681	1-(4-Methoxyphenyl)-1-propanol	Phenolic acids	Phenolic acids	5349-60-0	3	538300	459240	409040	468860	627240	447170	428310	500907	483630	470190	489440	481087	--	--
Lmdp003146	Rhododendrol	Phenolic acids	Phenolic acids	501-96-2	2	1332600	664740	944190	980510	602860	807190	690970	700340	841010	542620	810470	731367	--	--
Zmjp000624	Pyridoxal	Others	Vitamin	66-72-8	3	2480700	2296500	2173700	2.31697e+06	5499900	4434000	5101100	5.01167e+06	3016500	3003200	2935800	2.98517e+06	C00250	ko00750,ko01100,ko01240
NK10253223	2-Amino-3-methoxybenzoic acid	Phenolic acids	Phenolic acids	3177-80-8	3	1539600	1412900	1385000	1.44583e+06	3399400	2641400	3236500	3.09243e+06	1800300	1857700	1820300	1826100	C05831	ko00380
mws2125	Phosphoenolpyruvate	Organic acids	Organic acids	138-08-9	3	3698900	2193100	2587200	2826400	3634400	4525200	4736200	4298600	2781900	3127400	2944400	2.95123e+06	C00074	ko00010,ko00020,ko00400,ko00440,ko00620,ko00710,ko00998,ko01100,ko01110,ko01200,ko01230,ko01240
Cmdn000784	Uric acid	Nucleotides and derivatives	Nucleotides and derivatives	69-93-2	1	93862	322670	262220	226251	20211	72429	24649	39096.3	105760	112290	86726	101592	--	--
pme2598	3,4-Dihydroxybenzeneacetic acid	Phenolic acids	Phenolic acids	102-32-9	3	13698000	26528000	14302000	18176000	7058900	27007000	9707600	1.45912e+07	19403000	17954000	18124000	1.84937e+07	C01161	ko00350,ko01100
MWSmce501	Protocatechuic Acid Methyl Ester	Phenolic acids	Phenolic acids	2150-43-8	3	165070	94454	189830	149785	163530	180210	103530	149090	136080	153760	172940	154260	--	--
pme1292	Homogentisic acid	Phenolic acids	Phenolic acids	451-13-8	3	9215300	18328000	16829000	1.47908e+07	5361300	28383000	4899900	12881400	15572000	15495000	13734000	1.49337e+07	C00544	ko00130,ko00350,ko01100,ko01240
Hmbp001276	Gallacetophenone	Phenolic acids	Phenolic acids	528-21-2	2	124140	159470	185040	156217	126320	155920	164610	148950	111440	154110	170110	145220	--	--
pme1383	Pyridoxine	Others	Vitamin	65-23-6	3	1708300	1844800	1401200	1.65143e+06	8485500	4478900	7607100	6.85717e+06	3479000	3443200	3550500	3490900	C00314	ko00750,ko01100,ko01240
pme0181	3-Methyl-L-Histidine*	Amino acids and derivatives	Amino acids and derivatives	368-16-1	3	1143400	875750	773700	930950	703200	697780	972960	791313	884710	963940	900900	916517	C01152	ko00340,ko01100
MWS0933	1-Methylhistidine*	Amino acids and derivatives	Amino acids and derivatives	332-80-9	3	794630	579130	349240	574333	493350	474140	497510	488333	638080	673160	571020	627420	--	--
pme3186	DL-Glyceraldehyde-3-phosphate	Organic acids	Organic acids	591-59-3	3	384290	112300	146800	214463	174920	302880	385960	287920	330600	297270	174190	267353	C00661	--
Zmzn000078	Dihydroxyacetone phosphate	Others	Saccharides and Alcohols	57-04-5	2	186580	175370	163730	175227	174020	130000	188280	164100	123560	137280	137640	132827	C00111	ko00010,ko00040,ko00051,ko00052,ko00561,ko00562,ko00564,ko00640,ko00710,ko00760,ko01100,ko01110,ko01200,ko01230
mws0024	Gallic acid	Phenolic acids	Phenolic acids	149-91-7	3	226960	318420	469260	338213	112970	523530	172220	269573	442230	310250	398070	383517	C01424	--
ML10176345	3-Dehydroshikimic acid	Organic acids	Organic acids	2922-42-1	2	1163100	796750	685380	881743	793250	875270	1438100	1035540	969110	827310	989390	928603	C02637	ko00400,ko01100,ko01110,ko01230,ko01240
pme0253	N-Acetyl-L-leucine	Amino acids and derivatives	Amino acids and derivatives	1188-21-2	3	327300	194270	220670	247413	175030	187440	127130	163200	182340	193320	192180	189280	C02710	--
pme3009	Trans-Citridic acid	Organic acids	Organic acids	4023-65-8	2	492720	505390	534540	510883	462310	477710	522260	487427	498700	523390	472410	498167	C02341	ko00660,ko01100
MA10039492	Dehydroascorbic acid	Others	Vitamin	490-83-5	2	729140	484310	617930	610460	786510	682350	771720	746860	608960	589780	668220	622320	C05422	ko00053,ko00480,ko01100
mws0154	Shikimic acid	Organic acids	Organic acids	138-59-0	3	1150100	691080	557440	799540	895880	894120	1479900	1.08997e+06	937770	980260	961380	959803	C00493	ko00400,ko01100,ko01110,ko01230,ko01240
Lmgn002091	2-Methyl-3-oxoadipic acid	Organic acids	Organic acids	-	1	18658000	15657000	6820400	13711800	2616900	5411900	3680000	3.90293e+06	9905400	7872100	8697100	8.82487e+06	C18307	--
Lmgn002184	2-Oxoheptanedionic acid	Organic acids	Organic acids	17126-90-8	1	2130500	1506200	1239400	1.62537e+06	1612700	2860100	1546500	2.00643e+06	2323700	2053900	2157000	2178200	C16588	ko01100,ko01210,ko01240
Lmgn002555	2-Propylglutaric acid	Organic acids	Organic acids	32806-62-5	2	328750	136000	217100	227283	284850	245980	421550	317460	233950	260370	172860	222393	C16658	--
mws0242	Suberic Acid	Organic acids	Organic acids	505-48-6	2	1379100	1085300	658540	1040980	429490	710320	386430	508747	606790	664080	589990	620287	C08278	--
Zmyn000155	N-α-Acetyl-L-ornithine	Amino acids and derivatives	Amino acids and derivatives	6205-08-9	3	1190700	1639800	5343900	2724800	739840	917810	989270	882307	2010600	1928600	1903200	1.94747e+06	C00437	ko00220,ko01100,ko01110,ko01210,ko01230
MWSmce119	L-Arginine	Amino acids and derivatives	Amino acids and derivatives	74-79-3	1	89877000	88622000	147910000	108803000	59494000	60170000	59572000	5.97453e+07	79532000	81779000	80329000	8.05467e+07	C00062	ko00220,ko00261,ko00330,ko00472,ko00970,ko01100,ko01110,ko01230,ko02010
pme0008	L-Citrulline	Amino acids and derivatives	Amino acids and derivatives	372-75-8	3	8134000	7201500	5098000	6.81117e+06	5690800	5744600	5632200	5689200	5788500	5546300	6102600	5.81247e+06	C00327	ko00220,ko01100,ko01110,ko01230
MWSmce690	Erythorbic Acid; Isoascorbic Acid	Others	Vitamin	89-65-6	2	285280	287880	183990	252383	304740	135800	228540	223027	239410	109910	235710	195010	--	--
Zmgn001448	2-Propylmalic Acid*	Organic acids	Organic acids	-	2	8815800	6613600	4433300	6620900	197350000	3028100	2495800	6.76246e+07	55623000	59600000	61687000	58970000	C05994	ko00620
Lmbn001754	3-Isopropylmalic Acid*	Organic acids	Organic acids	921-28-8	2	9616400	6846600	4825500	7.09617e+06	197610000	3185500	2473200	6.77562e+07	54961000	60830000	60979000	5.89233e+07	C04411	ko00290,ko01100,ko01110,ko01210,ko01230
pmb3101	2-Isopropylmalic Acid	Organic acids	Organic acids	49601-06-1	1	9836600	7109900	4954000	7.30017e+06	225100000	3498600	3020400	7.72063e+07	62286000	65929000	64438000	6.42177e+07	C02504	ko00290,ko00620,ko01100,ko01110,ko01210,ko01230
mws1500	Ethyl cinnamate	Phenolic acids	Phenolic acids	103-36-6	3	96476	79837	84868	87060.3	151490	143780	134920	143397	132890	100580	108750	114073	C06359	--
pme2253	L-Gulono-1,4-Lactone	Others	Saccharides and Alcohols	1128-23-0	2	172930	158060	106420	145803	103930	210510	165370	159937	204320	149510	198720	184183	C01040	ko00053,ko01100,ko01240
MWSmce220	D-Glucono-1,5-lactone	Organic acids	Organic acids	90-80-2	2	208640	203180	145640	185820	150140	375780	478550	334823	267970	180060	212700	220243	C00198	ko00030,ko01100,ko01110,ko01200
Lmgn000242	4,5,6-Trihydroxy-2-oxohexanoic acid	Organic acids	Organic acids	56742-44-0	3	91389	86270	72098	83252.3	77565	111180	113840	100862	103470	123900	112620	113330	C01216	ko00052,ko01100
mws1200	Trans-4-Hydroxycinnamic Acid Methyl Ester	Phenolic acids	Phenolic acids	19367-38-5	3	233470	427260	182840	281190	340300	198910	420040	319750	298110	299800	303330	300413	--	--
mws0009	Coniferaldehyde	Phenolic acids	Phenolic acids	20649-42-7	3	159430	97830	77330	111530	126260	129200	147810	134423	117140	115460	106170	112923	C02666	ko00940,ko01100,ko01110
mws1195	p-Coumaric acid methyl ester	Phenolic acids	Phenolic acids	3943-97-3	3	389270	608190	261940	419800	530660	278400	639970	483010	467350	445050	454760	455720	--	--
pmb2795	4-Methoxycinnamic acid	Phenolic acids	Phenolic acids	830-09-1	3	169830	304560	115720	196703	245030	139490	306880	230467	221260	222930	215770	219987	--	--
pme3255	Methyleugenol	Phenolic acids	Phenolic acids	93-15-2	3	542150	457200	606590	535313	441220	478210	531160	483530	468670	504060	517800	496843	C10454	ko00940
pmb0786	D-Glucosamine	Others	Saccharides and Alcohols	3416-24-8	3	257770	339580	301270	299540	319740	306870	294290	306967	279400	286670	347090	304387	C00329	ko00520,ko01100
MWSmce001	5-Acetylsalicylic acid	Phenolic acids	Phenolic acids	13110-96-8	3	177140	236260	277250	230217	280790	257310	261390	266497	200390	224440	233430	219420	--	--
mws2212	Caffeic acid	Phenolic acids	Phenolic acids	331-39-5	1	53512000	33709000	36018000	4.10797e+07	261450000	44361000	124120000	1.4331e+08	96530000	97261000	95217000	96336000	C01197	ko00940,ko01100,ko01110
Hmln000297	Inositol	Others	Saccharides and Alcohols	87-89-8	1	4934600	3950800	3978100	4.28783e+06	4441000	5383200	5407800	5.07733e+06	4058500	4260900	4882600	4.40067e+06	C00137	ko00052,ko00053,ko00562,ko01100,ko01110,ko02010,ko04070
mws1164	D-Fructose	Others	Saccharides and Alcohols	57-48-7	1	4434400	3614200	3526200	3.85827e+06	4483000	4837000	5070000	4.79667e+06	4202200	4106700	4228100	4179000	C05003	--
pmf0138	D-Mannose	Others	Saccharides and Alcohols	3458-28-4	3	4750100	4653700	3624300	4342700	4173900	5270700	5324300	4.92297e+06	4246500	3948700	4420300	4.20517e+06	C00159	ko00051,ko00052,ko00520,ko01100,ko02010
MWSmce576	L-Glucose	Others	Saccharides and Alcohols	921-60-8	1	4320600	3199000	3710800	3.74347e+06	4305800	4655600	5431900	4.79777e+06	3951600	3846100	3943900	3.91387e+06	--	--
mws4170	D-Glucose	Others	Saccharides and Alcohols	50-99-7	1	4251000	3538700	3514000	3767900	4176400	4663200	5194500	4.67803e+06	4053200	3935600	4132300	4.04037e+06	C00031	ko00010,ko00030,ko00052,ko00500,ko00520,ko00524,ko00901,ko01100,ko01110,ko02010
pmf0139	D-Galactose	Others	Saccharides and Alcohols	59-23-4	3	5237500	4075600	3878700	4.39727e+06	5426300	5647000	6450200	5.84117e+06	5235000	5079300	5076500	5.13027e+06	C00124	ko00052,ko01100
mws0093	Coniferyl alcohol	Phenolic acids	Phenolic acids	458-35-5	3	133520	160650	100950	131707	146560	131590	65595	114582	113000	140460	133360	128940	C00590	ko00940,ko00998,ko01100,ko01110
mws0250	L-Tyrosine	Amino acids and derivatives	Amino acids and derivatives	60-18-4	1	262690000	307530000	235320000	2.68513e+08	172630000	236110000	162710000	1.90483e+08	258090000	248640000	245460000	250730000	C00082	ko00130,ko00261,ko00350,ko00360,ko00400,ko00460,ko00730,ko00940,ko00950,ko00965,ko00966,ko00970,ko00998,ko01100,ko01110,ko01210,ko01230,ko01240
MWS3046	3-(3-Hydroxyphenyl)-3-hydroxypropanoic acid	Phenolic acids	Phenolic acids	3247-75-4	3	161350	105900	150980	139410	136110	98302	152860	129091	128160	143210	143280	138217	--	--
pme2237	Dulcitol	Others	Saccharides and Alcohols	608-66-2	3	983980	1433400	775800	1.06439e+06	867300	1140100	1088100	1.03183e+06	862530	920860	1022300	935230	C01697	ko00052,ko01100
mws0214	D-Sorbitol	Others	Saccharides and Alcohols	50-70-4	3	680590	955420	606470	747493	624830	760880	844840	743517	707190	666260	687100	686850	C00794	ko00051,ko00052,ko01100,ko02010
mws1155	D-Mannitol	Others	Saccharides and Alcohols	69-65-8	3	190790	217650	139040	182493	171670	183940	221880	192497	163660	175000	167160	168607	C00392	ko00051,ko01100,ko02010
pme2596	4-Pyridoxic acid	Others	Vitamin	82-82-6	3	1055600	1691800	1514000	1.42047e+06	1639500	1710000	1024200	1457900	1418000	1336500	1328900	1.36113e+06	C00847	ko00750,ko01100
MA10002917	2,4-Dinitrophenol	Phenolic acids	Phenolic acids	51-28-5	3	524850	632630	524560	560680	349050	383350	441340	391247	489250	519660	489450	499453	C02496	--
Lmrj001341	Cyclo(Ser-Pro)	Amino acids and derivatives	Amino acids and derivatives	-	3	207600	362150	458800	342850	346650	346500	233240	308797	295310	309560	288640	297837	--	--
pme2602	O-Phospho-L-serine	Amino acids and derivatives	Amino acids and derivatives	407-41-0	3	258950	227210	244940	243700	246210	181550	382040	269933	162920	178710	200520	180717	C01005	ko00260,ko00270,ko00970,ko01100,ko01110,ko01200,ko01230
Zmgn000447	3-Phospho-D-glyceric acid	Others	Saccharides and Alcohols	820-11-1	3	20203000	14119000	18298000	17540000	15113000	17632000	26519000	1.97547e+07	18851000	17990000	18490000	1.84437e+07	C00197	ko00010,ko00030,ko00260,ko00270,ko00561,ko00630,ko00710,ko01100,ko01110,ko01200,ko01230,ko01240
mws0752	Undecylic Acid	Lipids	Free fatty acids	112-37-8	3	1001800	1201900	1080000	1.09457e+06	1547400	1207200	1098600	1284400	1192100	1219600	1311500	1.24107e+06	C17715	--
pme0137	N-Acetyl-L-Glutamine	Amino acids and derivatives	Amino acids and derivatives	2490-97-3	2	2952400	3542800	5433700	3976300	2081000	3126500	2919900	2.70913e+06	2717900	3354600	2994400	3022300	--	--
pme2006	Diethyl glutarate	Organic acids	Organic acids	818-38-2	3	370040	382790	331190	361340	245760	502070	274850	340893	381700	362410	362200	368770	--	--
mws0237	Azelaic acid	Organic acids	Organic acids	123-99-9	1	15015000	26812000	23053000	2.16267e+07	10138000	15369000	8159400	1.12221e+07	16623000	16790000	16982000	1.67983e+07	C08261	--
mws0736	N-Glycyl-L-leucine*	Amino acids and derivatives	Amino acids and derivatives	869-19-2	3	1969300	1631100	1534100	1711500	1696500	1866700	1610400	1.72453e+06	1714000	1700000	1631200	1.68173e+06	C02155	--
pme0122	N6-Acetyl-L-lysine	Amino acids and derivatives	Amino acids and derivatives	692-04-6	3	855300	559220	799550	738023	355540	287870	451110	364840	441130	406580	426490	424733	C02727	ko00310,ko01100
mws5041	L-Glycyl-L-isoleucine*	Amino acids and derivatives	Amino acids and derivatives	19461-38-2	3	1596100	1342500	1232900	1390500	1387000	1470800	1104800	1.32087e+06	1192500	1366600	1293900	1.28433e+06	--	--
pme3388	Homoarginine	Amino acids and derivatives	Amino acids and derivatives	156-86-5	2	1191500	1458400	2539600	1.72983e+06	565290	486300	593480	548357	1340600	1062300	1115300	1.17273e+06	C01924	--
Zmjp000182	N-Monomethyl-L-arginine	Amino acids and derivatives	Amino acids and derivatives	17035-90-4	1	3880800	5666400	9933600	6493600	1928100	2018800	2190300	2.04573e+06	3491900	3740500	3977500	3.73663e+06	C03884	--
Zmdp000292	Arginine methyl ester	Amino acids and derivatives	Amino acids and derivatives	-	1	4138900	5373000	9399100	6.30367e+06	2386900	1889000	2133300	2136400	4059500	4029700	4007200	4.03213e+06	--	--
pmf0348	2,6-Dimethyl-7-octene-2,3,6-triol	Others	Saccharides and Alcohols	73815-21-1	3	1532000	2789900	2448900	2.25693e+06	1078600	1602600	823780	1.16833e+06	1719400	1713200	1652200	1.69493e+06	--	--
Zmzp000145	Trimethyllysine	Amino acids and derivatives	Amino acids and derivatives	23284-33-5	1	14026000	10162000	19707000	1.46317e+07	6744700	6489000	6585000	6.60623e+06	9044400	10152000	10158000	9784800	C03793	ko00310,ko01100
pme0075	N-Acetyl-L-glutamic acid	Amino acids and derivatives	Amino acids and derivatives	1188-37-0	2	2593500	1206400	1986800	1928900	1876600	2029000	1615600	1840400	1709600	2069900	1933700	1904400	C00624	ko00220,ko01100,ko01110,ko01210,ko01230
mws0193	L-Homocitrulline	Amino acids and derivatives	Amino acids and derivatives	1190-49-4	3	546120	447410	402710	465413	361760	250160	219860	277260	342280	356540	349300	349373	C02427	--
pme0278	2,6-Diaminooimelic acid	Organic acids	Organic acids	583-93-7	3	788580	723280	1724000	1078620	241850	523290	199020	321387	516960	573570	577320	555950	C00666	ko00300,ko01100,ko01110,ko01230
MWSslk140	N-Acetyl-L-Methionine	Amino acids and derivatives	Amino acids and derivatives	65-82-7	3	119400	117010	117140	117850	75328	96111	66923	79454	102340	102220	102550	102370	C02712	--
mws0281	Citric Acid	Organic acids	Organic acids	77-92-9	1	1148200000	1174500000	1025900000	1116200000	1146800000	1117600000	1161200000	1.14187e+09	1166300000	1195600000	1175500000	1.17913e+09	C00158	ko00020,ko00250,ko00630,ko01100,ko01110,ko01200,ko01210,ko01230,ko01240
Zmyn000453	Isocitric Acid	Organic acids	Organic acids	320-77-4	1	311420000	334510000	274400000	3.06777e+08	306900000	288370000	335230000	3.10167e+08	298220000	292220000	302890000	2.97777e+08	C00311	ko00020,ko00630,ko01100,ko01110,ko01200,ko01210,ko01230,ko01240
mws0277	Quinic Acid	Organic acids	Organic acids	77-95-2	2	136790000	151610000	128940000	1.39113e+08	133480000	132740000	138340000	1.34853e+08	138430000	128930000	123170000	1.30177e+08	C00296	ko00400,ko01100
mws1189	D-Galacturonic acid	Others	Saccharides and Alcohols	685-73-4	3	987780	959410	1103600	1016930	860620	1233800	986830	1.02708e+06	971530	966800	946610	961647	C00333	ko00040,ko00053,ko00520,ko01100,ko01240,ko02010
pme3705	D-Glucoronic acid	Others	Saccharides and Alcohols	6556-12-3	3	1052800	1023800	1141700	1.07277e+06	882250	1205900	1110500	1.06622e+06	1012300	941110	1066100	1.0065e+06	C00191	ko00040,ko00053,ko00520,ko00562,ko01100,ko01240
Xmgn006542	Dimethyl Phthalate	Phenolic acids	Phenolic acids	131-11-3	3	68794000	83274000	40068000	6.40453e+07	112070000	47396000	153510000	1.04325e+08	87839000	88349000	91118000	89102000	C11233	--
mws2208	Ferulic Acid	Phenolic acids	Phenolic acids	537-98-4	3	495950	377520	360370	411280	319340	432020	334900	362087	399590	373630	376230	383150	C01494	ko00940,ko01100,ko01110
Lmdn003756	Methyl caffeate	Phenolic acids	Phenolic acids	3843-74-1	1	117060	145470	168310	143613	109580	153150	86658	116463	122830	132590	112160	122527	C10477	--
pme0422	Isoferulic Acid	Phenolic acids	Phenolic acids	25522-33-2	3	468830	342590	396550	402657	307320	363470	307640	326143	292940	295580	288100	292207	C10470	--
mws2104	D-Pinitol	Others	Saccharides and Alcohols	10284-63-6	3	281680	192710	194830	223073	288680	277650	379090	315140	270170	255800	260590	262187	C03844	--
MWS1771	L-Tyrosine methyl ester	Amino acids and derivatives	Amino acids and derivatives	1080-06-4	2	1040600	806420	1037600	961540	574510	776860	447230	599533	663210	764680	753180	727023	C03404	--
pme0534	Gluconic acid	Others	Saccharides and Alcohols	526-95-4	1	4549400	4147100	4243500	4.31333e+06	3968100	8801900	4884700	5884900	4860300	4538000	5146600	4848300	C00257	ko00030,ko01100,ko01110,ko01200
MWSslk006	Ethyl Vanillate	Phenolic acids	Phenolic acids	617-05-0	3	574530	443340	535220	517697	499660	455530	566710	507300	498900	529720	550390	526337	--	--
pme3827	3,4-Dihydroxy-L-phenylalanine (L-Dopa)	Amino acids and derivatives	Amino acids and derivatives	59-92-7	3	4748100	5342900	2957400	4.34947e+06	1295700	4020600	1967500	2.42793e+06	3436100	4722400	2393300	3.51727e+06	C00355	ko00350,ko00950,ko00965,ko01100,ko01110
pmb2497	4-Hydroxy-3-methoxymandelate	Phenolic acids	Phenolic acids	55-10-7	3	216340	167360	333020	238907	193970	287620	228350	236647	229360	264600	284900	259620	C05584	ko00350,ko01100
Zmzn000079	D-Erythrose-4-phosphate	Others	Saccharides and Alcohols	585-18-2	3	718910	664910	608160	663993	420960	545950	486710	484540	550360	588670	594430	577820	C00279	ko00030,ko00400,ko00710,ko00750,ko00998,ko01100,ko01110,ko01200,ko01230,ko01240
pmb2640	Dodecanoic acid (Lauric acid)	Lipids	Free fatty acids	143-07-7	3	823050	1111900	933770	956240	1774200	1654100	1639900	1689400	1150400	1705700	2057300	1637800	C02679	ko00061,ko01100,ko01110
MWS0631	S-Sulfo-L-Cysteine	Amino acids and derivatives	Amino acids and derivatives	1637-71-4	3	175910	91166	70194	112423	70312	78448	87593	78784.3	126120	136600	132540	131753	C05824	ko00270,ko01100,ko01230
mws5037	L-Alanyl-L-leucine	Amino acids and derivatives	Amino acids and derivatives	3303-34-2	3	503240	577060	588130	556143	602280	550860	562660	571933	502030	578670	590480	557060	--	--
MWS5164	N,N'-Dimethylarginine;SDMA*	Amino acids and derivatives	Amino acids and derivatives	30344-00-4	2	1907800	2344500	4534600	2.92897e+06	1069500	1403900	1146700	1206700	1690700	1799000	1805600	1765100	--	--
NK10251888	NG,NG-Dimethyl-L-arginine*	Amino acids and derivatives	Amino acids and derivatives	30315-93-6	2	2148000	2424400	4704500	3092300	1190900	1638900	1092400	1307400	1875700	1914200	2050600	1.94683e+06	C03626	--
mws0282	L-Tryptophan	Amino acids and derivatives	Amino acids and derivatives	73-22-3	1	231340000	154600000	230240000	2.05393e+08	90708000	136930000	62648000	96762000	157010000	152380000	151290000	153560000	C00078	ko00260,ko00380,ko00400,ko00901,ko00966,ko00970,ko00998,ko01100,ko01110,ko01210,ko01230,ko01240
Zmtn001464	4,8-Dihydroxyquinoline-2-carboxylic acid	Organic acids	Organic acids	59-00-7	1	7915700	5723500	8347400	7.32887e+06	9973500	8091100	8250200	8771600	7759400	7686400	8154900	7866900	C02470	ko00380
Lmbn013410	2,4-Di-Tert-Butylphenol*	Phenolic acids	Phenolic acids	96-76-4	1	93902	144270	114570	117581	126900	141250	128650	132267	104500	147390	167670	139853	--	--
Lmln010063	2,6-Di-tert-butylphenol*	Phenolic acids	Phenolic acids	128-39-2	1	113490	143660	116600	124583	148490	146990	123470	139650	108490	146930	183980	146467	--	--
Zmgn002106	N-Acetyl-L-phenylalanine	Amino acids and derivatives	Amino acids and derivatives	2018-61-3	2	1247300	918670	1279200	1148390	1690500	1332100	1108800	1.37713e+06	1164000	1109300	1070700	1.11467e+06	C03519	ko00360,ko01100
Zmln000282	Hibiscus acid	Organic acids	Organic acids	6205-14-7	3	196480	128900	203870	176417	100770	247580	106480	151610	165710	187000	156400	169703	--	--
pmb2620	3,4-Dimethoxycinnamic acid	Phenolic acids	Phenolic acids	2316-26-9	3	104400	100730	58506	87878.7	145560	87703	165060	132774	117520	124000	114860	118793	--	--
mws1212	Ferulic acid methyl ester	Phenolic acids	Phenolic acids	2309-07-1	3	799440	1006700	477070	761070	813610	720350	955510	829823	868760	863800	841820	858127	--	--
MWSmce294	Elemicin	Phenolic acids	Phenolic acids	487-11-6	3	227830	232720	380950	280500	331440	339180	180560	283727	291070	280030	276240	282447	C10451	--
Zmpn000199	D-Galactaric acid	Others	Saccharides and Alcohols	526-99-8	1	1521200	1544100	2561500	1875600	2550100	2428600	1450400	2.14303e+06	1959800	1988800	2091200	2.01327e+06	C00879	ko00053,ko01100
Zmyn000108	D-Saccharic acid	Others	Saccharides and Alcohols	87-73-0	1	700720	697730	1052600	817017	979040	767540	640000	795527	745170	700070	702580	715940	C00818	ko00053,ko01100
Hmcn000192	Sedoheptulose	Others	Saccharides and Alcohols	3019-74-7	2	806380	1386000	974530	1.05564e+06	978260	1560900	688730	1.07596e+06	782900	903860	804740	830500	C02076	ko00710,ko01100
pme1654	Jasmonic acid	Organic acids	Organic acids	77026-92-7	3	11940000	7104700	8431400	9158700	4696300	10416000	4709900	6607400	8104900	7912600	8164200	8.06057e+06	C08491	ko00592,ko01100,ko01110,ko04075
pmb0128	δ-Tridecalactone	Lipids	Free fatty acids	7370-92-5	3	174910	116180	122600	137897	142770	335720	151180	209890	167250	176320	190910	178160	--	--
pmb2507	2-Deoxyribose-1-phosphate	Nucleotides and derivatives	Nucleotides and derivatives	17210-42-3	3	1370600	1471100	1498600	1.44677e+06	1190500	1125300	993110	1102970	1155300	1755300	1374300	1428300	C00672	ko00030,ko00240,ko01100
mws0863	2-Deoxyribose-5'-phosphate	Nucleotides and derivatives	Nucleotides and derivatives	102916-66-5	2	216110	97636	113400	142382	183170	124640	165440	157750	157790	105890	167610	143763	C00673	ko00030,ko01100
pmb2873	3-(2-Naphthyl)-L-alanine	Amino acids and derivatives	Amino acids and derivatives	58438-03-2	3	856080	1234000	798250	962777	734920	697690	566720	666443	739130	778530	723920	747193	--	--
MWS1900	Undecanedioic acid	Lipids	Free fatty acids	1852-04-6	3	120990	188810	224100	177967	181080	179740	147830	169550	193880	182470	176790	184380	--	--
mws1337	D-Pantothenic Acid	Others	Vitamin	79-83-4	1	88817000	99500000	80223000	8.95133e+07	75355000	79676000	85105000	8.00453e+07	85211000	82022000	80179000	8.24707e+07	C00864	ko00410,ko00770,ko01100,ko01110,ko01240
pme1228	5-Hydroxy-L-tryptophan	Amino acids and derivatives	Amino acids and derivatives	56-69-9	3	2819600	1614300	2523100	2319000	2099400	1917200	790130	1.60224e+06	2254600	2060700	2131200	2.14883e+06	C00643	ko00380,ko01100
mws2608	N-Acetyl-D-galactosamine	Others	Saccharides and Alcohols	1811-31-0	3	202300	209280	217870	209817	150480	213620	117900	160667	173280	218960	227460	206567	C01132	ko00052,ko01100
pme2755	N-Acetyl-D-glucosamine	Others	Saccharides and Alcohols	7512-17-6	3	845970	1094300	903370	947880	1151300	1006600	799180	985693	826100	862430	1170500	953010	C00140	ko00520,ko01100,ko02010
mws5042	L-Glycyl-L-phenylalanine	Amino acids and derivatives	Amino acids and derivatives	721-66-4	2	2788100	2456700	2176900	2473900	2164000	2807400	2074700	2348700	2297100	2330200	2191100	2272800	--	--
mws0520	N-Acetyl-L-tyrosine	Amino acids and derivatives	Amino acids and derivatives	537-55-3	3	213060	210000	210980	211347	232060	290070	141940	221357	195870	164150	187700	182573	--	--
pme0220	Methyl jasmonate	Organic acids	Organic acids	1211-29-6	3	397280	130680	179800	235920	126680	472260	147680	248873	278600	265310	250350	264753	C11512	ko00592,ko01110
Cmsp002787	3,4'-Dihydroxy-3',5'-dimethoxypropiophenone	Phenolic acids	Phenolic acids	136196-47-9	3	689100	901780	1021400	870760	373300	940010	206740	506683	692360	694620	552110	646363	--	--
Lmhp001430	Cyclo(Pro-Glu)	Amino acids and derivatives	Amino acids and derivatives	-	2	2952800	5488800	3906000	4.11587e+06	4056700	3557400	3474900	3.69633e+06	3312900	3439400	3316000	3356100	--	--
pmn001684	Tuberonic Acid	Organic acids	Organic acids	124649-26-9	2	377450	277760	262810	306007	241620	245910	285770	257767	252910	253270	291430	265870	--	--
HJAP051	3-(3,4,5-Trimethoxyphenyl)propan-1-ol	Phenolic acids	Phenolic acids	-	3	755080	739560	705350	733330	513690	1340700	857160	903850	728890	842810	791830	787843	--	--
pmb2643	Myristoleic acid	Lipids	Free fatty acids	544-64-9	1	8320.1	12088	12741	11049.7	10528	6350.1	4922.8	7266.97	6314.1	12085	10434	9611.03	C08322	--
MWStz100	Decitabine; 5-Aza-2'-Deoxycytidine	Nucleotides and derivatives	Nucleotides and derivatives	2353-33-5	3	81917	140930	108850	110566	153310	171750	129580	151547	111330	125890	129190	122137	--	--
Cmsp008043	Dihydropinosylvin methyl ether	Phenolic acids	Phenolic acids	17635-59-5	3	65915	114880	134300	105032	167230	133480	116360	139023	122860	111310	96789	110320	--	--
Lmhp001461	L-Prolyl-L-Leucine	Amino acids and derivatives	Amino acids and derivatives	52899-07-7	2	1251600	1230300	967780	1.14989e+06	765910	1043400	736210	848507	1019700	1034000	930670	994790	--	--
mws0119	Myristic Acid	Lipids	Free fatty acids	544-63-8	1	21135000	23789000	14508000	1.98107e+07	14865000	21489000	16575000	17643000	18970000	18358000	16652000	1.79933e+07	C06424	ko00061,ko01100
pma6455	Ribulose-5-phosphate	Others	Saccharides and Alcohols	4300-28-1	3	3359800	1689300	2578600	2.54257e+06	1879700	1934100	2378700	2.06417e+06	2391600	2285400	2509800	2395600	C00117	ko00030,ko00230,ko00440,ko00710,ko00750,ko01100,ko01110,ko01200,ko01230,ko01240
Lmhp001670	L-Valyl-L-Leucine	Amino acids and derivatives	Amino acids and derivatives	3989-97-7	2	1955400	2449800	2091500	2.16557e+06	1842600	2089200	1637500	1.85643e+06	1967300	1974000	1964800	1968700	--	--
pmb0962	L-Lysine-Butanoic Acid	Amino acids and derivatives	Amino acids and derivatives	80407-71-2	3	693000000	714860000	559370000	6.55743e+08	630690000	664150000	721630000	6.72157e+08	675410000	679810000	669770000	6.74997e+08	--	--
pme1313	N'-Formylkynurenine	Amino acids and derivatives	Amino acids and derivatives	1022-31-7	3	12787000	13850000	25404000	17347000	8571800	13041000	8061700	9891500	13609000	12142000	12649000	12800000	C02700	ko00380,ko01100,ko01240
mws4176	L-Alanyl-L-Phenylalanine	Amino acids and derivatives	Amino acids and derivatives	3061-90-3	2	661950	771680	890940	774857	494810	780500	499750	591687	708270	672920	673680	684957	--	--
Lmhn003240	Benzoylmalic acid	Phenolic acids	Phenolic acids	22138-51-8	3	348530	823600	625010	599047	499080	889220	265550	551283	569040	661060	592500	607533	--	--
Lmyn000160	Mucic acid Dimethyl Ester	Phenolic acids	Phenolic acids	-	1	4526800	3842300	3877000	4.08203e+06	4004700	5083800	4534800	4541100	4542800	4221400	4322800	4.36233e+06	--	--
Lmzn001925	3,4'-Dihydroxy-3'-methoxybenzenepentanoic acid	Phenolic acids	Phenolic acids	-	1	46753	63191	62798	57580.7	62348	90029	86401	79592.7	54915	77849	53292	62018.7	--	--
MWS0552	Cis-10-Pentadecenoic Acid(C15: 1)	Lipids	Free fatty acids	84743-29-3	1	73907	63238	67253	68132.7	84766	84731	91141	86879.3	105080	80751	88345	91392	--	--
pme2827	Palmitaldehyde	Lipids	Free fatty acids	629-80-1	3	64621000	58364000	52974000	58653000	81326000	59422000	54876000	65208000	60289000	61675000	59851000	60605000	C00517	ko00071
pme0264	Thymidine	Nucleotides and derivatives	Nucleotides and derivatives	50-89-5	2	178450	177130	155060	170213	43610	88534	83806	71983.3	115310	113780	132740	120610	C00214	ko00240,ko01100
MWS2430	13-methylmyristic acid	Lipids	Free fatty acids	2485-71-4	2	50939	89397	92459	77598.3	86931	151410	103270	113870	168950	84150	178790	143963	--	--
mws0359	Pentadecanoic Acid	Lipids	Free fatty acids	1002-84-2	3	206340	186090	140900	177777	270870	267600	138850	225773	110200	144130	166740	140357	C16537	--
ML10180524	Cytarabine	Nucleotides and derivatives	Nucleotides and derivatives	147-94-4	3	3725900	6226100	3161900	4371300	3184200	3441500	2716800	3.11417e+06	3133400	3878600	3456700	3.48957e+06	C02961	--
pme3732	Cytidine	Nucleotides and derivatives	Nucleotides and derivatives	65-46-3	3	1861800	3164500	2049300	2.35853e+06	2224500	3006000	1085700	2105400	1918800	1743000	2214600	1958800	C00475	ko00240,ko01100,ko02010
mws0248	Uridine	Nucleotides and derivatives	Nucleotides and derivatives	58-96-8	1	2629200	2492200	2620000	2.58047e+06	1973500	2392100	1254100	1.87323e+06	2030600	2196400	1934100	2053700	C00299	ko00240,ko01100,ko02010
MWSmce295	1-beta-D-Arabinofuranosyluracil	Nucleotides and derivatives	Nucleotides and derivatives	3083-77-0	2	305530	334470	228140	289380	317450	353180	222910	297847	319620	322650	354130	332133	C16908	--
mws0976	β-Pseudouridine	Nucleotides and derivatives	Nucleotides and derivatives	1445-07-4	3	244080	285210	209960	246417	184530	213820	159830	186060	176230	259170	179000	204800	C02067	ko00240,ko01100
pme2266	Biotin	Others	Vitamin	58-85-5	3	3004400	2633700	2640500	2.75953e+06	1819500	2316900	1837600	1.99133e+06	2336300	2192600	2252800	2.26057e+06	C00120	ko00780,ko01100,ko01240,ko02010
Lmmn005696	Desoxyhemigossypol	Phenolic acids	Phenolic acids	57765-65-8	3	183570	149750	132020	155113	238360	124330	155120	172603	209020	197850	188320	198397	--	--
MWS5231	Tridecanedioic acid	Lipids	Free fatty acids	505-52-2	1	857500	822430	938900	872943	901650	873190	830840	868560	1190500	1188800	1253000	1.21077e+06	--	--
Lmhp002031	L-Leucyl-L-Leucine	Amino acids and derivatives	Amino acids and derivatives	3303-31-9	1	1662000	1584000	1831200	1692400	1442700	1739900	1255400	1.47933e+06	1470900	1522500	1560600	1518000	--	--
mws0124	N-(3-Indolylacetyl)-L-alanine	Amino acids and derivatives	Amino acids and derivatives	57105-39-2	3	509210	319470	294140	374273	493860	465560	256510	405310	365260	349280	359480	358007	--	--
pmb2591	N-Acetyl-L-Tryptophan	Amino acids and derivatives	Amino acids and derivatives	1218-34-4	2	1725300	856880	877870	1153350	1245400	956260	728760	976807	1059600	922440	972770	984937	--	--
Lmrj002087	L-Isoleucyl-L-Aspartate	Amino acids and derivatives	Amino acids and derivatives	-	1	1453600	1589200	1663900	1568900	1348700	1327700	1071900	1.24943e+06	1402800	1338800	1267200	1.33627e+06	--	--
Zmdp001647	γ-Glutamyl-L-valine	Amino acids and derivatives	Amino acids and derivatives	-	1	1718000	722370	1377400	1272590	689540	402100	412710	501450	856790	807180	875960	846643	--	--
pme1306	Pyridoxine-5'-phosphate	Others	Vitamin	447-05-2	3	370050	457160	261130	362780	203090	230250	189240	207527	223090	230200	240970	231420	C00627	ko00750,ko01100,ko01240
pme3961	2'-Deoxyadenosine	Nucleotides and derivatives	Nucleotides and derivatives	958-09-8	2	6845000	4103900	5002200	5.31703e+06	3414700	3784100	3102800	3.43387e+06	4348900	4187700	4125800	4220800	C00559	ko00230,ko01100,ko02010
MWSmce116	5'-Deoxyadenosine	Nucleotides and derivatives	Nucleotides and derivatives	4754-39-6	2	1433200	1456100	1708800	1532700	1633700	1217400	989600	1.28023e+06	1343100	1251800	1393100	1.32933e+06	C05198	--
pme2776	2'-Deoxyinosine	Nucleotides and derivatives	Nucleotides and derivatives	890-38-0	3	479500	277640	366870	374670	259310	295370	232090	262257	311060	314100	338120	321093	C05512	ko00230,ko01100,ko02010
pma3101	Nicotinate D-ribonucleoside	Others	Vitamin	17720-18-2	3	1715900	1680000	1794000	1.72997e+06	1724800	1603600	820030	1382810	1423500	1550300	1481300	1.48503e+06	C05841	ko00760,ko01100
mws0120	Choline Alfoscerate	Lipids	PC	28319-77-9	1	61202000	53237000	76217000	63552000	25778000	42131000	30653000	32854000	51908000	48266000	48919000	4.96977e+07	C00670	ko00564,ko00565
MWS4412	Menadiol Diacetate	Others	Vitamin	573-20-6	3	731260	297340	435590	488063	353650	317900	407700	359750	471670	453290	514040	479667	--	--
MWSslk133	1,14-Tetradecanedioic Acid	Lipids	Free fatty acids	821-38-5	3	142790	121970	169380	144713	157600	143840	127360	142933	203870	205510	199440	202940	--	--
Zmyn000110	D-Glucosamine 1-phosphate	Others	Saccharides and Alcohols	2152-75-2	2	744330	679200	831690	751740	213720	428780	338430	326977	565510	522070	550320	545967	C06156	ko00520,ko01100
mws1090	Glucose-1-phosphate	Others	Saccharides and Alcohols	59-56-3	1	4163600	2041500	2903100	3.03607e+06	2631900	4079700	3144600	3285400	2908900	2829400	2505000	2.74777e+06	C00103	ko00010,ko00040,ko00052,ko00500,ko00520,ko00523,ko00561,ko01100,ko01110,ko01240
mws0866	D-Glucose 6-phosphate	Others	Saccharides and Alcohols	56-73-5	1	9190500	6313900	5725500	7.07663e+06	5127100	6924800	5894400	5982100	6209900	6342500	6275900	6276100	C00092	ko00500,ko00524,ko00562,ko00998,ko01100,ko01110
MWS2442	D-Fructose 6-Phosphate	Others	Saccharides and Alcohols	643-13-0	1	6034800	4570900	4108600	4.90477e+06	3830800	4553700	4078500	4.15433e+06	3778800	4038000	4494000	4103600	C00085	ko00052,ko00500,ko00710,ko01100,ko01110,ko01200
Zmdp002216	L-γ-Glutamyl-L-leucine	Amino acids and derivatives	Amino acids and derivatives	2566-39-4	1	4592800	1586700	3139200	3.10623e+06	1174700	1086400	1062600	1107900	2108800	2072900	2020900	2.06753e+06	--	--
MWS4309	Glycyl-tryptophan	Amino acids and derivatives	Amino acids and derivatives	2390-74-1	3	1256500	984770	798930	1013400	1139100	1151600	1107100	1132600	991780	934990	1034400	987057	--	--
Zmpn000095	Sorbitol-6-phosphate	Others	Saccharides and Alcohols	20479-58-7	3	172600	214540	208520	198553	223650	144780	161560	176663	188400	167140	177980	177840	C01096	ko00051,ko01100
Lmhp001732	L-Prolyl-L-Phenylalanine	Amino acids and derivatives	Amino acids and derivatives	13589-02-1	3	277880	211230	168860	219323	370310	312030	239010	307117	208570	263030	293080	254893	--	--
Lmtn004049	Abscisic acid	Organic acids	Organic acids	21293-29-8	3	305820	212360	279620	265933	244460	112970	275390	210940	229700	219990	245300	231663	C06082	ko00906,ko01100,ko01110,ko04075
Lmhp002001	L-Valyl-L-Phenylalanine	Amino acids and derivatives	Amino acids and derivatives	3918-92-1	3	1039900	1366300	1129600	1178600	717430	982280	698870	799527	969350	962900	980950	971067	--	--
pme1184	2'-Deoxyguanosine	Nucleotides and derivatives	Nucleotides and derivatives	961-07-9	3	377050	562320	536440	491937	255520	497820	246040	333127	314530	430680	352140	365783	C00330	ko00230,ko01100,ko02010
pme0230	Adenosine	Nucleotides and derivatives	Nucleotides and derivatives	58-61-7	1	346650000	353530000	369020000	356400000	356540000	368930000	343700000	356390000	361000000	347060000	364330000	3.57463e+08	C00212	ko00230,ko01100,ko02010
pme2890	L-Homocystine	Amino acids and derivatives	Amino acids and derivatives	626-72-2	3	142320	126870	135430	134873	151670	199180	163380	171410	139470	129030	144990	137830	C01817	ko00270
mws1060	9-(Arabinosyl)hypoxanthine	Nucleotides and derivatives	Nucleotides and derivatives	7013-16-3	1	19635000	16959000	8754000	15116000	12234000	15666000	9624700	1.25082e+07	12253000	14131000	13798000	13394000	--	--
pme1119	Inosine	Nucleotides and derivatives	Nucleotides and derivatives	58-63-9	3	435000	334620	187240	318953	321910	291060	186320	266430	276860	354120	416300	349093	C00294	ko00230,ko01100,ko02010
pmp000086	1-Feruloyl-sn-glycerol*	Phenolic acids	Phenolic acids	-	3	81610	96764	149380	109251	408650	130930	82298	207293	173610	182000	164410	173340	--	--
pmp000087	2-Feruloyl-sn-glycerol*	Phenolic acids	Phenolic acids	-	3	169930	362300	250350	260860	361140	131150	119290	203860	229920	255450	255070	246813	--	--
mws0383	10-Heptadecenoic Acid	Lipids	Free fatty acids	29743-97-3	2	1386800	1476000	987400	1283400	336360	797040	327410	486937	850850	840000	949430	880093	--	--
mws1297	Benzyl glucoside	Phenolic acids	Phenolic acids	4304-12-5	1	1329900	1778600	1315500	1.47467e+06	387230	1900600	602750	963527	1172700	1152900	1200500	1.17537e+06	--	--
pmf0293	1-Octadecanol	Lipids	Free fatty acids	112-92-5	3	1512200	1624800	1747100	1.62803e+06	1660400	1594600	1752400	1.66913e+06	1641300	1689200	1808000	1.71283e+06	--	--
pmp001257	Tridecanoylglycine	Amino acids and derivatives	Amino acids and derivatives	-	3	431790	338630	319400	363273	239830	204700	280210	241580	298280	346340	350650	331757	--	--
MWSmce675	Arbutin	Phenolic acids	Phenolic acids	497-76-7	1	1147400	1224400	1226100	1199300	1003800	858540	815230	892523	970530	967630	1022500	986887	C06186	ko00010
Lmmn003323	2-Hydroxyhexadecanoic acid	Organic acids	Organic acids	764-67-0	1	2675400	1956600	1892600	2.17487e+06	986830	1200600	662450	949960	1432700	1527200	1500400	1.48677e+06	--	--
pmp001264	Hexadecylsphingosine	Lipids	Sphingolipids	-	3	52556000	59103000	44283000	5.19807e+07	54548000	52373000	50813000	52578000	58897000	58658000	58278000	58611000	--	--
MWSmce356	L-Canavanine sulfate	Amino acids and derivatives	Amino acids and derivatives	2219-31-0	3	4384600	5417900	3472300	4.42493e+06	4382400	5107100	6717800	5.40243e+06	4221200	4115500	4000100	4.11227e+06	--	--
Lmrj002793	Cyclo(Phe-Glu)	Amino acids and derivatives	Amino acids and derivatives	-	3	216620	252670	279170	249487	153180	203080	140270	165510	191370	201620	185780	192923	--	--
pme1712	L-Saccharopine	Amino acids and derivatives	Amino acids and derivatives	997-68-2	3	215300	263840	330060	269733	85230	95116	126970	102439	175140	170740	170180	172020	C00449	ko00300,ko00310,ko01100,ko01110,ko01230
YC512117	Stearidonic acid	Lipids	Free fatty acids	20290-75-9	3	377430	115400	158600	217143	68077	108640	67300	81339	179050	149550	142170	156923	C16300	ko00592,ko01110
pmb1574	9,12-Octadecadien-6-Ynoic Acid	Lipids	Free fatty acids	61481-29-6	3	475280	1090900	588690	718290	355370	421120	291460	355983	496690	518080	535850	516873	--	--
Zmdp001663	γ-glutamylmethionine	Amino acids and derivatives	Amino acids and derivatives	17663-87-5	3	456250	132370	350460	313027	131410	123260	62042	105571	172020	217570	186330	191973	--	--
Lmlp012720	Dibutyl phthalate*	Phenolic acids	Phenolic acids	84-74-2	1	51671000	57520000	52502000	5.38977e+07	51453000	52175000	57666000	5.37647e+07	47553000	54010000	62073000	5.45453e+07	C14214	--
MWSmce341	Butyl isobutyl phthalate*	Phenolic acids	Phenolic acids	17851-53-5	1	47942000	53580000	58795000	53439000	61084000	51076000	50450000	5.42033e+07	52878000	47085000	66247000	5.54033e+07	--	--
Lmxp011770	Diisobutyl phthalate*	Phenolic acids	Phenolic acids	84-69-5	1	59631000	59268000	55203000	58034000	47655000	53975000	60406000	54012000	49694000	47267000	50038000	4.89997e+07	C15205	--
mws5035	L-Leucyl-L-phenylalanine	Amino acids and derivatives	Amino acids and derivatives	56217-82-4	2	99772	249040	189480	179431	100390	128240	70444	99691.3	148380	112370	113780	124843	--	--
pmb0889	Punicic acid (9Z,11E,13Z-octadecatrienoic acid)	Lipids	Free fatty acids	544-72-9	3	8747400	18696000	13756000	1.37331e+07	6020800	11549000	5270000	7.61327e+06	11258000	10920000	11206000	11128000	C08364	--
pmb1650	Octadeca-11E,13E,15Z-trienoic acid	Lipids	Free fatty acids	25575-00-2	3	31004000	51173000	35219000	39132000	45119000	53195000	33484000	4.39327e+07	37111000	42287000	35141000	3.81797e+07	--	--
mws0367	α-Linolenic Acid*	Lipids	Free fatty acids	463-40-1	1	320520000	329710000	363370000	3.37867e+08	232080000	295460000	289690000	272410000	328780000	332620000	343080000	3.34827e+08	C06427	ko00592,ko01040,ko01100,ko01110
mws0366	γ-Linolenic Acid*	Lipids	Free fatty acids	506-26-3	1	365770000	351120000	402860000	373250000	266450000	325450000	318880000	3.03593e+08	378440000	369700000	381450000	376530000	C06426	ko00591,ko01040,ko01100
Lmbn005923	Crepenynic acid	Lipids	Free fatty acids	2277-31-8	1	1528700	1635700	1744900	1.63643e+06	1086600	1402600	1313700	1.26763e+06	1587200	1523400	1677500	1.59603e+06	C07289	ko00591
mws0629	L-Aspartyl-L-Phenylalanine	Amino acids and derivatives	Amino acids and derivatives	13433-09-5	2	694310	626850	561360	627507	544310	691050	521390	585583	622790	572270	630200	608420	--	--
Lmbn006152	(9Z,11E)-Octadecadienoic acid	Lipids	Free fatty acids	2540-56-9	1	103650	75217	111340	96735.7	67080	79539	83969	76862.7	92444	95041	91481	92988.7	C04056	ko00591
mws1491	Linoleic acid	Lipids	Free fatty acids	60-33-3	3	57801000	39640000	52072000	4.98377e+07	38431000	47121000	48595000	4.47157e+07	46096000	47462000	54590000	4.93827e+07	C01595	ko00591,ko01040,ko01100
Hmhp001812	2'-O-Methyladenosine	Nucleotides and derivatives	Nucleotides and derivatives	2140-79-6	3	3703400	3470500	3534700	3.56953e+06	2122300	3664900	1635000	2.47407e+06	2935600	2992500	2934500	2954200	--	--
MWS4354	N6-methyladenosine	Nucleotides and derivatives	Nucleotides and derivatives	1867-73-8	3	1518400	1635500	1447100	1.53367e+06	797270	1396600	605690	933187	1167700	1089800	1047200	1.10157e+06	--	--
YC512118	Oleamide (9-Octadecenamide)	Lipids	Free fatty acids	301-02-0	1	568260	3184700	1640300	1.79775e+06	1536800	1568500	659960	1.25509e+06	1515800	1628600	1548900	1.56443e+06	C19670	--
mws2623	11-Octadecanoic acid(Vaccenic acid)	Lipids	Free fatty acids	506-17-2	3	26977000	28973000	17826000	24592000	8330100	13625000	9354100	10436400	16918000	18612000	18956000	18162000	C21944	--
Lmyn012331	Petroselinic acid	Lipids	Free fatty acids	593-39-5	1	24874000	26143000	17913000	2.29767e+07	7705200	13652000	9253700	1.02036e+07	17814000	17840000	18501000	1.80517e+07	C08363	--
mws0396	Elaidic Acid	Lipids	Free fatty acids	112-79-8	1	76501000	80430000	53356000	7.00957e+07	22925000	45575000	27660000	3.20533e+07	56421000	55790000	58759000	56990000	C01712	--
pme1178	Guanosine	Nucleotides and derivatives	Nucleotides and derivatives	118-00-3	1	58940000	50170000	44137000	5.10823e+07	47085000	43247000	30635000	4.03223e+07	42278000	48803000	43148000	44743000	C00387	ko00230,ko01100,ko02010
MWSmce333	Crotonoside; 2-Hydroxyadenosine	Nucleotides and derivatives	Nucleotides and derivatives	1818-71-9	3	3241300	2213900	3074100	2843100	3179900	2564300	1748800	2.49767e+06	2655000	2902100	2581000	2712700	C08432	--
Hmqp002567	4-Hydroxycinnamic acid p-hydroxyphenethylamine	Phenolic acids	Phenolic acids	-	1	2116600	113070000	129100000	8.14289e+07	53324000	53042000	1403300	35923100	66534000	65626000	64398000	6.55193e+07	--	--
mws0668	Xanthosine	Nucleotides and derivatives	Nucleotides and derivatives	146-80-5	1	38418000	22514000	17293000	26075000	20446000	25835000	17569000	2.12833e+07	21659000	21879000	22266000	2.19347e+07	C01762	ko00230,ko00232,ko01100,ko01110,ko02010
mws1489	Stearic Acid	Lipids	Free fatty acids	57-11-4	2	96031000	62126000	62793000	73650000	109520000	82107000	76748000	8.94583e+07	37030000	35433000	32226000	3.48963e+07	C01530	ko00061,ko01040
pma1751	N-(beta-D-Glucosyl)nicotinate	Others	Vitamin	-	3	3076400	1052600	12259000	5.46267e+06	9187900	10840000	7397000	9.14163e+06	6963200	6739800	6860200	6854400	--	--
MWSslk132	Hexadecanedioic acid	Lipids	Free fatty acids	505-54-4	3	750060	958950	593050	767353	518340	502790	399100	473410	654780	679340	688350	674157	C19615	ko00073,ko01100
pme2289	Retinol (Vitamin A1)	Others	Vitamin	68-26-8	3	1077900	1142600	1240300	1153600	1171000	1084100	1072400	1.10917e+06	935200	942060	964130	947130	C00473	ko01100,ko01240
Zmyn005252	3-Hydroxy-palmitic acid methyl ester	Lipids	Free fatty acids	51883-36-4	1	22396	17652	22955	21001	27323	22665	17596	22528	18542	17149	17861	17850.7	C11849	--
Lmyn007883	9,16-Dihydroxypalmitic acid	Lipids	Free fatty acids	38076-49-2	3	7661100	7787100	3692700	6380300	3918100	4154200	4690000	4254100	6910200	6357500	6257600	6.50843e+06	--	--
pmn001686	10,16-Dihydroxypalmitic acid	Lipids	Free fatty acids	3233-90-7	1	230330	225620	103700	186550	109860	123440	134700	122667	185290	200080	186830	190733	C08285	ko00073
pmb3081	Glucarate O-Phosphoric acid	Others	Saccharides and Alcohols	-	3	846950	795380	1110000	917443	1077100	906390	875610	953033	838680	941690	782120	854163	--	--
pme3163	D-Sedoheptuiose 7-phosphate	Others	Saccharides and Alcohols	2646-35-7	3	11874000	4290200	6776300	7.64683e+06	5985900	6306500	8162300	6.81823e+06	7077700	7033600	7576100	7.22913e+06	--	--
pmb2657	Argininosuccinic acid	Organic acids	Organic acids	2387-71-5	3	2419700	1198800	1503400	1707300	1539000	1197200	1730000	1.48873e+06	1527300	1568400	1581600	1559100	C03406	ko00220,ko00250,ko01100,ko01110,ko01230
pmb0885	4-Oxo-9Z,11Z,13E,15E-Octadecatetraenoic Acid	Lipids	Free fatty acids	-	3	1394300	1070600	1321500	1.26213e+06	963470	1119700	770960	951377	1244600	1273100	1224800	1247500	--	--
Zmyn004548	12-Oxo-phytodienoic acid	Lipids	Free fatty acids	85551-10-6	3	301490	344970	219190	288550	89186	205200	107880	134089	287980	284510	282230	284907	C01226	ko00592,ko01100,ko01110
MWSmce689	Methyl linolenate	Lipids	Free fatty acids	301-00-8	1	18970000	25107000	23535000	2.25373e+07	9098600	17257000	12247000	1.28675e+07	17980000	17131000	17107000	17406000	--	--
Zmdn001564	γ-Glutamylphenylalanine	Amino acids and derivatives	Amino acids and derivatives	7432-24-8	3	2559400	745510	715420	1340110	121470	549840	174950	282087	620470	657590	630320	636127	--	--
Zmyn004676	17-Hydroxylinolenic acid	Lipids	Free fatty acids	-	1	3225700	8140400	4694100	5353400	1834300	5089800	1616200	2.84677e+06	4640600	4747800	5249100	4.87917e+06	C16346	ko00592
Hmqn004825	Rabdosia acid A	Lipids	Free fatty acids	-	1	950930	1158600	436010	848513	204380	468700	328340	333807	685890	718660	728170	710907	--	--
pmb2786	9-Hydroxy-10,12,15-octadecatrienoic acid	Lipids	Free fatty acids	89886-42-0	1	699060	866380	338620	634687	182050	324920	237730	248233	531230	499750	582030	537670	C16326	ko00592
pmb2787	9-Oxo-10E,12Z-octadecadienoic acid	Lipids	Free fatty acids	54232-59-6	3	931420	1096000	429460	818960	212120	469160	312690	331323	692480	736060	702080	710207	C14766	ko00591
Lmbn005443	13-KODE; (9Z,11E)-13-Oxooctadeca-9,11-dienoic acid	Lipids	Free fatty acids	54739-30-9	1	671610	813130	337130	607290	174560	328510	223560	242210	511340	528850	551770	530653	C14765	ko00591
Zmpn003368	13S-Hydroxy-9Z,11E,15Z-octadecatrienoic acid	Lipids	Free fatty acids	87984-82-5	2	14040000	18227000	14288000	1.55183e+07	9864500	13035000	11281000	11393500	16288000	15875000	16154000	1.61057e+07	C16316	ko00592
Lmqp000329	5-Aminoimidazole ribonucleotide	Nucleotides and derivatives	Nucleotides and derivatives	25635-88-5	1	39241000	34442000	45600000	39761000	15428000	25120000	18735000	19761000	30871000	28020000	31164000	3.00183e+07	--	--
Hmqp005455	15(R)-Hydroxylinoleic Acid	Lipids	Free fatty acids	177931-23-6	2	287170	859880	261670	469573	107090	287940	108820	167950	323300	266890	287880	292690	--	--
Hmqp005411	9-Oxo-12Z-Octadecenoic acid	Lipids	Free fatty acids	112543-32-5	2	294800	864530	241990	467107	88969	285690	66249	146969	292420	312960	299720	301700	--	--
Rfmb091	9S-Hydroxy-10E,12Z-octadecadienoic acid*	Lipids	Free fatty acids	15514-85-9	1	6173200	12859000	8432500	9154900	3700800	7273000	3939500	4971100	7761600	7801500	8012300	7.85847e+06	C14767	ko00591
Lmbn005369	13(S)-HODE;13(S)-Hydroxyoctadeca-9Z,11E-dienoic acid*	Lipids	Free fatty acids	10219-69-9	1	6247900	12506000	8594600	9.11617e+06	3826200	7075000	3932300	4944500	7878400	8226900	8316700	8.14067e+06	C14762	ko00591
pmb2799	12,13-Epoxy-9-Octadecenoic Acid	Lipids	Free fatty acids	6799-85-5	1	58408	60451	51145	56668	10710	29901	13685	18098.7	32535	34045	38656	35078.7	C14826	ko00591,ko01100
pme1474	5'-Deoxy-5'-(methylthio)adenosine	Nucleotides and derivatives	Nucleotides and derivatives	2457-80-9	1	207740000	129070000	145870000	1.60893e+08	191350000	163620000	172180000	1.75717e+08	165100000	167310000	160660000	1.64357e+08	C00170	ko00270,ko00908,ko01100
pmb0197	N7-Methylguanosine	Nucleotides and derivatives	Nucleotides and derivatives	20244-86-4	3	643470	988240	1022700	884803	705100	856920	560900	707640	790170	723340	713380	742297	C20674	--
Zmyn004714	Ricinoleic acid	Lipids	Free fatty acids	141-22-0	2	576310	698230	518350	597630	532910	525910	451070	503297	611600	656810	721540	663317	C08365	--
pmf0297	1-Eicosanol	Lipids	Free fatty acids	629-96-9	3	564190	702780	495570	587513	534070	510950	437430	494150	574390	600340	674800	616510	--	--
Zmhn001926	1-O-Salicyloyl-β-D-glucose	Phenolic acids	Phenolic acids	60517-74-0	1	75744000	98439000	76110000	83431000	12734000	165120000	35021000	7.09583e+07	75852000	74882000	79144000	76626000	--	--
Zmhn001358	4-O-Glucosyl-4-hydroxybenzoic acid	Phenolic acids	Phenolic acids	-	1	66568000	93595000	68919000	7.63607e+07	11895000	153170000	31182000	6.54157e+07	71670000	71454000	70399000	7.11743e+07	--	--
pmb3142	Salicylic acid-2-O-glucoside	Phenolic acids	Phenolic acids	10366-91-3	3	2357900	2746300	2790600	2631600	4681900	3414200	3116300	3.73747e+06	3009400	3019900	3069400	3032900	--	--
Hmtn001302	Glucosyloxybenzoic acid	Phenolic acids	Phenolic acids	-	1	73672000	100930000	71384000	8.19953e+07	11767000	159270000	33232000	6.80897e+07	71700000	76254000	70150000	7.27013e+07	--	--
Zmyn005384	2R-Hydroxyoctadecanoic Acid	Lipids	Free fatty acids	26633-48-7	2	336970	338210	356780	343987	179960	196960	186440	187787	227040	210150	218840	218677	C03042	--
MWS4295	DL-2-hydroxystearic acid	Lipids	Free fatty acids	629-22-1	2	310220	288900	370980	323367	185790	185730	194810	188777	253660	265700	230900	250087	--	--
Lmqn008288	3-Hydroxyoctadecanoic Acid	Lipids	Free fatty acids	45261-96-9	2	426730	535710	491440	484627	272440	508610	319920	366990	532950	631010	632630	598863	--	--
pmb3079	N-Acetyl-D-glucosamine-1-phosphate	Others	Saccharides and Alcohols	6866-69-9	3	1161700	915320	845220	974080	625550	976800	695010	765787	909430	835860	877460	874250	C04256	--
Hmqn000843	Tachioside	Phenolic acids	Phenolic acids	109194-60-7	2	1183200	1089400	1350900	1.20783e+06	1538500	951050	1238700	1242750	1082100	1262500	1187400	1.17733e+06	--	--
Hmsn002598	Salirepin	Phenolic acids	Phenolic acids	26652-12-0	3	1031700	1521400	1250200	1.26777e+06	610480	1675600	599280	961787	930700	1020100	1113200	1.02133e+06	--	--
MWSmce549	1-Monomyristin	Lipids	Free fatty acids	589-68-4	2	32089	42528	26239	33618.7	28436	31124	32447	30669	23836	26944	34095	28291.7	--	--
pmb2855	L-Glutamine-O-glycoside	Amino acids and derivatives	Amino acids and derivatives	-	3	222790	109850	268030	200223	82823	126210	50217	86416.7	170260	172270	150420	164317	--	--
pmn001610	Eicosadienoic acid	Lipids	Free fatty acids	5598-38-9	3	626070	882490	955660	821407	319240	410670	559400	429770	711630	754880	798400	754970	C16525	ko01040
pmb2857	L-Glutamic acid-O-glycoside	Amino acids and derivatives	Amino acids and derivatives	-	3	384170	152400	336310	290960	289960	477980	183440	317127	335500	303640	299900	313013	--	--
pmb2791	9-Hydroperoxy-10E,12,15Z-octadecatrienoic acid	Lipids	Free fatty acids	111004-08-1	3	377590	435340	381370	398100	145110	270040	165790	193647	428820	370970	387150	395647	C16321	ko00592,ko01110
Zmdp001857	γ-Glutamyltyrosine	Amino acids and derivatives	Amino acids and derivatives	7432-23-7	3	5327800	4264600	3443000	4.34513e+06	829320	2499900	505630	1.27828e+06	2575300	2408800	2540200	2508100	--	--
pmn001606	Eicosenoic acid	Lipids	Free fatty acids	26764-41-0	3	585280	318590	726130	543333	729190	765510	535670	676790	526400	669510	523660	573190	C16526	ko01040
pme3967	2-(Dimethylamino)guanosine	Nucleotides and derivatives	Nucleotides and derivatives	2140-67-2	1	56474000	82432000	70265000	6.97237e+07	48362000	84134000	40649000	57715000	61982000	61350000	57193000	60175000	--	--
Lmcp002302	N6-(2-Hydroxyethyl)adenosine	Nucleotides and derivatives	Nucleotides and derivatives	4338-48-1	1	51867000	70864000	62069000	61600000	41021000	78951000	34584000	5.15187e+07	55687000	51669000	51298000	5.28847e+07	--	--
Lmhn001477	2-Caffeoyl-L-tartaric acid (Caftaric acid)	Phenolic acids	Phenolic acids	67879-58-7	3	422310	425260	363590	403720	316020	519510	304550	380027	380320	357180	396780	378093	--	--
mws0636	L-Phenylalanyl-L-phenylalanine	Amino acids and derivatives	Amino acids and derivatives	2577-40-4	3	263480	249270	274690	262480	245700	271960	224390	247350	226530	254930	252810	244757	--	--
MWS80007	13-Hydroperoxy-9Z,11E-octadecadienoic acid*	Lipids	Free fatty acids	23017-93-8	2	1060700	2350100	955900	1.45557e+06	356910	831680	396510	528367	1138600	1165700	1232200	1.17883e+06	--	--
Lmbn005287	7S,8S-DiHODE; (9Z,12Z)-(7S,8S)-Dihydroxyoctadeca-9,12-dienoic acid*	Lipids	Free fatty acids	143288-65-7	2	1058800	2431100	941090	1.477e+06	365540	861550	369430	532173	1067300	1201800	1206400	1158500	C07354	ko00591
Rfmb087	9-Hydroxy-13-oxo-10-octadecenoic Acid	Lipids	Free fatty acids	-	3	136720	244920	400240	260627	81030	265640	64710	137127	422130	260840	412340	365103	--	--
pmb2804	13S-Hydroperoxy-9Z,11E-octadecadienoic acid	Lipids	Free fatty acids	33964-75-9	3	189350	430850	495370	371857	96329	230400	71579	132769	274490	268390	266810	269897	C04717	ko00591,ko01100
pmn001689	9-Hydroxy-12-oxo-15(Z)-octadecenoic acid	Lipids	Free fatty acids	-	3	622550	461160	1844200	975970	305440	697390	111560	371463	1031700	1070900	997100	1.03323e+06	C21924	ko00592,ko01110
Zmjn004133	9S-Hydroperoxy-10E,12Z-octadecadienoic acid	Lipids	Free fatty acids	5502-91-0	3	198370	496580	359470	351473	140940	199110	87488	142513	276910	287820	289880	284870	C14827	ko00591,ko01100
MWS80006	9-Hydroperoxy-9Z,11E-Octadecadienoic Acid	Lipids	Free fatty acids	-	2	412610	941190	437070	596957	151400	354140	159560	221700	493310	508430	470810	490850	--	--
Lmbn004685	5S,8R-DiHODE; (5S,8R,9Z,12Z)-5,8-Dihydroxyoctadeca-9,12-dienoate	Lipids	Free fatty acids	-	2	614990	483640	1899400	999343	308970	668670	125630	367757	1009900	1024700	1048300	1.02763e+06	C20186	ko00591
pmf0397	Arachidic acid	Lipids	Free fatty acids	506-30-9	3	220120000	195750000	222340000	2.12737e+08	67844000	58470000	66742000	64352000	67980000	55789000	55172000	59647000	C06425	ko01040
Lmyn002403	Mandelic acid-β-glucoside	Phenolic acids	Phenolic acids	-	2	91149	142320	150370	127946	159030	130070	92878	127326	165670	129750	133620	143013	--	--
Lmmn002179	Methyl salicylate-2-O-glucoside	Phenolic acids	Phenolic acids	10019-60-0	2	103580	219300	457920	260267	283240	157820	130380	190480	183140	255500	252870	230503	--	--
Cmzp002057	6-O-Acetylarbutin	Phenolic acids	Phenolic acids	10338-88-2	3	396060	708790	824960	643270	763160	518220	335100	538827	670450	551460	584680	602197	--	--
Lmbn005487	12,13-DHOME; (9Z)-12,13-Dihydroxyoctadec-9-enoic acid	Lipids	Free fatty acids	263399-35-5	3	363760	618530	316000	432763	285140	359850	233180	292723	363020	404170	418770	395320	C14829	ko00591
MWSmce539	Dibutyl sebacate	Lipids	Free fatty acids	109-43-3	3	137510	121050	136280	131613	108080	96631	113670	106127	137440	140440	110470	129450	--	--
pmn001367	Protocatechuic acid-4-O-glucoside	Phenolic acids	Phenolic acids	-	1	35437000	76867000	61963000	58089000	19230000	73569000	20629000	3.78093e+07	44186000	45830000	44543000	44853000	--	--
pmb2871	1-O-Gentisoyl-β-D-glucoside	Phenolic acids	Phenolic acids	23445-11-6	2	35137000	71378000	58367000	5.49607e+07	23736000	72302000	22666000	39568000	38138000	52154000	45690000	4.53273e+07	--	--
pmn001553	Cimidahurinine	Phenolic acids	Phenolic acids	142542-89-0	1	5375700	7463600	6739100	6.52613e+06	12060000	4354700	2669800	6361500	6163400	6444300	6323800	6310500	--	--
pmn001411	Cornoside	Phenolic acids	Phenolic acids	40661-45-8	3	448030	1004200	458500	636910	161930	1116800	120880	466537	507670	529330	551590	529530	--	--
Jmwn002172	3,4-dihydroxyphenylethanol-β-D-glucopyranoside	Phenolic acids	Phenolic acids	-	2	1359800	3085800	2236700	2.22743e+06	614040	3186200	703740	1.50133e+06	1589400	1711800	1919900	1.74037e+06	--	--
Hmtn001120	5-(2-Hydroxyethyl)-2-O-glucosylphenol	Phenolic acids	Phenolic acids	-	1	3535800	4691400	4664600	4.29727e+06	7511600	2798200	1873600	4.06113e+06	4147000	4305300	4440100	4.29747e+06	--	--
Zmtn001661	Vanilloloside	Phenolic acids	Phenolic acids	74950-96-2	2	40234000	74444000	65171000	5.99497e+07	20239000	73022000	21702000	38321000	43654000	45044000	47559000	45419000	--	--
pmb2221	4-Hydroxysphinganine	Lipids	Sphingolipids	554-62-1	1	2806900	1544900	2375600	2.24247e+06	1793600	1370100	2383200	1.84897e+06	3041400	2999400	2966900	3.00257e+06	C12144	ko00600,ko01100
MWSmce285	Agarotetrol	Others	Saccharides and Alcohols	69809-22-9	3	102150	189870	432470	241497	129580	113870	74451	105967	198410	206770	205390	203523	--	--
pmb3075	3-O-p-Coumaroylshikimic acid	Phenolic acids	Phenolic acids	-	3	607860	477380	399140	494793	514820	691060	693530	633137	442580	488150	441770	457500	--	--
pmb0751	Trans-5-O-(p-Coumaroyl)shikimate	Phenolic acids	Phenolic acids	-	3	147590	149210	91359	129386	57090	161960	83899	100983	133620	140680	114420	129573	C02947	ko00940,ko00941,ko00945,ko01100,ko01110
mws0582	S-(Methyl)glutathione	Amino acids and derivatives	Amino acids and derivatives	2922-56-7	3	1176800	795760	1011300	994620	1169100	1393600	1091700	1.21813e+06	1072100	1130300	1062100	1.08817e+06	C11347	--
pme3174	Cytidine 5'-monophosphate(Cytidylic acid)	Nucleotides and derivatives	Nucleotides and derivatives	63-37-6	3	839410	733100	778360	783623	886480	913080	903690	901083	964830	773510	904830	881057	C00055	ko00240,ko01100
pme2074	Jasmonoyl-L-Isoleucine	Amino acids and derivatives	Amino acids and derivatives	120330-93-0	3	2965100	965200	1345800	1758700	898320	3673000	917460	1.82959e+06	2238900	2162300	2131500	2.17757e+06	C18699	ko04075
pme3188	Uridine 5'-monophosphate	Nucleotides and derivatives	Nucleotides and derivatives	58-97-9	1	2641400	2651100	2463400	2585300	2134900	3311100	2458300	2.63477e+06	2094800	2677500	2202200	2.32483e+06	C00105	ko00240,ko01100,ko01240
Hmqp006023	Ethyl 9-Hydroxy-10,12-octadecadienoic acid	Lipids	Free fatty acids	-	3	353400	242020	71619	222346	20073	95230	55241	56848	151630	152270	156720	153540	--	--
pmn001419	1-O-p-Coumaroyl-β-D-glucose*	Phenolic acids	Phenolic acids	7139-64-2	2	246140	617260	6815600	2.55967e+06	2431300	2727500	215920	1.79157e+06	1690500	1753700	2052700	1832300	C16827	--
Zmhn002301	p-Coumaric acid-4-O-glucoside*	Phenolic acids	Phenolic acids	117405-48-8	2	89763	296480	2765400	1.05055e+06	1212800	1190400	134300	845833	1008800	852530	903480	921603	C06739	--
Lmqn000351	Rutinose	Others	Saccharides and Alcohols	90-74-4	3	129300	119010	147260	131857	166210	216070	177360	186547	162360	116450	132590	137133	C08247	--
Lmsn000363	Raspberryketone glucoside	Phenolic acids	Phenolic acids	38963-94-9	3	913380	221850	233290	456173	564990	469140	461760	498630	512300	401650	624990	512980	--	--
Lmtn002233	Androsin	Phenolic acids	Phenolic acids	531-28-2	2	2085800	1686000	2135300	1.96903e+06	1785500	2039500	3223500	2349500	1764500	2030000	2153700	1.98273e+06	--	--
Hmsn002272	Demethyl coniferin	Phenolic acids	Phenolic acids	-	2	185740	118570	90038	131449	242570	133660	243010	206413	148850	142350	172340	154513	--	--
pmn001690	3-Hydroxy-4-isopropylbenzylalcohol-3-O-glucoside	Phenolic acids	Phenolic acids	-	3	91493	116160	111390	106348	140690	157870	104630	134397	119270	133520	114760	122517	--	--
pmn001691	9,12,13-Trihydroxy-10,15-octadecadienoic acid	Lipids	Free fatty acids	-	1	2203000	1497800	1377100	1.69263e+06	1331100	1552900	1365100	1.41637e+06	1693500	1656600	1699800	1683300	--	--
mws0884	Cyclic 3',5'-Adenylic acid	Nucleotides and derivatives	Nucleotides and derivatives	60-92-4	1	14002000	4717600	12700000	10473200	10786000	16385000	6531600	11234200	9671600	10250000	10070000	9997200	C00575	ko00230,ko01100
Lmtn002565	1-O-Vanilloyl-D-Glucose	Phenolic acids	Phenolic acids	-	3	78410	80512	176860	111927	479940	424420	618700	507687	297220	297980	281760	292320	C20470	--
Hmqn003054	9,10,11-Trihydroxy-12-octadecenoic acid	Lipids	Free fatty acids	61911-67-9	1	183890	215140	214820	204617	91835	169970	84685	115497	209250	205950	220620	211940	--	--
pmn001694	9,10,13-Trihydroxy-11-Octadecenoic Acid	Lipids	Free fatty acids	29907-57-1	2	2756100	3116300	3346400	3.07293e+06	1508300	2633500	1340900	1.82757e+06	3147200	3120800	3206600	3158200	C14835	ko00591
Lmbn004240	9,10-Dihydroxy-12,13-epoxyoctadecanoic acid	Lipids	Free fatty acids	-	1	5955.2	15261	35262	18826.1	1121.7	8164.4	4267.5	4517.87	15188	19617	23947	19584	C14837	ko00591
pmp001284	Monopalmitin	Lipids	Glycerol ester	542-44-9	1	54434	40033	55614	50027	43343	52394	72807	56181.3	42062	58205	70876	57047.7	--	--
pme3184	2'-Deoxyadenosine-5'-monophosphate	Nucleotides and derivatives	Nucleotides and derivatives	653-63-4	2	3539800	4190200	6184800	4.63827e+06	17627000	12620000	12688000	1.43117e+07	7874500	7847500	8232100	7984700	C00360	ko00230,ko01100
pmb0789	Pyridoxine-5'-O-glucoside	Others	Vitamin	-	3	9622600	11853000	16138000	1.25379e+07	47611000	36582000	35837000	40010000	22700000	23816000	21597000	2.27043e+07	C03996	--
pmc0066	2'-Deoxyinosine-5'-monophosphate	Nucleotides and derivatives	Nucleotides and derivatives	3393-18-8	3	14963000	6506100	5934300	9.13447e+06	15695000	17538000	18813000	1.73487e+07	12830000	13089000	13982000	1.33003e+07	C06196	ko00230
pmn001518	1-O-Galloyl-β-D-glucose	Phenolic acids	Phenolic acids	58511-73-2	2	18993000	43668000	33255000	31972000	17221000	54791000	16713000	29575000	24634000	28100000	28855000	2.71963e+07	C01158	--
pmb2928	Gallic acid-4-O-glucoside	Phenolic acids	Phenolic acids	84274-52-2	3	32678000	72497000	61886000	55687000	21673000	94561000	21711000	4.59817e+07	45259000	46777000	48659000	4.68983e+07	--	--
Smcn000644	Leonuriside A	Phenolic acids	Phenolic acids	121748-12-7	3	161050	317970	232160	237060	173430	145790	161980	160400	170160	164030	175890	170027	--	--
mws0675	β-Nicotinamide mononucleotide	Nucleotides and derivatives	Nucleotides and derivatives	1094-61-7	2	2350300	2110900	2623300	2361500	2557200	3005100	2014400	2.52557e+06	2635200	2624400	2616800	2.62547e+06	C00455	ko00760,ko01100
Lmqn000432	1-(sn-Glycero-3-phospho)-1D-myo-inositol	Others	Saccharides and Alcohols	-	2	43643000	36593000	46256000	42164000	19670000	39454000	30314000	2.98127e+07	35034000	38183000	41351000	3.81893e+07	--	--
Zmhn005413	p-Dimeric galloyl methyl ester	Phenolic acids	Phenolic acids	-	3	629610	586850	485040	567167	378090	410500	349490	379360	687820	541070	428930	552607	--	--
Hmln002806	5-O-Caffeoylshikimic acid	Phenolic acids	Phenolic acids	180981-12-8	2	2852300	9	620420	1.15758e+06	2254800	1616000	2689300	2186700	1534700	1768200	1745900	1.68293e+06	C10434	ko00940,ko00941,ko00945,ko01100,ko01110
pma6460	4-O-p-Coumaroylquinic acid	Phenolic acids	Phenolic acids	32451-86-8	3	357080	382570	291460	343703	351620	325540	387080	354747	309710	343920	379070	344233	C10441	--
pmn001421	3-O-p-Coumaroylquinic acid	Phenolic acids	Phenolic acids	87099-71-6	1	45004000	49544000	37626000	44058000	30864000	36550000	32299000	3.32377e+07	38675000	37895000	38897000	38489000	--	--
MWS2673	5,6-DiHETrE [(±)5,6-dihydroxy-8Z,11Z,14Z-eicosatrienoic acid]	Lipids	Free fatty acids	213382-49-1	2	1599200	1827500	1893800	1773500	1312400	1283500	1345000	1.31363e+06	1470900	1532000	1423800	1.47557e+06	C14772	ko00590,ko01100
pme3311	D-Fructose-1,6-biphosphate	Others	Saccharides and Alcohols	488-69-7	3	681650	283270	257710	407543	418090	429750	521760	456533	350400	313350	386870	350207	C00354	ko00400,ko00710,ko01100,ko01110,ko01200
pma0149	Sinapoyl malate	Phenolic acids	Phenolic acids	92344-58-6	3	403610	578950	910720	631093	426890	351980	140110	306327	473790	473430	439710	462310	C02887	ko00940
Jmwn002620	Vanillic Acid-4-O-Glucuronide	Phenolic acids	Phenolic acids	-	1	12145000	10049000	22558000	1.49173e+07	46571000	10706000	19034000	25437000	18504000	20071000	21258000	1.99443e+07	--	--
Lmsn002548	1-O-Caffeoyl-β-D-glucose	Phenolic acids	Phenolic acids	14364-08-0	1	13172000	10136000	22579000	1.52957e+07	43432000	10455000	19228000	2.43717e+07	19083000	19557000	19979000	1.95397e+07	C10433	--
Zmhn001793	6-O-Caffeoyl-D-glucose	Phenolic acids	Phenolic acids	-	1	8435200	10562000	16909000	1.19687e+07	13797000	12492000	6736800	11008600	9458100	10583000	9852300	9.96447e+06	--	--
mws0264	D-Trehalose	Others	Saccharides and Alcohols	99-20-7	1	9828800	6463500	7614800	7.96903e+06	14219000	14260000	16623000	15034000	9472600	10627000	9792700	9964100	C01083	ko00500,ko01100,ko01110,ko02010
MWSmce203	D-Cellobiose	Others	Saccharides and Alcohols	528-50-7	3	247960	224600	235040	235867	384300	320150	390800	365083	255860	259330	263120	259437	--	--
mws5038	Isomaltulose	Others	Saccharides and Alcohols	13718-94-0	1	20416000	14835000	14052000	1.64343e+07	29241000	25054000	31592000	28629000	20190000	22920000	20962000	2.13573e+07	C01742	--
mws1080	Galactinol	Others	Saccharides and Alcohols	3687-64-7	1	23209000	17273000	17751000	19411000	34189000	32391000	37950000	3.48433e+07	22828000	24591000	24632000	24017000	C01235	ko00052,ko01100
mws1333	Melibiose	Others	Saccharides and Alcohols	585-99-9	1	6365900	4216800	4681800	5.08817e+06	8744400	8961600	9340700	9.01557e+06	5930000	5782800	5908000	5873600	C05402	ko00052,ko01100,ko02010
pme0519	D-Sucrose	Others	Saccharides and Alcohols	57-50-1	1	10537000	8376900	10279000	9.73097e+06	15168000	16595000	19458000	1.70737e+07	10394000	10529000	12653000	11192000	C00089	ko00052,ko00500,ko01100,ko01110,ko02010
MA10039641	Lactobiose	Others	Saccharides and Alcohols	63-42-3	1	22247000	15283000	15722000	1.77507e+07	30845000	31318000	33819000	31994000	18953000	21389000	21112000	2.04847e+07	C00243	ko00052,ko01100,ko02010
Lmsn000381	D-Maltose	Others	Saccharides and Alcohols	69-79-4	1	19275000	16077000	16175000	1.71757e+07	33047000	25573000	30654000	29758000	20652000	21146000	20428000	20742000	C01971	--
mws0906	Coniferin	Phenolic acids	Phenolic acids	531-29-3	2	8399300	11803000	20690000	1.36308e+07	15530000	13513000	7534500	12192500	10516000	10814000	10484000	1.06047e+07	C00761	ko00940
Lmmn000774	Dihydrocaffeoylglucose	Phenolic acids	Phenolic acids	-	3	1098100	1005000	1066900	1.05667e+06	837780	617500	1005200	820160	958150	957200	1018900	978083	--	--
Zmln000899	Syringaldehyde-4-O-glucoside	Phenolic acids	Phenolic acids	-	2	1080400	945810	1109900	1045370	864430	541270	924510	776737	963350	969740	1032200	988430	--	--
MWS1983	Maltitol	Others	Saccharides and Alcohols	585-88-6	3	532920	416500	401180	450200	678660	760970	749360	729663	478000	457810	493680	476497	--	--
mws0609	Guanosine 3',5'-cyclic monophosphate	Nucleotides and derivatives	Nucleotides and derivatives	7665-99-8	1	6029800	2174700	5881400	4695300	4101300	6599500	2855300	4518700	3747400	4242900	4331800	4.10737e+06	C00942	ko00230,ko01100
pmb0801	4-Pyridoxic acid-O-glucoside	Others	Vitamin	-	3	150770	418220	602290	390427	914660	394780	130480	479973	387120	408630	379240	391663	--	--
pmb0981	Adenosine 5'-monophosphate	Nucleotides and derivatives	Nucleotides and derivatives	61-19-8	3	118020000	80447000	91561000	96676000	165550000	138510000	155910000	1.53323e+08	107630000	106440000	113380000	109150000	C00020	ko00230,ko00908,ko01100,ko01110,ko01240
mws0874	3'-Adenylic Acid	Nucleotides and derivatives	Nucleotides and derivatives	84-21-9	2	271410	141770	240670	217950	254800	276280	263530	264870	215650	192300	236830	214927	C01367	ko00230,ko01100
pmb0532	Inosine 5'-monophosphate	Nucleotides and derivatives	Nucleotides and derivatives	131-99-7	3	9270800	5787300	6767800	7275300	13636000	10600000	14470000	12902000	8140300	8795800	8223600	8.38657e+06	C00130	ko00230,ko01100,ko01110,ko01240
pmb1562	1-Stearidonoyl-Glycerol	Lipids	Glycerol ester	-	1	10955000	12330000	13830000	1.23717e+07	9007000	7650200	10787000	9.14807e+06	10520000	10768000	10387000	1.05583e+07	--	--
Lmhp011388	2-α-Linolenoyl-glycerol	Lipids	Glycerol ester	55268-58-1	1	39988000	72025000	56863000	56292000	37337000	47604000	54576000	4.65057e+07	46521000	59263000	57359000	54381000	--	--
Lmhp011562	1-α-Linolenoyl-glycerol	Lipids	Glycerol ester	-	1	187010000	157950000	177660000	1.74207e+08	118330000	137570000	185450000	1.47117e+08	160700000	157650000	168120000	1.62157e+08	--	--
pme1816	Neochlorogenic acid (5-O-Caffeoylquinic acid)	Phenolic acids	Phenolic acids	906-33-2	1	234760000	158370000	230930000	208020000	297630000	231540000	291780000	273650000	233180000	244000000	247210000	2.41463e+08	C17147	--
mws0178	Chlorogenic acid (3-O-Caffeoylquinic acid)	Phenolic acids	Phenolic acids	327-97-9	1	603760000	558240000	581740000	5.81247e+08	626190000	503260000	745810000	6.25087e+08	599060000	613890000	627190000	613380000	C00852	ko00940,ko00941,ko00945,ko01110
mws2108	Cryptochlorogenic acid (4-O-Caffeoylquinic acid)	Phenolic acids	Phenolic acids	905-99-7	2	530010000	504970000	531000000	5.21993e+08	649040000	572110000	709590000	643580000	574370000	601730000	578240000	584780000	--	--
mws0748	1-Caffeoylquinic acid	Phenolic acids	Phenolic acids	1241-87-8	2	217150000	143260000	217150000	192520000	289620000	221720000	279220000	263520000	221590000	218040000	223870000	2.21167e+08	--	--
Lmhp112042	1-Linoleoylglycerol*	Lipids	Glycerol ester	2277-28-3	1	85825	95139	73547	84837	207840	216330	238520	220897	172270	146400	67950	128873	--	--
Lmhp012042	2-Linoleoylglycerol*	Lipids	Glycerol ester	3443-82-1	1	84145	91088	80115	85116	192710	198410	164300	185140	139410	115950	102130	119163	--	--
Hmmn002544	Ferulic acid-4-O-glucoside	Phenolic acids	Phenolic acids	117405-51-3	2	5132300	2897300	5250000	4.42653e+06	7630900	5105500	7919900	6.88543e+06	4983000	5547200	5409500	5.31323e+06	--	--
Zmhn002334	6-O-Feruloyl-D-glucose	Phenolic acids	Phenolic acids	137887-25-3	3	55857	127470	513220	232182	210690	186940	101190	166273	184600	197940	194550	192363	--	--
Lmsn003318	1-O-Feruloyl-β-D-glucose	Phenolic acids	Phenolic acids	7196-71-6	3	2916500	2515500	3032200	2821400	6617700	5092800	8316500	6.67567e+06	4030500	4236200	4945500	4.40407e+06	C17759	--
pmb0296	1-Oleoyl-Sn-Glycerol	Lipids	Glycerol ester	129784-87-8	1	6407800	6503000	4173600	5694800	3611700	3101600	4105700	3.60633e+06	4136300	4895900	4581600	4.53793e+06	--	--
Zmhn003082	5-O-Galloyl-methyl quinine ester	Phenolic acids	Phenolic acids	-	3	2016600	1403500	1433000	1617700	2137900	1835700	2028800	2000800	1576100	1744600	1823600	1.71477e+06	--	--
Jmbn004420	Rosmarinic acid	Phenolic acids	Phenolic acids	537-15-5	3	415780	554630	731470	567293	461450	428250	342550	410750	438150	430870	437770	435597	C01850	ko00350,ko01100
pmb3107	Glucosyringic Acid	Phenolic acids	Phenolic acids	-	3	209770	1039000	937130	728633	1102800	638510	242980	661430	675760	757490	731660	721637	--	--
pmb0998	Guanosine 5'-monophosphate	Nucleotides and derivatives	Nucleotides and derivatives	85-32-5	3	1746100	985310	1024100	1.25184e+06	1761500	1336500	1689400	1595800	974810	1315900	1270900	1.1872e+06	C00144	ko00230,ko01100
pmb0964	Isopentenyladenine-7-N-glucoside	Nucleotides and derivatives	Nucleotides and derivatives	-	3	1959400	2766300	3945100	2.89027e+06	6443400	3221700	1902300	3855800	3225800	3228500	3463700	3306000	--	--
mws0179	Chlorogenic acid methyl ester	Phenolic acids	Phenolic acids	29708-87-0	2	1258100	3018700	17501000	7.25927e+06	9249400	3983700	1046800	4.75997e+06	5642300	5762200	5635100	5.67987e+06	--	--
pmb0752	3-O-Feruloylquinic acid	Phenolic acids	Phenolic acids	1899-29-2	2	92590	156070	244130	164263	160270	179650	162840	167587	179380	156990	145100	160490	C02572	--
Lmgn003073	5-O-Feruloylquinic acid	Phenolic acids	Phenolic acids	-	1	193180	124070	193670	170307	231930	166560	798850	399113	383270	205570	226090	271643	--	--
pma3724	1-O-Feruloylquinic acid	Phenolic acids	Phenolic acids	-	3	25461000	20685000	20545000	2.22303e+07	23916000	29699000	43750000	32455000	28628000	25566000	18703000	24299000	--	--
Lmbp002309	Sinapaldehyde-4-O-Glucoside	Phenolic acids	Phenolic acids	154461-65-1	2	545030	804290	885480	744933	427190	548430	187030	387550	569490	624080	590790	594787	--	--
pmn001695	Trihydroxycinnamoylquinic acid	Phenolic acids	Phenolic acids	-	1	58585000	65102000	57826000	6.05043e+07	34217000	84339000	39012000	5.25227e+07	52669000	55577000	59049000	55765000	--	--
mws0011	Syringin	Phenolic acids	Phenolic acids	118-34-3	3	2026000	1961800	1845200	1.94433e+06	2313900	1825700	3456900	2.53217e+06	1902900	2088300	1696700	1.89597e+06	C01533	ko00940
mws0232	Riboflavin (Vitamin B2)	Others	Vitamin	83-88-5	1	11708000	11902000	14235000	12615000	13415000	16701000	12759000	1.42917e+07	12100000	12963000	12197000	12420000	C00255	ko00740,ko01100,ko01110,ko01240,ko02010
pme3337	Succinyladenosine	Nucleotides and derivatives	Nucleotides and derivatives	4542-23-8	1	53816000	77888000	91260000	7.43213e+07	54471000	61327000	35341000	5.03797e+07	60673000	57884000	60176000	5.95777e+07	--	--
pme1286	S-(5'-Adenosy)-L-homocysteine	Amino acids and derivatives	Amino acids and derivatives	979-92-0	1	7008000	4274000	3359800	4880600	9332900	4586800	6507000	6808900	5203400	5291200	4953000	5149200	C00021	ko00270,ko01100,ko01230,ko01240
Zmhn002227	4-O-Glucosyl-sinapate	Phenolic acids	Phenolic acids	-	3	140540	182360	132200	151700	63715	169860	38547	90707.3	152770	128690	96318	125926	C02919	--
HJN003	1-O-Sinapoyl-D-glucose	Phenolic acids	Phenolic acids	-	3	224990	238960	198590	220847	173990	301560	375100	283550	247400	197470	215730	220200	C01175	ko00940
Lmzn001582	5'-Glucosyloxyjasmanic acid	Phenolic acids	Phenolic acids	-	2	136830000	89729000	82745000	1.03101e+08	94337000	118480000	129230000	1.14016e+08	104010000	107600000	100130000	1.03913e+08	--	--
MWStz103	S-(5'-Adenosyl)-L-methionine	Amino acids and derivatives	Amino acids and derivatives	29908-03-0	1	2842400	1922200	1440000	2068200	1894900	1616600	1061700	1524400	1214000	2097200	1324100	1545100	C00019	ko00261,ko00270,ko00330,ko00908,ko01100,ko01110,ko01230,ko01240,ko04122
pmc0281	Ribosyladenosine	Nucleotides and derivatives	Nucleotides and derivatives	-	3	2972900	2418700	3121300	2.83763e+06	3332800	2635700	1848200	2.60557e+06	2722200	2546100	2661800	2.64337e+06	--	--
mws1051	S-Adenosylmethionine	Amino acids and derivatives	Amino acids and derivatives	485-80-3	3	2263800	1444700	1076600	1.59503e+06	1886100	1457800	1649300	1664400	1648300	1336000	1613100	1.53247e+06	--	--
Hmln003529	Benzyl β-primeveroside	Phenolic acids	Phenolic acids	130622-31-0	1	1478000	1394400	601340	1.15791e+06	203510	1093300	435420	577410	901200	927430	961690	930107	--	--
Cmjn004337	Benzyl-(2''-O-xylosyl)glucoside	Phenolic acids	Phenolic acids	-	1	1424400	1906600	1673700	1.66823e+06	669310	2392300	1198900	1420170	1528900	1636800	1610700	1.59213e+06	--	--
pme3007	Uridine 5'-diphosphate	Nucleotides and derivatives	Nucleotides and derivatives	27821-45-0	3	482300	480470	330440	431070	435920	415030	466090	439013	399460	434410	407950	413940	C00015	ko00240,ko00908,ko01100,ko01240
Cmyp005062	Salireposide	Phenolic acids	Phenolic acids	16955-55-8	3	9	50196	396030	148745	7332400	3271800	846960	3.81705e+06	1841500	1830700	1797600	1.82327e+06	--	--
pmd0153	LysoPA 16:0	Lipids	Glycerol ester	22002-85-3	3	8134900	7056400	4830600	6.67397e+06	7052500	5590400	9904800	7515900	10634000	10257000	10791000	1.05607e+07	C04036	--
pmd0152	LysoPA 16:0 (2n isomer)	Lipids	Glycerol ester	-	3	9191500	8223000	7396200	8.27023e+06	6689800	7828900	9631300	8050000	10587000	10638000	10131000	10452000	--	--
pmb2165	LysoPC 10:0	Lipids	LPC	22248-63-1	3	81915	129130	146560	119202	96506	188500	75533	120180	89224	79404	144840	104489	--	--
Hmsn002948	2-Hydroxyphenol-1-O-glucosyl(6→1)rhamnoside	Phenolic acids	Phenolic acids	-	3	3733700	4495800	4094800	4108100	3742800	7515800	2637300	4.63197e+06	4088000	4456200	4474500	4.33957e+06	--	--
mws1089	Sucrose-6-phosphate	Others	Saccharides and Alcohols	-	3	600750	350050	558330	503043	488950	450240	456740	465310	557870	471970	521980	517273	--	--
Lmhp008337	LysoPE 14:0(2n isomer)	Lipids	LPE	-	3	306960	467280	403730	392657	156980	240890	215780	204550	233010	238340	246790	239380	--	--
pmb0864	LysoPE 14:0	Lipids	LPE	-	3	112980	85235	79257	92490.7	135830	112910	98853	115864	124550	135180	106090	121940	--	--
pme2117	Adenosine 5'-diphosphate	Nucleotides and derivatives	Nucleotides and derivatives	58-64-0	3	2063300	860040	686740	1203360	1905600	1944300	2714400	2188100	1045200	1440600	1514100	1333300	C00008	ko00190,ko00195,ko00230,ko00908,ko01100,ko01110,ko01240
Lman003972	6-O-Caffeoylarbutin	Phenolic acids	Phenolic acids	136172-60-6	2	9424900	7117300	5482200	7.34147e+06	8974700	4964300	11389000	8.44267e+06	7592600	7176200	7705900	7.49157e+06	--	--
Lmqn008975	PA(18:2/0:0)	Lipids	Glycerol ester	-	2	30097000	21527000	20050000	2.38913e+07	20917000	25285000	24259000	23487000	18552000	24136000	23586000	2.20913e+07	--	--
Lmhp008273	LysoPE 15:1(2n isomer)	Lipids	LPE	-	3	129630	212080	216100	185937	70424	132510	66077	89670.3	124290	120810	102900	116000	--	--
Lmhp008440	LysoPE 15:1	Lipids	LPE	-	3	100450	127050	206750	144750	57851	94777	43373	65333.7	100010	104720	95556	100095	--	--
pmb0862	LysoPC 12:0	Lipids	LPC	20559-18-6	3	282950	274370	228260	261860	175000	374510	88633	212714	205420	222960	185900	204760	--	--
Hmhn002787	(1'R,3R,5R,8'S)-Dihydrophaseic acid-O-β-D-glucoside	Phenolic acids	Phenolic acids	-	3	958120	3349500	5175900	3.16117e+06	1743500	3142600	2175900	2354000	2846000	2896000	2794000	2.84533e+06	--	--
Lmhp007836	LysoPE 16:3	Lipids	LPE	-	3	384750	223910	224430	277697	374690	466160	283700	374850	344050	328420	328490	333653	--	--
MWSmce674	Phylloquinone (Vitamin K1)	Others	Vitamin	84-80-0	3	307210	385130	421920	371420	461550	465150	317160	414620	359370	453280	393180	401943	--	--
Lmhp008763	LysoPE 16:1(2n isomer)	Lipids	LPE	-	1	13915000	13623000	13762000	1.37667e+07	13892000	17027000	12492000	1.44703e+07	13922000	14347000	13011000	13760000	--	--
Lmhp009034	LysoPE 16:1	Lipids	LPE	-	1	14966000	12569000	11697000	1.30773e+07	12721000	14371000	11780000	1.29573e+07	14900000	16363000	14398000	1.52203e+07	--	--
Lmqn005404	4-Hydroxybenzoyl-1-O-(6''-O-galloyl)glucoside	Phenolic acids	Phenolic acids	-	2	3232.3	41716	40065	28337.8	3034.5	71272	2221.3	25509.3	29858	29767	33341	30988.7	--	--
pmb0876	LysoPE 16:0	Lipids	LPE	53862-35-4	1	16062000	9633900	11022000	12239300	57742000	17111000	29333000	3.47287e+07	26859000	21549000	21428000	2.32787e+07	--	--
MWS5083	Flavin Single Nucleotide(FMN)	Nucleotides and derivatives	Nucleotides and derivatives	6184-17-4	2	24286000	16115000	17651000	1.93507e+07	27557000	31062000	30203000	2.96073e+07	19855000	22191000	20950000	2.09987e+07	C00061	ko00190,ko00740,ko01100,ko01110,ko01240
pmb0464	L-Aspartic acid-O-diglucoside	Amino acids and derivatives	Amino acids and derivatives	-	3	426040	149030	362210	312427	467880	257860	298890	341543	341060	297660	341440	326720	--	--
Lmhn002683	p-Coumaroylcaffeoyltartaric acid	Phenolic acids	Phenolic acids	-	3	286320	567890	449650	434620	503310	336540	159920	333257	427200	410600	470970	436257	--	--
mad2085	Caffeoyl-p-coumaroyltartaric acid	Phenolic acids	Phenolic acids	-	2	1034000	1210700	815780	1020160	992040	611480	794710	799410	841980	801170	808410	817187	--	--
pmb2654	Anthranilate-1-O-Sophoroside	Phenolic acids	Phenolic acids	-	3	401010	67392	91173	186525	862570	208400	469730	513567	195360	160410	240760	198843	--	--
Lmhp009464	LysoPE 17:1(2n isomer)	Lipids	LPE	-	1	2026600	1742300	2223200	1.99737e+06	1650300	1544500	1620200	1605000	2066300	2016700	1936800	2006600	--	--
Lmhp009769	LysoPE 17:1	Lipids	LPE	-	1	2068400	1881700	2380800	2110300	1745700	1611700	1529400	1.62893e+06	1886800	1950400	1984500	1.94057e+06	--	--
Lmhp010162	LysoPE 17:0	Lipids	LPE	-	3	89498	86479	147380	107786	112280	89600	107600	103160	111930	95563	96083	101192	--	--
pmd0130	LysoPC 14:0	Lipids	LPC	20559-16-4	1	41896000	47383000	41792000	4.36903e+07	22262000	29288000	21712000	2.44207e+07	30161000	29553000	29784000	2.98327e+07	--	--
Zmhn002508	4-p-Cumaroyl-rhamnosyl-(1→6)-D-glucose	Phenolic acids	Phenolic acids	-	2	2090200	2603800	3685700	2.79323e+06	4474700	2773300	3443800	3.56393e+06	2880000	3195900	3304900	3.12693e+06	--	--
Lmhp008233	LysoPE 18:4	Lipids	LPE	-	1	24562000	14543000	10852000	1.66523e+07	16084000	12581000	16576000	1.50803e+07	16753000	16635000	15392000	16260000	--	--
MWSmce621	Chicoric Acid	Phenolic acids	Phenolic acids	70831-56-0	3	588600	745350	404520	579490	381320	670570	499730	517207	511480	484660	527400	507847	C10437	--
Lmhp008801	LysoPE 18:3	Lipids	LPE	-	1	277500000	284020000	257840000	273120000	251000000	261250000	258720000	256990000	270790000	261340000	264270000	2.65467e+08	--	--
Lmhp008589	LysoPE 18:3(2n isomer)	Lipids	LPE	-	1	256430000	270370000	288080000	2.71627e+08	250180000	261190000	256790000	2.56053e+08	257330000	254860000	247690000	2.53293e+08	--	--
pmb0881	LysoPE 18:2	Lipids	LPE	-	1	249560000	254560000	238510000	2.47543e+08	200480000	202760000	194550000	1.99263e+08	228570000	207950000	214080000	2.16867e+08	--	--
pmb0874	LysoPE 18:2(2n isomer)	Lipids	LPE	-	1	239890000	201840000	232070000	224600000	214090000	212720000	214490000	2.13767e+08	241530000	203180000	208840000	217850000	--	--
pmb0856	LysoPE 18:1(2n isomer)	Lipids	LPE	-	3	73028000	53471000	50049000	5.88493e+07	61438000	62849000	64942000	6.30763e+07	53752000	58640000	61966000	5.81193e+07	--	--
mws0289	LysoPE 18:1	Lipids	LPE	89576-29-4	3	103170000	76783000	67846000	8.25997e+07	82147000	75798000	71772000	7.65723e+07	84211000	81185000	70647000	78681000	--	--
pmb2260	LysoPC 15:1	Lipids	LPC	-	2	2495400	3625100	3911300	3.34393e+06	678970	1309100	415560	801210	1779700	1817600	1790400	1795900	--	--
pmb0880	LysoPE 18:0(2n isomer)	Lipids	LPE	-	3	1409200	1185400	903070	1165890	990080	915410	1077900	994463	1246800	1174300	1267200	1.22943e+06	--	--
Lmhp009129	LysoPC 15:0(2n isomer)	Lipids	LPC	-	1	21060000	21487000	20394000	2.09803e+07	10546000	11382000	10491000	1.08063e+07	14360000	14932000	14490000	14594000	--	--
pmb0883	LysoPE 18:0	Lipids	LPE	69747-55-3	3	356540	204300	332620	297820	1455800	429790	950780	945457	623850	666760	811450	700687	--	--
pmb2319	LysoPC 15:0	Lipids	LPC	108273-89-8	1	14403000	15013000	14243000	14553000	7258700	7846200	7379400	7.49477e+06	10006000	10341000	9990500	10112500	--	--
pmb3066	5-O-p-Coumaroylshikimic acid O-glucoside	Phenolic acids	Phenolic acids	-	2	73514	149150	166740	129801	92793	126870	163900	127854	149510	143350	139300	144053	--	--
pmb3072	3-O-p-Coumaroylshikimic acid-O-glucoside	Phenolic acids	Phenolic acids	-	3	136540	116870	171080	141497	286020	287840	661130	411663	264340	243990	215040	241123	--	--
Hmyn007081	LysoPG 16:1	Lipids	Glycerol ester	-	1	52984000	29387000	38188000	4.01863e+07	225730000	219760000	233030000	2.26173e+08	157210000	149200000	163790000	1.56733e+08	--	--
Hmyn007168	LysoPG 16:0	Lipids	Glycerol ester	-	1	1070100000	878700000	1082900000	1.01057e+09	1091400000	1069300000	1006000000	1.05557e+09	1155800000	1124400000	1037200000	1105800000	--	--
pmb0758	Anisic acid-O-feruloyl glucoside	Phenolic acids	Phenolic acids	-	3	142820	165000	160920	156247	110300	143980	165660	139980	167660	156780	161700	162047	--	--
pmb0863	LysoPC 16:2(2n isomer)	Lipids	LPC	-	1	35380000	20540000	20235000	25385000	50702000	50080000	44079000	48287000	32420000	32341000	32092000	3.22843e+07	--	--
pma1303	LysoPC 16:2	Lipids	LPC	-	1	36904000	20511000	19413000	2.56093e+07	51594000	50563000	45580000	4.92457e+07	33679000	34158000	32936000	33591000	--	--
pmb0790	Pyridoxine-5'-O-diglucoside	Others	Vitamin	-	2	42183	55056	130610	75949.7	236500	205610	110410	184173	124950	163190	142330	143490	--	--
pmp001270	LysoPC 16:1	Lipids	LPC	76790-27-7	1	181850000	114700000	124480000	1.40343e+08	218060000	216560000	199700000	211440000	182840000	178550000	167080000	1.76157e+08	--	--
Lmhp008833	LysoPC 16:1(2n isomer)	Lipids	LPC	-	1	222480000	317190000	293300000	2.77657e+08	181910000	231040000	216590000	2.09847e+08	234810000	220200000	221830000	2.25613e+08	--	--
pmb0855	LysoPC 16:0	Lipids	LPC	17364-16-8	1	382400000	275830000	264120000	307450000	390130000	356720000	372020000	3.72957e+08	352650000	360690000	358490000	3.57277e+08	--	--
pmd0132	LysoPC 16:0(2n isomer)	Lipids	LPC	-	1	431940000	428370000	428240000	4.29517e+08	412140000	415660000	411880000	4.13227e+08	427990000	421190000	417200000	4.22127e+08	--	--
Lmgp003989	Dicaffeoylshikimic acid	Phenolic acids	Phenolic acids	-	1	637320000	592980000	670530000	633610000	757190000	654960000	752080000	721410000	672210000	672330000	679950000	674830000	--	--
Lmhp008688	LysoPE 20:5	Lipids	LPE	-	2	267650	193000	212030	224227	216640	206920	210460	211340	240650	220130	208810	223197	--	--
Lmhp009349	LysoPE 20:4(2n isomer)	Lipids	LPE	-	3	233200	175800	185740	198247	217440	236080	247270	233597	238420	241830	215170	231807	--	--
Lmhp009497	LysoPE 20:4	Lipids	LPE	-	3	282150	209720	212530	234800	251320	263890	267640	260950	268330	272320	258850	266500	--	--
Lmhp010040	LysoPE 20:3	Lipids	LPE	-	1	6386300	4681800	6302800	5790300	8331800	9287300	7387500	8.33553e+06	8082500	6646600	6657900	7129000	--	--
Lmhp009802	LysoPE 20:3(2n isomer)	Lipids	LPE	-	1	5660300	4526800	6023900	5.40367e+06	8386500	9096200	8905800	8.79617e+06	7438800	6057200	6390400	6628800	--	--
Lmsn004970	3,6-Di-O-caffeoyl glucose*	Phenolic acids	Phenolic acids	-	1	189800	395670	987250	524240	457390	723180	492290	557620	580750	558920	537840	559170	--	--
Lmsn004322	1,6-Di-O-caffeoyl-β-D-glucose*	Phenolic acids	Phenolic acids	-	1	166420	425150	1193200	594923	664340	731530	541280	645717	581150	545290	506550	544330	--	--
Lmsn002288	1-O-Caffeoyl-(6-O-glucosyl)-β-D-glucose	Phenolic acids	Phenolic acids	-	1	390800	551530	1426400	789577	810170	901270	1120900	944113	673020	641630	867170	727273	--	--
pme2125	Raffinose	Others	Saccharides and Alcohols	512-69-6	3	182400	126350	1307700	538817	281050	436060	539230	418780	614040	398510	426630	479727	C00492	ko00052,ko01100,ko02010
MWS0442	Maltotriose	Others	Saccharides and Alcohols	1109-28-0	3	427670	548300	5253100	2.07636e+06	1701500	980810	735010	1.13911e+06	1204700	1498100	1426800	1.37653e+06	C01835	ko02010
mws1589	D-Panose	Others	Saccharides and Alcohols	33401-87-5	3	33215	26335	448110	169220	85425	103700	127480	105535	112550	112830	108950	111443	C00713	--
pme0500	D-Melezitose	Others	Saccharides and Alcohols	597-12-6	3	38956	19308	665480	241248	76867	111520	174480	120956	145330	152360	163550	153747	C08243	--
Lmhp008718	LysoPC 17:2	Lipids	LPC	-	1	37576000	32379000	39524000	36493000	45500000	42759000	45271000	44510000	40892000	40238000	40641000	4.05903e+07	--	--
Lmhp010514	LysoPE 20:2(2n isomer)	Lipids	LPE	-	1	16607000	9904800	11108000	1.25399e+07	21905000	19028000	22231000	2.10547e+07	17420000	15765000	16490000	1.65583e+07	--	--
Lmhp010757	LysoPE 20:2	Lipids	LPE	-	1	17281000	9885300	11063000	12743100	21757000	20302000	25075000	22378000	16993000	17676000	18866000	17845000	--	--
Lmhp009590	LysoPC 17:1	Lipids	LPC	-	1	18791000	16900000	17769000	17820000	19931000	18460000	18561000	18984000	19611000	18802000	19277000	19230000	--	--
Lmhp010515	LysoPC 17:0(2n isomer)	Lipids	LPC	-	1	6179900	6802100	9305200	7.42907e+06	3829200	4838700	4505700	4391200	5388600	5092000	4997600	5159400	--	--
Lmhp009526	2-α-Linolenoyl-glycerol-1-O-glucoside	Lipids	Glycerol ester	-	1	319060	282330	246870	282753	404060	560840	393910	452937	418690	351340	596380	455470	--	--
Hmqp006235	LysoPC 18:4	Lipids	LPC	-	1	131770000	75146000	62818000	8.99113e+07	105640000	81503000	117350000	1.01498e+08	91872000	96931000	90488000	93097000	--	--
Wmzn002116	3,5-Dicaffeoylquinic acid	Phenolic acids	Phenolic acids	-	1	636440	1172000	3080000	1629480	2918200	1736400	642080	1765560	1891300	1942000	1746200	1.85983e+06	--	--
MWSmce346	1,3-O-Dicaffeoylquinic Acid (Cynarin)	Phenolic acids	Phenolic acids	30964-13-7	1	82612000	53195000	48443000	6.14167e+07	94680000	61638000	86007000	80775000	67393000	65459000	58696000	6.38493e+07	C10445	--
Li512115	Isochlorogenic acid B	Phenolic acids	Phenolic acids	14534-61-3	1	1123000000	1120400000	1334200000	1.19253e+09	1366200000	1246500000	1320900000	1311200000	1292800000	1293300000	1336200000	1.30743e+09	C10468	--
pmn001384	Isochlorogenic acid C	Phenolic acids	Phenolic acids	57378-72-0	1	1039500000	1095000000	1318300000	1.15093e+09	1337100000	1237700000	1221900000	1.26557e+09	1286200000	1293500000	1278600000	1286100000	--	--
pmn001382	Isochlorogenic acid A	Phenolic acids	Phenolic acids	2450-53-5	1	1103500000	1103100000	1007600000	1071400000	1040200000	1047500000	1325900000	1.13787e+09	1017100000	1027900000	1078200000	1.04107e+09	--	--
pmb0865	LysoPC 18:3(2n isomer)	Lipids	LPC	-	1	92504000	100280000	96941000	96575000	105700000	106120000	112880000	1.08233e+08	105560000	108800000	117370000	1.10577e+08	--	--
pmb0854	LysoPC 18:3	Lipids	LPC	-	1	726550000	627020000	647220000	666930000	653500000	669750000	631450000	6.51567e+08	655630000	644120000	646080000	648610000	--	--
Hmbn002692	6'-O-Feruloyl-D-sucrose	Phenolic acids	Phenolic acids	118230-77-6	2	156240	283140	209380	216253	157820	301530	54609	171320	145470	143360	182470	157100	--	--
pmp001273	LysoPC 18:2	Lipids	LPC	-	1	555090000	369540000	272950000	3.99193e+08	571540000	531910000	583370000	5.62273e+08	383450000	533180000	516030000	4.77553e+08	--	--
pmp001251	LysoPC 18:2(2n isomer)	Lipids	LPC	-	1	137200000	160890000	158050000	1.52047e+08	176430000	173110000	158840000	169460000	176470000	175270000	150300000	1.67347e+08	--	--
pmp001281	LysoPC 18:1	Lipids	LPC	-	1	820250000	600740000	585070000	6.68687e+08	540660000	626240000	675980000	6.14293e+08	585930000	662460000	590380000	6.12923e+08	--	--
Lmhp010190	LysoPC 18:1(2n isomer)	Lipids	LPC	-	1	658450000	606230000	589360000	6.18013e+08	550230000	588990000	627250000	5.88823e+08	643790000	603990000	655050000	6.34277e+08	--	--
pmd0136	LysoPC 18:0(2n isomer)	Lipids	LPC	-	1	259940000	204100000	218890000	2.27643e+08	169690000	187920000	193740000	1.83783e+08	205760000	214960000	210300000	210340000	--	--
pmp001259	5,8,11,14-Pentadecanoamide	Lipids	Free fatty acids	-	3	612870	405190	634540	550867	415420	568420	291450	425097	555560	497320	537540	530140	--	--
Lmjp003731	3,4-O-Dicaffeoylquinic Acid Methyl Ester*	Phenolic acids	Phenolic acids	-	1	4691600	3415100	3454300	3.85367e+06	5791300	5704100	7833700	6.44303e+06	4265800	3626300	7725300	5205800	--	--
Lmjp003822	3,5-O-Dicaffeoylquinic Acid Methyl Ester*	Phenolic acids	Phenolic acids	159934-13-1	1	4579200	3701800	3684100	3.98837e+06	4974100	4651900	7294900	5640300	5525400	4513900	4879700	4973000	--	--
Zmcn005156	4,5-O-Dicaffeoylquinic Acid Methyl Ester	Phenolic acids	Phenolic acids	-	1	91217000	78591000	84986000	8.49313e+07	80728000	84318000	104590000	8.98787e+07	86046000	75628000	92459000	84711000	--	--
Lmhp008924	LysoPC 19:3	Lipids	LPC	-	1	429770	733970	3302400	1.48871e+06	1143600	838900	945800	976100	1155200	1155300	1139100	1.14987e+06	--	--
Lmhp007840	LysoPC 19:2	Lipids	LPC	-	2	18121000	15634000	12505000	15420000	11736000	9696700	11025000	1.08192e+07	10527000	10865000	10600000	10664000	--	--
Lmhp007598	LysoPC 19:2(2n isomer)	Lipids	LPC	-	2	25705000	23450000	19852000	2.30023e+07	15984000	20003000	18291000	1.80927e+07	17319000	17762000	18008000	1.76963e+07	--	--
Lmhp010908	LysoPC 19:1	Lipids	LPC	-	1	7701700	10003000	9487000	9063900	7291800	7352300	6210500	6.95153e+06	8439800	8472100	7933800	8281900	--	--
Zmfn000481	Uridine-5'-Diphosphate-D-Xylose	Nucleotides and derivatives	Nucleotides and derivatives	3616-06-6	1	4527800	3809700	3543800	3.96043e+06	3124100	4150400	3928300	3.73427e+06	3368500	4186800	3709700	3755000	C00190	ko00520,ko00908,ko01100
pmb2228	LysoPC 19:0	Lipids	LPC	108273-88-7	3	2639500	3584400	2143900	2.78927e+06	761970	1689200	830080	1093750	1540000	1542800	1505400	1529400	--	--
pmc0960	LysoPC 20:4	Lipids	LPC	-	3	229560	267150	262340	253017	367570	497390	136840	333933	299580	333450	328420	320483	--	--
Lmhp009890	LysoPC 20:3	Lipids	LPC	1199257-41-4	1	37484000	27272000	27847000	3.08677e+07	52817000	58709000	52546000	5.46907e+07	39966000	43041000	43564000	4.21903e+07	--	--
pmd0147	LysoPC 20:2*	Lipids	LPC	-	3	264580000	147260000	143840000	1.85227e+08	279980000	276620000	281700000	2.79433e+08	238090000	233530000	237940000	236520000	--	--
pmd0146	LysoPC 20:2(2n isomer)*	Lipids	LPC	-	3	374410000	333210000	356280000	3.54633e+08	312900000	356030000	347450000	3.38793e+08	342410000	328960000	330670000	3.34013e+08	--	--
Lmhp011549	LysoPC 20:1	Lipids	LPC	-	2	495480000	407990000	355740000	4.19737e+08	422700000	444670000	470720000	446030000	449210000	428120000	359320000	4.12217e+08	--	--
pmd0143	LysoPC 20:0	Lipids	LPC	108341-80-6	3	8488800	3572500	1543500	4.53493e+06	9008600	6582400	7933400	7.84147e+06	5952800	6633300	5640700	6075600	--	--
pmb2922	Uridine 5'-diphospho-D-glucose	Nucleotides and derivatives	Nucleotides and derivatives	133-89-1	1	35845000	21355000	20066000	2.57553e+07	18918000	24157000	20566000	2.12137e+07	21445000	25218000	21984000	2.28823e+07	C00029	ko00040,ko00052,ko00053,ko00240,ko00500,ko00520,ko00524,ko00561,ko00908,ko01100,ko01110,ko01240
Lmhp010394	LysoPC 22:4	Lipids	LPC	-	2	169860	222820	272110	221597	136290	243320	139690	173100	158670	177030	209020	181573	--	--
mws1409	Uridine-5'-diphosphoglucuronic acid	Nucleotides and derivatives	Nucleotides and derivatives	-	3	126600	79510	105880	103997	131900	84154	125830	113961	103990	103190	101570	102917	--	--
pmb2936	Disinapoyl glucoside	Phenolic acids	Phenolic acids	-	3	103140	119450	177170	133253	89028	97029	94475	93510.7	142650	125320	127350	131773	--	--
Hmyn006303	LysoPI 18:3	Lipids	Glycerol ester	-	3	185370000	147190000	181640000	171400000	99333000	159170000	126070000	128191000	138200000	128870000	76609000	1.1456e+08	--	--
Lmqn000780	Uridine 5'-diphospho-N-acetylglucosamine	Nucleotides and derivatives	Nucleotides and derivatives	528-04-1	1	1477900	1355400	1259100	1.36413e+06	900250	1320000	989030	1069760	1112700	1224400	1044100	1.12707e+06	C00043	ko00520,ko00524,ko01100
MWS0132	Oxiglutatione	Amino acids and derivatives	Amino acids and derivatives	27025-41-8	2	1887000	5189000	1348800	2.80827e+06	2170200	2103500	1330300	1868000	1963100	2083300	2018400	2021600	C00127	ko00480,ko01100,ko01240
Hmgp001944	Isoacteoside	Phenolic acids	Phenolic acids	61303-13-7	3	513780	345100	267110	375330	198000	184920	293380	225433	227990	229540	376650	278060	--	--
Hmgn002038	β-Oxoacteoside	Phenolic acids	Phenolic acids	-	3	85245	64684	201400	117110	105210	149460	147670	134113	116420	152820	110640	126627	--	--
Lmsn015919	Phytic acid	Organic acids	Organic acids	83-86-3	3	487180	538600	546960	524247	524180	478830	533180	512063	538440	531820	536950	535737	C01204	ko00562,ko01100,ko04070
pmb0530	Nicotinic acid adenine dinucleotide	Nucleotides and derivatives	Nucleotides and derivatives	53-84-9	1	12538000	12942000	12388000	1.26227e+07	12858000	18142000	12291000	1.44303e+07	12535000	11763000	14539000	1.29457e+07	C00003	ko00190,ko00730,ko00760,ko01100,ko01240
Lmhp008744	1-α-Linolenoyl-glycerol-2,3-di-O-glucoside*	Lipids	Glycerol ester	-	1	281020	288580	215260	261620	372410	600390	573160	515320	407730	416990	273450	366057	--	--
Lmhp008513	2-α-Linolenoyl-glycerol-1,3-di-O-glucoside*	Lipids	Glycerol ester	-	1	1169100	960480	1027600	1.05239e+06	1112500	788900	853900	918433	737170	687960	901050	775393	--	--
pmp001276	1-Linolenoyl-rac-glycerol-diglucoside	Lipids	Free fatty acids	-	1	228990000	217830000	192570000	213130000	309350000	289950000	287690000	2.95663e+08	275980000	269820000	266250000	2.70683e+08	--	--
HJN102	3,4,5-Tricaffeoylquinic acid	Phenolic acids	Phenolic acids	86632-03-3	2	6534300	10671000	13394000	1.01998e+07	18837000	11086000	8149800	1.26909e+07	10894000	9705300	8095900	9.56507e+06	--	--
Lmhp009190	2-Linoleoylglycerol-1,3-di-O-glucoside	Lipids	Glycerol ester	-	1	130450	106750	259490	165563	144030	151580	122310	139307	87905	94700	93976	92193.7	--	--
Lmgn002253	Syringoylcaffeoylquinic acid-D-glucose	Phenolic acids	Phenolic acids	-	1	30780	66418	175240	90812.7	105980	95308	65257	88848.3	183850	166810	62700	137787	--	--
Hmyp007396	PC(oxo-11:0/18:2)	Lipids	PC	-	2	225260	209620	149270	194717	1403200	529980	1344500	1092560	634920	662020	784940	693960	--	--
Lmgn004359	SinapoylcaffeoylQuinic acid O-glucose	Phenolic acids	Phenolic acids	-	2	2564600	6397400	8015500	5.65917e+06	5890300	8407000	3749500	6015600	5385600	5559100	5699700	5.54813e+06	--	--
pme2651	NADP (Nicotinamide adenine dinucleotide phosphate)	Nucleotides and derivatives	Nucleotides and derivatives	53-59-8	3	176100	144930	80781	133937	244560	176600	369310	263490	97242	137370	181070	138561	C00006	ko00195,ko00480,ko00760,ko01100,ko01240
pme2746	Riboflavin 5'-Adenosine Diphosphate	Nucleotides and derivatives	Nucleotides and derivatives	146-14-5	1	21369000	13891000	16192000	1.71507e+07	26795000	26396000	22407000	2.51993e+07	16859000	19947000	19363000	18723000	C00016	ko00740,ko01100,ko01110,ko01240

## Sheet: Table S3
Supplementary Table S3: Differentially accumulated metabolites detected in red (R) and blue (B) LED light treated leafy vegetable sweet potato (Fushu-18). All analyses were done in triplicates.
Index	Compounds	Class I	Class II	CAS	Level	R1	R2	R3	Average R	B1	B2	B3	Average B	VIP	p_value	FDR	Fold_Change	Log2FC	Type
mws0217	L-Glycine	Amino acids and derivatives	Amino acids and derivatives	56-40-6	3	122410	137820	185500	148577	52735	30929	42608	42090.7	1.58275	0.0215693	0.319922	0.283293	-1.81964	down
pme3193	N-Acetyl-L-glycine	Amino acids and derivatives	Amino acids and derivatives	543-24-8	3	181100	120020	158970	153363	60219	96142	33778	63379.7	1.41338	0.0239736	0.324297	0.413265	-1.27486	down
mws0216	Trans-4-Hydroxy-L-proline	Amino acids and derivatives	Amino acids and derivatives	51-35-4	2	118340000	59451000	89958000	8.92497e+07	32810000	49290000	39845000	4.06483e+07	1.48467	0.0943029	0.456224	0.455445	-1.13465	down
pme2679	L-Allo-isoleucine	Amino acids and derivatives	Amino acids and derivatives	1509-34-8	3	150120000	69919000	103150000	1.0773e+08	38940000	55982000	46828000	47250000	1.4784	0.115872	0.465966	0.438598	-1.18903	down
mws0001	L-Asparagine	Amino acids and derivatives	Amino acids and derivatives	70-47-3	1	33127000	63735000	98294000	65052000	11179000	18894000	16314000	1.54623e+07	1.49621	0.116904	0.465966	0.237692	-2.07284	down
pme0057	L-Homocysteine	Amino acids and derivatives	Amino acids and derivatives	6027-13-0	3	3361600	5340800	2657600	3.78667e+06	1058300	2247700	904130	1.40338e+06	1.43914	0.0777913	0.428717	0.37061	-1.43203	down
mws0254	L-Histidine	Amino acids and derivatives	Amino acids and derivatives	71-00-1	1	74289000	49911000	60751000	6.16503e+07	23429000	23428000	29762000	2.55397e+07	1.62854	0.0278781	0.329939	0.414266	-1.27137	down
Zmyn000155	N-α-Acetyl-L-ornithine	Amino acids and derivatives	Amino acids and derivatives	6205-08-9	3	1190700	1639800	5343900	2724800	739840	917810	989270	882307	1.15087	0.29628	0.614018	0.323806	-1.6268	down
pme0122	N6-Acetyl-L-lysine	Amino acids and derivatives	Amino acids and derivatives	692-04-6	3	855300	559220	799550	738023	355540	287870	451110	364840	1.49765	0.035429	0.33342	0.494348	-1.0164	down
pme3388	Homoarginine	Amino acids and derivatives	Amino acids and derivatives	156-86-5	2	1191500	1458400	2539600	1.72983e+06	565290	486300	593480	548357	1.52718	0.102316	0.456224	0.317	-1.65745	down
Zmjp000182	N-Monomethyl-L-arginine	Amino acids and derivatives	Amino acids and derivatives	17035-90-4	1	3880800	5666400	9933600	6493600	1928100	2018800	2190300	2.04573e+06	1.4806	0.131305	0.481235	0.315038	-1.6664	down
Zmdp000292	Arginine methyl ester	Amino acids and derivatives	Amino acids and derivatives	-	1	4138900	5373000	9399100	6.30367e+06	2386900	1889000	2133300	2136400	1.4801	0.118557	0.465966	0.338914	-1.56101	down
Zmzp000145	Trimethyllysine	Amino acids and derivatives	Amino acids and derivatives	23284-33-5	1	14026000	10162000	19707000	1.46317e+07	6744700	6489000	6585000	6.60623e+06	1.49256	0.101361	0.456224	0.451502	-1.14719	down
MWS5164	N,N'-Dimethylarginine;SDMA*	Amino acids and derivatives	Amino acids and derivatives	30344-00-4	2	1907800	2344500	4534600	2.92897e+06	1069500	1403900	1146700	1206700	1.38711	0.166332	0.507175	0.411988	-1.27932	down
NK10251888	NG,NG-Dimethyl-L-arginine*	Amino acids and derivatives	Amino acids and derivatives	30315-93-6	2	2148000	2424400	4704500	3092300	1190900	1638900	1092400	1307400	1.38568	0.153499	0.506529	0.422792	-1.24198	down
mws0282	L-Tryptophan	Amino acids and derivatives	Amino acids and derivatives	73-22-3	1	231340000	154600000	230240000	2.05393e+08	90708000	136930000	62648000	96762000	1.42122	0.0323815	0.330125	0.471106	-1.08588	down
Zmdp001647	γ-Glutamyl-L-valine	Amino acids and derivatives	Amino acids and derivatives	-	1	1718000	722370	1377400	1272590	689540	402100	412710	501450	1.36704	0.107311	0.456224	0.394039	-1.34359	down
Zmdp002216	L-γ-Glutamyl-L-leucine	Amino acids and derivatives	Amino acids and derivatives	2566-39-4	1	4592800	1586700	3139200	3.10623e+06	1174700	1086400	1062600	1107900	1.42081	0.147698	0.504071	0.35667	-1.48734	down
pme1712	L-Saccharopine	Amino acids and derivatives	Amino acids and derivatives	997-68-2	3	215300	263840	330060	269733	85230	95116	126970	102439	1.59245	0.0256432	0.32894	0.379778	-1.39677	down
Zmdp001663	γ-glutamylmethionine	Amino acids and derivatives	Amino acids and derivatives	17663-87-5	3	456250	132370	350460	313027	131410	123260	62042	105571	1.26689	0.155802	0.506529	0.337258	-1.56808	down
Zmdn001564	γ-Glutamylphenylalanine	Amino acids and derivatives	Amino acids and derivatives	7432-24-8	3	2559400	745510	715420	1340110	121470	549840	174950	282087	1.40151	0.221089	0.542778	0.210495	-2.24814	down
pmb2855	L-Glutamine-O-glycoside	Amino acids and derivatives	Amino acids and derivatives	-	3	222790	109850	268030	200223	82823	126210	50217	86416.7	1.25718	0.121267	0.465966	0.431601	-1.21223	down
Zmdp001857	γ-Glutamyltyrosine	Amino acids and derivatives	Amino acids and derivatives	7432-23-7	3	5327800	4264600	3443000	4.34513e+06	829320	2499900	505630	1.27828e+06	1.43497	0.0210265	0.319922	0.294187	-1.76519	down
mws0383	10-Heptadecenoic Acid	Lipids	Free fatty acids	29743-97-3	2	1386800	1476000	987400	1283400	336360	797040	327410	486937	1.49176	0.0210752	0.319922	0.379411	-1.39816	down
YC512117	Stearidonic acid	Lipids	Free fatty acids	20290-75-9	3	377430	115400	158600	217143	68077	108640	67300	81339	1.31835	0.233843	0.545737	0.374587	-1.41663	down
pmb1574	9,12-Octadecadien-6-Ynoic Acid	Lipids	Free fatty acids	61481-29-6	3	475280	1090900	588690	718290	355370	421120	291460	355983	1.29528	0.191739	0.530313	0.495598	-1.01276	down
mws2623	11-Octadecanoic acid(Vaccenic acid)	Lipids	Free fatty acids	506-17-2	3	26977000	28973000	17826000	24592000	8330100	13625000	9354100	10436400	1.56383	0.036627	0.33342	0.424382	-1.23656	down
Lmyn012331	Petroselinic acid	Lipids	Free fatty acids	593-39-5	1	24874000	26143000	17913000	2.29767e+07	7705200	13652000	9253700	1.02036e+07	1.56429	0.0187125	0.319922	0.444087	-1.17109	down
mws0396	Elaidic Acid	Lipids	Free fatty acids	112-79-8	1	76501000	80430000	53356000	7.00957e+07	22925000	45575000	27660000	3.20533e+07	1.5078	0.0267996	0.329939	0.45728	-1.12885	down
Zmyn004548	12-Oxo-phytodienoic acid	Lipids	Free fatty acids	85551-10-6	3	301490	344970	219190	288550	89186	205200	107880	134089	1.4437	0.0400335	0.342355	0.464698	-1.10563	down
Hmqn004825	Rabdosia acid A	Lipids	Free fatty acids	-	1	950930	1158600	436010	848513	204380	468700	328340	333807	1.36387	0.126841	0.47185	0.393402	-1.34592	down
pmb2786	9-Hydroxy-10,12,15-octadecatrienoic acid	Lipids	Free fatty acids	89886-42-0	1	699060	866380	338620	634687	182050	324920	237730	248233	1.42026	0.122958	0.465966	0.391112	-1.35435	down
pmb2787	9-Oxo-10E,12Z-octadecadienoic acid	Lipids	Free fatty acids	54232-59-6	3	931420	1096000	429460	818960	212120	469160	312690	331323	1.36727	0.122674	0.465966	0.404566	-1.30555	down
Lmbn005443	13-KODE; (9Z,11E)-13-Oxooctadeca-9,11-dienoic acid	Lipids	Free fatty acids	54739-30-9	1	671610	813130	337130	607290	174560	328510	223560	242210	1.42621	0.11145	0.463234	0.398837	-1.32613	down
Hmqp005455	15(R)-Hydroxylinoleic Acid	Lipids	Free fatty acids	177931-23-6	2	287170	859880	261670	469573	107090	287940	108820	167950	1.22217	0.258769	0.571289	0.357665	-1.48332	down
Hmqp005411	9-Oxo-12Z-Octadecenoic acid	Lipids	Free fatty acids	112543-32-5	2	294800	864530	241990	467107	88969	285690	66249	146969	1.2356	0.244774	0.553223	0.314638	-1.66824	down
pmb2799	12,13-Epoxy-9-Octadecenoic Acid	Lipids	Free fatty acids	6799-85-5	1	58408	60451	51145	56668	10710	29901	13685	18098.7	1.55325	0.011448	0.296241	0.319381	-1.64665	down
pmb2791	9-Hydroperoxy-10E,12,15Z-octadecatrienoic acid	Lipids	Free fatty acids	111004-08-1	3	377590	435340	381370	398100	145110	270040	165790	193647	1.54315	0.019218	0.319922	0.486427	-1.0397	down
MWS80007	13-Hydroperoxy-9Z,11E-octadecadienoic acid*	Lipids	Free fatty acids	23017-93-8	2	1060700	2350100	955900	1.45557e+06	356910	831680	396510	528367	1.37465	0.165123	0.507175	0.362997	-1.46197	down
Lmbn005287	7S,8S-DiHODE; (9Z,12Z)-(7S,8S)-Dihydroxyoctadeca-9,12-dienoic acid*	Lipids	Free fatty acids	143288-65-7	2	1058800	2431100	941090	1.477e+06	365540	861550	369430	532173	1.34856	0.17809	0.52098	0.360308	-1.4727	down
pmb2804	13S-Hydroperoxy-9Z,11E-octadecadienoic acid	Lipids	Free fatty acids	33964-75-9	3	189350	430850	495370	371857	96329	230400	71579	132769	1.28252	0.106897	0.456224	0.357044	-1.48582	down
pmn001689	9-Hydroxy-12-oxo-15(Z)-octadecenoic acid	Lipids	Free fatty acids	-	3	622550	461160	1844200	975970	305440	697390	111560	371463	1.01127	0.300159	0.618611	0.380609	-1.39362	down
Zmjn004133	9S-Hydroperoxy-10E,12Z-octadecadienoic acid	Lipids	Free fatty acids	5502-91-0	3	198370	496580	359470	351473	140940	199110	87488	142513	1.30212	0.123381	0.465966	0.405472	-1.30233	down
MWS80006	9-Hydroperoxy-9Z,11E-Octadecadienoic Acid	Lipids	Free fatty acids	-	2	412610	941190	437070	596957	151400	354140	159560	221700	1.3744	0.149675	0.506175	0.371384	-1.42902	down
Lmbn004685	5S,8R-DiHODE; (5S,8R,9Z,12Z)-5,8-Dihydroxyoctadeca-9,12-dienoate	Lipids	Free fatty acids	-	2	614990	483640	1899400	999343	308970	668670	125630	367757	1.03947	0.295404	0.614018	0.367998	-1.44223	down
pmf0397	Arachidic acid	Lipids	Free fatty acids	506-30-9	3	220120000	195750000	222340000	2.12737e+08	67844000	58470000	66742000	64352000	1.67927	0.00136335	0.126791	0.302496	-1.72501	down
Hmqp006023	Ethyl 9-Hydroxy-10,12-octadecadienoic acid	Lipids	Free fatty acids	-	3	353400	242020	71619	222346	20073	95230	55241	56848	1.29461	0.174276	0.520729	0.255673	-1.96763	down
Lmbn004240	9,10-Dihydroxy-12,13-epoxyoctadecanoic acid	Lipids	Free fatty acids	-	1	5955.2	15261	35262	18826.1	1121.7	8164.4	4267.5	4517.87	1.18258	0.236147	0.545737	0.239979	-2.05902	down
Lmhp112042	1-Linoleoylglycerol*	Lipids	Glycerol ester	2277-28-3	1	85825	95139	73547	84837	207840	216330	238520	220897	1.657	0.000503694	0.0749496	2.60378	1.38061	up
Lmhp012042	2-Linoleoylglycerol*	Lipids	Glycerol ester	3443-82-1	1	84145	91088	80115	85116	192710	198410	164300	185140	1.66774	0.00684624	0.272873	2.17515	1.12111	up
Lmhp008273	LysoPE 15:1(2n isomer)	Lipids	LPE	-	3	129630	212080	216100	185937	70424	132510	66077	89670.3	1.3708	0.0571707	0.409991	0.482263	-1.05211	down
Lmhp008440	LysoPE 15:1	Lipids	LPE	-	3	100450	127050	206750	144750	57851	94777	43373	65333.7	1.32363	0.114644	0.465966	0.451355	-1.14766	down
pmb0876	LysoPE 16:0	Lipids	LPE	53862-35-4	1	16062000	9633900	11022000	12239300	57742000	17111000	29333000	3.47287e+07	1.35889	0.20005	0.533468	2.83747	1.50461	up
pmb2260	LysoPC 15:1	Lipids	LPC	-	2	2495400	3625100	3911300	3.34393e+06	678970	1309100	415560	801210	1.532	0.0119452	0.296241	0.239601	-2.06129	down
pmb0883	LysoPE 18:0	Lipids	LPE	69747-55-3	3	356540	204300	332620	297820	1455800	429790	950780	945457	1.40447	0.157269	0.506529	3.17459	1.66657	up
Hmyn007081	LysoPG 16:1	Lipids	Glycerol ester	-	1	52984000	29387000	38188000	4.01863e+07	225730000	219760000	233030000	2.26173e+08	1.65618	0.000123701	0.0230084	5.62812	2.49265	up
pmb2228	LysoPC 19:0	Lipids	LPC	108273-88-7	3	2639500	3584400	2143900	2.78927e+06	761970	1689200	830080	1093750	1.49606	0.0357115	0.33342	0.392128	-1.3506	down
Hmyp007396	PC(oxo-11:0/18:2)	Lipids	PC	-	2	225260	209620	149270	194717	1403200	529980	1344500	1092560	1.58097	0.0850154	0.449828	5.61102	2.48826	up
pme0033	Hypoxanthine	Nucleotides and derivatives	Nucleotides and derivatives	68-94-0	3	2462000	2993900	1713500	2389800	1016500	1672400	842950	1.17728e+06	1.413	0.0619939	0.420951	0.492628	-1.02143	down
pme0256	Xanthine	Nucleotides and derivatives	Nucleotides and derivatives	69-89-6	1	230500	955030	534310	573280	100850	182290	151920	145020	1.37627	0.176843	0.52098	0.252965	-1.98299	down
Cmdn000784	Uric acid	Nucleotides and derivatives	Nucleotides and derivatives	69-93-2	1	93862	322670	262220	226251	20211	72429	24649	39096.3	1.45428	0.104385	0.456224	0.172801	-2.53282	down
pme0264	Thymidine	Nucleotides and derivatives	Nucleotides and derivatives	50-89-5	2	178450	177130	155060	170213	43610	88534	83806	71983.3	1.55895	0.00850657	0.272873	0.422901	-1.24161	down
Lmqp000329	5-Aminoimidazole ribonucleotide	Nucleotides and derivatives	Nucleotides and derivatives	25635-88-5	1	39241000	34442000	45600000	39761000	15428000	25120000	18735000	19761000	1.56555	0.0100698	0.296241	0.496995	-1.0087	down
pme3184	2'-Deoxyadenosine-5'-monophosphate	Nucleotides and derivatives	Nucleotides and derivatives	653-63-4	2	3539800	4190200	6184800	4.63827e+06	17627000	12620000	12688000	1.43117e+07	1.6384	0.0148806	0.319922	3.08556	1.62553	up
mws0147	β-Hydroxyisovaleric acid	Organic acids	Organic acids	625-08-1	3	13614000	10850000	5713800	1.00593e+07	4317100	4184700	6101300	4867700	1.3428	0.14655	0.502456	0.483902	-1.04721	down
pme0274	6-Aminocaproic acid	Organic acids	Organic acids	60-32-2	2	26123000	11998000	17098000	1.84063e+07	6275600	9320000	7991800	7.86247e+06	1.48148	0.119493	0.465966	0.427161	-1.22715	down
Lmgn000160	3-Ureidopropionic Acid	Organic acids	Organic acids	462-88-4	1	1951200	3800700	5342800	3.69823e+06	552550	1167300	814000	844617	1.51015	0.0960856	0.456224	0.228384	-2.13047	down
Wmzn000227	2,2-Dimethylsuccinic acid	Organic acids	Organic acids	597-43-3	3	266300	121880	174070	187417	66788	79735	66581	71034.7	1.53657	0.108753	0.459521	0.37902	-1.39965	down
MWS0205	Allantoin	Organic acids	Organic acids	97-59-6	2	122260	567220	900470	529983	37364	93739	156620	95907.7	1.23388	0.191591	0.530313	0.180964	-2.46623	down
Lmgn002091	2-Methyl-3-oxoadipic acid	Organic acids	Organic acids	-	1	18658000	15657000	6820400	13711800	2616900	5411900	3680000	3.90293e+06	1.50058	0.103298	0.456224	0.28464	-1.81279	down
mws0242	Suberic Acid	Organic acids	Organic acids	505-48-6	2	1379100	1085300	658540	1040980	429490	710320	386430	508747	1.37276	0.109321	0.459521	0.488719	-1.03292	down
pme0278	2,6-Diaminooimelic acid	Organic acids	Organic acids	583-93-7	3	788580	723280	1724000	1078620	241850	523290	199020	321387	1.41119	0.133899	0.484497	0.297961	-1.7468	down
Lmmn003323	2-Hydroxyhexadecanoic acid	Organic acids	Organic acids	764-67-0	1	2675400	1956600	1892600	2.17487e+06	986830	1200600	662450	949960	1.53863	0.0205625	0.319922	0.43679	-1.19499	down
pmf0175	2-Decanol*	Others	Saccharides and Alcohols	1120-06-5	3	3704100	7981400	6010700	5.89873e+06	2017900	2987500	1185700	2063700	1.40941	0.0735552	0.42584	0.349855	-1.51517	down
pmf0174	1-Decanol*	Others	Saccharides and Alcohols	112-30-1	3	3700500	7897600	6182100	5.92673e+06	1948100	2932700	1190900	2023900	1.42536	0.0689501	0.42584	0.341487	-1.5501	down
Zmjp000624	Pyridoxal	Others	Vitamin	66-72-8	3	2480700	2296500	2173700	2.31697e+06	5499900	4434000	5101100	5.01167e+06	1.67157	0.00880234	0.272873	2.16303	1.11305	up
pme1383	Pyridoxine	Others	Vitamin	65-23-6	3	1708300	1844800	1401200	1.65143e+06	8485500	4478900	7607100	6.85717e+06	1.63575	0.0489725	0.371791	4.15225	2.05389	up
Zmyn000110	D-Glucosamine 1-phosphate	Others	Saccharides and Alcohols	2152-75-2	2	744330	679200	831690	751740	213720	428780	338430	326977	1.55941	0.00693516	0.272873	0.43496	-1.20105	down
pmb0789	Pyridoxine-5'-O-glucoside	Others	Vitamin	-	3	9622600	11853000	16138000	1.25379e+07	47611000	36582000	35837000	40010000	1.65602	0.00796731	0.272873	3.19113	1.67407	up
pmb0790	Pyridoxine-5'-O-diglucoside	Others	Vitamin	-	2	42183	55056	130610	75949.7	236500	205610	110410	184173	1.3381	0.088586	0.454538	2.42494	1.27795	up
mws1336	4-Aminobenzoic acid	Phenolic acids	Phenolic acids	150-13-0	3	283830	421630	360130	355197	89413	210100	118240	139251	1.50945	0.016375	0.319922	0.392039	-1.35093	down
mws0921	p-Coumaryl alcohol	Phenolic acids	Phenolic acids	3690-05-9	3	833810	2189900	1028200	1.35064e+06	175830	621420	135990	311080	1.41975	0.120753	0.465966	0.230321	-2.11828	down
MWSmce040	Isovanillin	Phenolic acids	Phenolic acids	621-59-0	2	2990600	6974800	4522100	4.82917e+06	465990	5080900	839250	2.12871e+06	1.1476	0.228239	0.544262	0.440803	-1.18179	down
MWS1846	Phenoxyacetic acid	Phenolic acids	Phenolic acids	122-59-8	2	4602200	13418000	6686300	8235500	290230	10185000	851260	3.7755e+06	1.09726	0.346795	0.644631	0.458442	-1.12519	down
mws0145	O-Anisic acid (2-Methoxybenzoic acid)	Phenolic acids	Phenolic acids	529-75-9	2	2073800	5807000	3115100	3665300	98832	5006500	355030	1.82012e+06	1.07857	0.402303	0.683451	0.496582	-1.0099	down
mws0458	Vanillin; 4-Hydroxy-3-Methoxybenzaldehyde	Phenolic acids	Phenolic acids	121-33-5	2	742860	1931700	1212800	1.29579e+06	74104	1262900	125320	487441	1.19017	0.195732	0.531478	0.376174	-1.41053	down
NK10253223	2-Amino-3-methoxybenzoic acid	Phenolic acids	Phenolic acids	3177-80-8	3	1539600	1412900	1385000	1.44583e+06	3399400	2641400	3236500	3.09243e+06	1.66482	0.0158727	0.319922	2.13886	1.09684	up
mws2212	Caffeic acid	Phenolic acids	Phenolic acids	331-39-5	1	53512000	33709000	36018000	4.10797e+07	261450000	44361000	124120000	1.4331e+08	1.23103	0.247426	0.556148	3.4886	1.80265	up
Lmtn002565	1-O-Vanilloyl-D-Glucose	Phenolic acids	Phenolic acids	-	3	78410	80512	176860	111927	479940	424420	618700	507687	1.61226	0.00817835	0.272873	4.53586	2.18138	up
pma0149	Sinapoyl malate	Phenolic acids	Phenolic acids	92344-58-6	3	403610	578950	910720	631093	426890	351980	140110	306327	1.09282	0.149154	0.506175	0.48539	-1.04278	down
Lmsn003318	1-O-Feruloyl-β-D-glucose	Phenolic acids	Phenolic acids	7196-71-6	3	2916500	2515500	3032200	2821400	6617700	5092800	8316500	6.67567e+06	1.60388	0.0501686	0.377024	2.36608	1.2425	up
Hmln003529	Benzyl β-primeveroside	Phenolic acids	Phenolic acids	130622-31-0	1	1478000	1394400	601340	1.15791e+06	203510	1093300	435420	577410	1.10911	0.207257	0.54105	0.498664	-1.00386	down
Cmyp005062	Salireposide	Phenolic acids	Phenolic acids	16955-55-8	3	9	50196	396030	148745	7332400	3271800	846960	3.81705e+06	1.21087	0.191588	0.530313	25.6617	4.68155	up
pmb2654	Anthranilate-1-O-Sophoroside	Phenolic acids	Phenolic acids	-	3	401010	67392	91173	186525	862570	208400	469730	513567	1.11054	0.226695	0.544262	2.75334	1.46118	up
pmb3072	3-O-p-Coumaroylshikimic acid-O-glucoside	Phenolic acids	Phenolic acids	-	3	136540	116870	171080	141497	286020	287840	661130	411663	1.44669	0.160702	0.507175	2.90935	1.5407	up

## Sheet: Table S4
Supplementary Table S4: Kyoto Encyclopedia of Genes and Genomes (KEGG) pathway enrichment analysis of differentially accumulated metaboiltes between Red and Blue LED treated sweet potato leaves
Kegg_level_1	Kegg_pathway	ko_id	Metabolome_frequency	P_value	DA_score	Up_num	Down_num
Metabolism	Linoleic acid metabolism	ko00591	16 out of 305 5.24590163934426%	0.000314586	-0.5	0	8
Metabolism	alpha-Linolenic acid metabolism	ko00592	11 out of 305 3.60655737704918%	0.00865312	-0.454545	0	5
Metabolism	Lysine degradation	ko00310	14 out of 305 4.59016393442623%	0.102988	-0.285714	0	4
Metabolism	Vitamin B6 metabolism	ko00750	7 out of 305 2.29508196721311%	0.239342	0.285714	2	0
Genetic Information Processing	Aminoacyl-tRNA biosynthesis	ko00970	19 out of 305 6.22950819672131%	0.242034	-0.210526	0	4
Metabolism	Indole alkaloid biosynthesis	ko00901	2 out of 305 0.655737704918033%	0.251165	-0.5	0	1
Metabolism	Folate biosynthesis	ko00790	2 out of 305 0.655737704918033%	0.251165	-0.5	0	1
Metabolism	beta-Alanine metabolism	ko00410	8 out of 305 2.62295081967213%	0.29311	-0.25	0	2
Metabolism	Lysine biosynthesis	ko00300	8 out of 305 2.62295081967213%	0.29311	-0.25	0	2
Metabolism	Cyanoamino acid metabolism	ko00460	8 out of 305 2.62295081967213%	0.29311	-0.25	0	2
Metabolism	Tryptophan metabolism	ko00380	9 out of 305 2.95081967213115%	0.346489	0	1	1
Metabolism	Porphyrin and chlorophyll metabolism	ko00860	3 out of 305 0.983606557377049%	0.352492	-0.333333	0	1
Metabolism	Purine metabolism	ko00230	24 out of 305 7.86885245901639%	0.407543	-0.0833333	1	3
Metabolism	Biosynthesis of amino acids	ko01230	53 out of 305 17.3770491803279%	0.420472	-0.150943	0	8
Metabolism	Biosynthesis of secondary metabolites	ko01110	112 out of 305 36.7213114754098%	0.434244	-0.125	1	15
Metabolism	Thiamine metabolism	ko00730	4 out of 305 1.31147540983607%	0.440399	-0.25	0	1
Metabolism	Caffeine metabolism	ko00232	4 out of 305 1.31147540983607%	0.440399	-0.25	0	1
Metabolism	Phenylpropanoid biosynthesis	ko00940	19 out of 305 6.22950819672131%	0.483791	-0.0526316	1	2
Metabolism	Biosynthesis of various secondary metabolites - part 2	ko00998	12 out of 305 3.9344262295082%	0.496868	-0.166667	0	2
Metabolism	Glycine, serine and threonine metabolism	ko00260	12 out of 305 3.9344262295082%	0.496868	-0.166667	0	2
Metabolism	Glutathione metabolism	ko00480	5 out of 305 1.63934426229508%	0.516624	-0.2	0	1
Metabolism	Valine, leucine and isoleucine degradation	ko00280	5 out of 305 1.63934426229508%	0.516624	-0.2	0	1
Metabolism	Histidine metabolism	ko00340	6 out of 305 1.9672131147541%	0.582685	-0.166667	0	1
Metabolism	Phosphonate and phosphinate metabolism	ko00440	6 out of 305 1.9672131147541%	0.582685	-0.166667	0	1
Metabolism	Pantothenate and CoA biosynthesis	ko00770	7 out of 305 2.29508196721311%	0.639909	-0.142857	0	1
Metabolism	Biosynthesis of unsaturated fatty acids	ko01040	7 out of 305 2.29508196721311%	0.639909	-0.142857	0	1
Metabolism	Sulfur metabolism	ko00920	7 out of 305 2.29508196721311%	0.639909	-0.142857	0	1
Metabolism	Glucosinolate biosynthesis	ko00966	8 out of 305 2.62295081967213%	0.689452	-0.125	0	1
Metabolism	Pyrimidine metabolism	ko00240	19 out of 305 6.22950819672131%	0.755083	-0.105263	0	2
Metabolism	Arginine biosynthesis	ko00220	10 out of 305 3.27868852459016%	0.769399	-0.1	0	1
Metabolism	Phenylalanine, tyrosine and tryptophan biosynthesis	ko00400	11 out of 305 3.60655737704918%	0.801449	-0.0909091	0	1
Metabolism	Amino sugar and nucleotide sugar metabolism	ko00520	12 out of 305 3.9344262295082%	0.829138	-0.0833333	0	1
Metabolism	Arginine and proline metabolism	ko00330	12 out of 305 3.9344262295082%	0.829138	-0.0833333	0	1
Metabolism	Alanine, aspartate and glutamate metabolism	ko00250	12 out of 305 3.9344262295082%	0.829138	-0.0833333	0	1
Metabolism	Biosynthesis of cofactors	ko01240	54 out of 305 17.7049180327869%	0.89163	-0.0185185	2	3
Metabolism	Glyoxylate and dicarboxylate metabolism	ko00630	16 out of 305 5.24590163934426%	0.906821	-0.0625	0	1
Metabolism	Cysteine and methionine metabolism	ko00270	16 out of 305 5.24590163934426%	0.906821	-0.0625	0	1
Metabolism	2-Oxocarboxylic acid metabolism	ko01210	29 out of 305 9.50819672131148%	0.926478	-0.0689655	0	2
Environmental Information Processing	ABC transporters	ko02010	44 out of 305 14.4262295081967%	0.958464	-0.0681818	0	3
Metabolism	Carbon metabolism	ko01200	25 out of 305 8.19672131147541%	0.976977	-0.04	0	1
Metabolism	Metabolic pathways	ko01100	252 out of 305 82.6229508196721%	0.98819	-0.0833333	4	25

## Sheet: Table S5
Supplementary Table S5: Overview of RNA sequencing of leaf of sweet potato treated under blue (B) and red (R) LED
Sample	Total Reads	Mapped Reads	Uniq Mapped Reads	Multiple Map Reads	Reads Map to '+'	Reads Map to '-'	Clean reads	Clean bases	GC content	≥Q30 (%)
B1	39925712	30,543,835 (76.50%)	28,884,745 (72.35%)	1,659,090 (4.16%)	16,270,698 (40.75%)	16,216,653 (40.62%)	23048691	6895639408	0.4676	0.9471
B2	45924922	34,876,569 (75.94%)	32,981,742 (71.82%)	1,894,827 (4.13%)	18,571,211 (40.44%)	18,525,401 (40.34%)	21492815	6427241914	0.4645	0.9457
B3	46963246	35,769,122 (76.16%)	33,756,494 (71.88%)	2,012,628 (4.29%)	19,067,308 (40.60%)	19,083,426 (40.63%)	23069758	6888094530	0.4604	0.9449
R1	46097382	34,800,506 (75.49%)	32,906,540 (71.38%)	1,893,966 (4.11%)	18,581,513 (40.31%)	18,443,352 (40.01%)	19962856	5973321108	0.4665	0.9467
R2	42985630	32,724,509 (76.13%)	30,909,253 (71.91%)	1,815,256 (4.22%)	17,488,977 (40.69%)	17,371,755 (40.41%)	22962461	6870824282	0.4645	0.9441
R3	46139516	34,957,385 (75.76%)	33,012,754 (71.55%)	1,944,631 (4.21%)	18,673,411 (40.47%)	18,577,710 (40.26%)	23481623	7029053412	0.4713	0.9427
